# Supplementary material for: Dual Targeting of MDM4 and FTH1 by MMRi71 for Induced Protein Degradation and p53-Independent Apoptosis in Leukemia Cells
Source: MDPI journal article supplement (doi:10.3390/molecules27227665), 2022-11-08

**Dual Targeting MDM4 and FTH1 by Small-Molecule MMRI71 for Induced Protein  
Degradation and p53-independent Apoptosis in Leukemia Cells**

Rati Lama<sup>1†</sup>, Samuel L. Galster<sup>2†</sup>, Chao Xu<sup>1</sup>, Luke W. Davison,<sup>2</sup> Sherry R. Chemler<sup>2\*</sup> and  
Xinjiang Wang<sup>1\*</sup>

Department of Pharmacology and Therapeutics, Roswell Park Comprehensive Cancer Center,  
Buffalo, NY 14263, USA

Department of Chemistry, University at Buffalo, State University of New York, Buffalo, NY  
14260, <sup>USA</sup>

**Table of Contents**

|                                             |      |
|---------------------------------------------|------|
| Discussion of covalent inhibition mechanism | S-2  |
| General Information                         | S-2  |
| Synthesis and data for new analogs          | S-4  |
| References                                  | S-28 |

## Supporting Information

### A. Discussion of potential covalent inhibition mechanism:

We have presented data that indicates that **MMRi62** and perhaps some **62**- and **67**-based analogs (including **MMRi71**), might function in part as covalent inhibitors. We envision covalent inhibition could occur, as previously proposed for related phenolic benzylic amines,<sup>1-3</sup> via a quinone methide forming reaction followed by addition of a protein's nucleophilic functionality (e.g. amine or thiol) to the resulting electrophile. Our further efforts to probe this mechanism are underway and will be reported in due course. Thus far, a covalent protein-**MMRi62** covalent adduct has not been isolated or biochemically identified. We did find **MMRi62** to be stable in C<sub>2</sub>D<sub>5</sub>OD at 100 °C for 24 h including with added CD<sub>3</sub>CO<sub>2</sub>D and deuterated pyridine, respectively (<sup>1</sup>H NMR analysis, separate experiments), so if **MMRi62** and related analogs are covalent inhibitors, it is likely they selectively bind their targets and become activated to the quinone methide within the target.

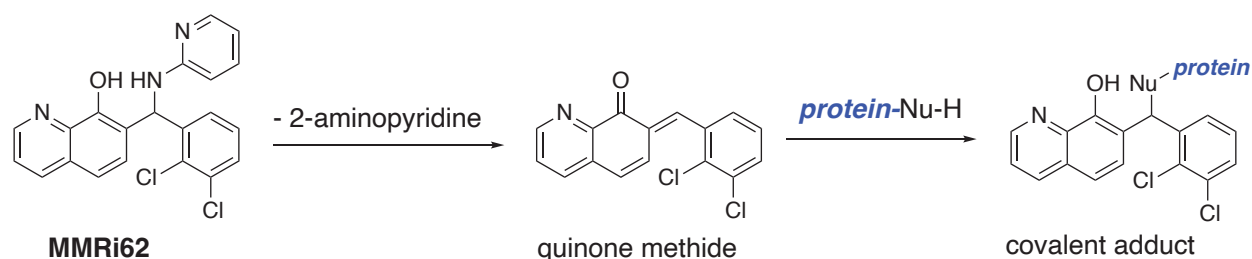

### B. Chemistry Experimental Procedures and New Compound Characterization

#### General Information

All reagents were used out of the bottle as purchased from the supplier without further purification unless otherwise noted. <sup>1</sup>H NMR spectra were recorded in CDCl<sub>3</sub> (using 7.26 ppm for reference of CHCl<sub>3</sub>), CD<sub>2</sub>Cl<sub>2</sub> (using 5.30 ppm for reference of CH<sub>2</sub>Cl<sub>2</sub>) DMSO-d<sub>6</sub> (using 2.50 ppm for

reference of DMSO) at 300 or 400 MHz.  $^{13}\text{C}$  NMR spectra were recorded in  $\text{CDCl}_3$  (using 77.0 ppm as internal reference),  $\text{CD}_2\text{Cl}_2$  (using 54.0 ppm as internal reference), or  $\text{DMSO-d}_6$  (using 40.0 ppm as internal reference) at 75.5 or 101 MHz. IR spectra were taken neat using a Nicolet-Impact 420 FTIR. Wave numbers in  $\text{cm}^{-1}$  are reported for characteristic peaks. High resolution mass spectra were obtained at SUNY Buffalo's mass spec facility on a ThermoFinnigan MAT XL spectrometer. Melting points were obtained on an electrothermal melting point apparatus and are reported uncorrected. 2-Aminopyridine, 1,3-dichlorobenzaldehyde, 8-hydroxyquinoline, 1-naphthol phenol, and 5-chloro-8-hydroxyquinoline were purchased from Acros and used without further purification. N-Phenyl-bis(trifluoromethanesulfonimide) was purchased from AK Scientific used without further purification. 4,5-Dichloropyridine-3-carbaldehyde was purchased from AABlocks and used without further purification. Analogs **67-2** and **67-3** were obtained as part of a compound screening library from Hit2lead Chembridge. Known analog **62-11** was synthesized as previously reported.<sup>4-5</sup> Analogs in the **62** and **67** series were synthesized via a 3-component Betti reactions.<sup>4-6</sup> Ethyl 4-formylbenzoate was synthesized as previously reported.<sup>7</sup>

*Statement on compound purity:* The purity of each **MMRi62** or **MMRi67** analog compound that was subjected to cellular and biochemical assays was assessed by each compound's  $^1\text{H}$  NMR spectra, acquired at 300 or 400 MHz.<sup>8</sup> These spectra are included at the end of this SI. Based on these spectra, all compounds were at least 95% pure. In addition, the HPLC trace of **MMRi71** is provided and supports that it is >95% pure.

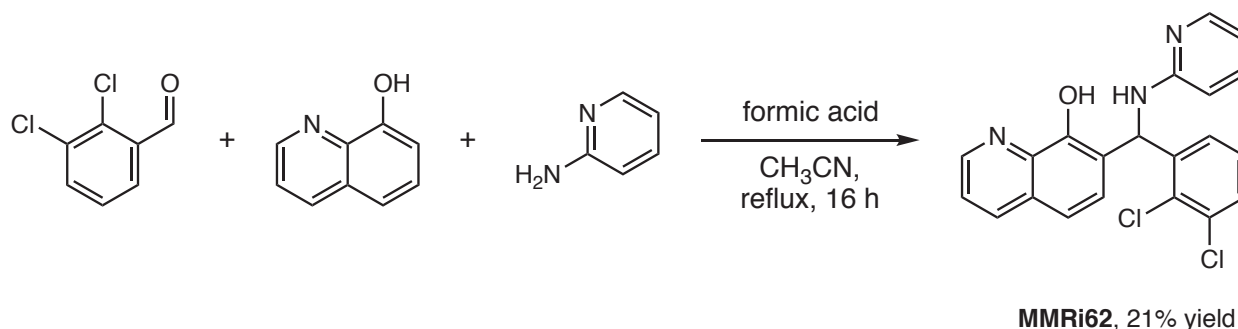

### 7-((2,3-Dichlorophenyl)(pyridin-2-ylamino)methyl)quinolin-8-ol (MMRI62)

To a dry 50 mL round-bottomed flask, 2-aminopyridine (269 mg, 2.86 mmol, 1.0 equiv.), 2,3-dichlorobenzaldehyde (500 mg, 2.86 mmol, 1.0 equiv.), and 8-hydroxyquinoline (500 mg, 3.43 mmol, 1.2 equiv) were dissolved in CH<sub>3</sub>CN (30 mL). Following the addition of formic acid (86  $\mu$ L, 2.29 mmol 0.80 eq), the solution was refluxed for 16 h. The solution was allowed to cool to rt, concentrated, and the crude mixture was then directly purified by flash column chromatography (silica gel, 10-20% acetone:hexanes) to give **MMRI62** as a white solid (236 mg, 21%). mp = 178-179 °C; <sup>1</sup>H NMR (300 MHz, CDCl<sub>3</sub>)  $\delta$  8.76 (d, *J* = 4.1 Hz, 1H), 8.17 – 8.04 (m, 2H), 7.59 (d, *J* = 7.8 Hz, 1H), 7.47 – 7.34 (m, 4H), 7.29 (s, 1H), 7.19 (t, *J* = 7.9 Hz, 1H), 6.68 (d, *J* = 6.3 Hz, 1H), 6.61 (t, *J* = 6.1 Hz, 1H), 6.35 (d, *J* = 8.4 Hz, 1H), 5.55 (d, *J* = 6.4 Hz, 1H).; <sup>13</sup>C NMR (75 MHz, CDCl<sub>3</sub>)  $\delta$  157.5, 149.8, 148.2, 148.1, 141.5, 138.2, 137.8, 136.0, 133.5, 132.0, 129.4, 127.8, 127.2, 127.1, 126.9, 122.0, 121.3, 117.7, 113.7, 106.7, 53.8.; IR neat film: 3351, 3079, 1599, 1571, 1516, 1502 cm<sup>-1</sup>; HRMS (ESI) calculated for [C<sub>21</sub>H<sub>16</sub>Cl<sub>2</sub>N<sub>3</sub>O]<sup>+</sup>: 396.0665, found 396.0649.

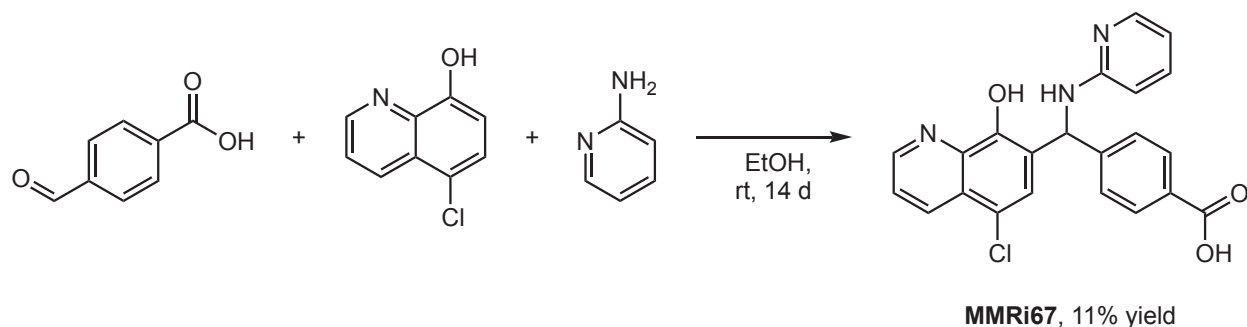

#### 4-((5-Chloro-8-hydroxyquinolin-7-yl)(pyridin-2-ylamino)methyl)benzoic acid (**MMRI67**)

To a dry 10 mL round-bottomed flask, 2-aminopyridine (94.11 mg, 1.0 mmol, 1.0 equiv.) and 4-carboxybenzaldehyde (150.13 mg, 1.0 mmol, 1.0 equiv.) were dissolved in EtOH (5 mL). Then 5-chloro-8-hydroxyquinoline (179.60 mg, 1.0 mmol, 1.0 equiv) was added, the flask was capped and stirred at rt for 14 d. Upon appearance of a precipitate, the stirring was stopped and the solid allowed to settle. The solid was filtered and washed with HPLC grade hexanes to give **MMRI67** as an orange solid (45 mg, 11%). mp = 199-200 °C; <sup>1</sup>H NMR (400 MHz, DMSO-d<sub>6</sub>) δ 12.83 (bs, 1H), 10.40 (bs, 1H), 8.95 (s, 1H), 8.46 (d, *J* = 8.5 Hz, 1H), 7.89 (d, *J* = 6.2 Hz, 3H), 7.77 (s, 1H), 7.74 – 7.66 (m, 1H), 7.53 (d, *J* = 8.7 Hz, 1H), 7.48 (d, *J* = 6.3 Hz, 2H), 7.41 (t, *J* = 7.9 Hz, 1H), 6.96 (d, *J* = 8.4 Hz, 1H), 6.71 (d, *J* = 8.4 Hz, 1H), 6.51 (t, *J* = 6.3 Hz, 1H); <sup>13</sup>C NMR (101 MHz, DMSO-d<sub>6</sub>) δ 167.1, 157.6, 149.4, 149.2, 148.0, 147.4, 138.7, 136.9, 132.5, 129.5, 129.3, 127.3, 126.3, 126.0, 124.9, 122.9, 118.7, 112.5, 109.0, 51.2. IR neat film: 3281, 2953, 1672, 1603, 1576, 1504 cm<sup>-1</sup>; HRMS (ESI) calculated for [C<sub>22</sub>H<sub>17</sub>ClN<sub>3</sub>O<sub>3</sub>]<sup>+</sup>: 406.0953, found 406.0964.

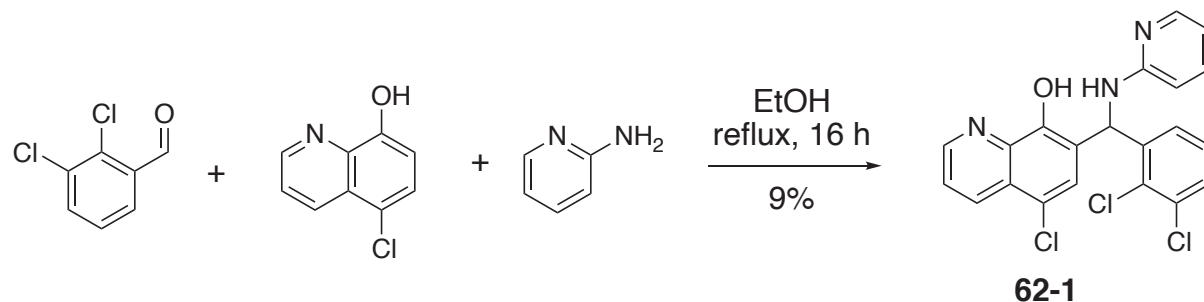

### 5-Chloro-7-((2,3-dichlorophenyl)(pyridin-2-ylamino)methyl)quinolin-8-ol (62-1)

In a 50 mL pressure tube, 2-aminopyridine (94 mg, 1 mmol, 1.0 equiv.), 2,3-dichlorobenzaldehyde (175 mg, 1 mmol, 1.0 equiv.), and 5-chloro-8-hydroxyquinoline (180 mg, 1 mmol, 1.0 equiv) were dissolved in absolute ethanol (5 mL). The tube was capped and heated to 80 °C for 16 h. Upon cooling to rt a precipitate formed. This solid was filtered and washed with Et<sub>2</sub>O to yield pure **1-15** as a tan solid (40 mg, 9% yield). mp = 178-181 °C; <sup>1</sup>H NMR (300 MHz, CDCl<sub>3</sub>) δ 8.82 (d, *J* = 4.3 Hz, 1H), 8.48 (d, *J* = 8.5 Hz, 1H), 8.09 (d, *J* = 5.0 Hz, 1H), 7.60 – 7.50 (m, 2H), 7.48 (s, 1H), 7.42 (q, *J* = 4.0 Hz, 2H), 7.21 (t, *J* = 7.9 Hz, 1H), 6.70 (d, *J* = 6.3 Hz, 1H), 6.63 (t, *J* = 6.2 Hz, 1H), 6.37 (d, *J* = 8.4 Hz, 1H), 5.48 (d, *J* = 6.3 Hz, 1H); <sup>13</sup>C NMR (75 MHz, CDCl<sub>3</sub>) δ 157.2, 149.0, 148.7, 147.6, 140.8, 138.6, 138.1, 133.6, 133.3, 132.0, 129.7, 127.4, 126.8, 126.7, 125.8, 122.7, 121.8, 121.8, 120.6, 113.9, 107.1, 53.4; IR neat film: 1598, 1574, 1495 cm<sup>-1</sup>; HRMS (ESI) calculated for [C<sub>21</sub>H<sub>15</sub>Cl<sub>3</sub>N<sub>3</sub>O]<sup>+</sup>: 430.0275, found 430.0281.

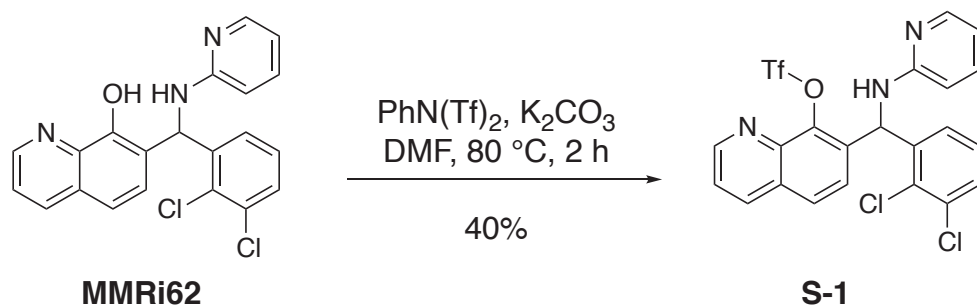

### 7-((2,3-Dichlorophenyl)(pyridin-2-ylamino)methyl)quinolin-8-yl trifluoromethanesulfonate (S-1)

In a 10 mL reaction tube, **MMRI62** (285 mg, 0.72 mmol, 1.0 equiv.) was dissolved in dry DMF (1 mL) under argon atmosphere. N-Phenyl-bis(trifluoromethanesulfonimide) (385 mg, 1.08 mmol,

1.5 equiv.) and potassium carbonate (150 mg, 1.09 mmol, 1.5 equiv.) were added, the tube was capped and the solution was heated in an 80 °C oil bath for 2 h. The solution was then cooled to rt, diluted with EtOAc, and washed three times with H<sub>2</sub>O. The organic layer was dried over Na<sub>2</sub>SO<sub>4</sub>, and then concentrated. The crude mixture was purified by flash column chromatography (silica gel, 10% acetone/hexanes gradient) to yield **S-1** as a white solid (152 mg, 40% yield). mp = 201-203 °C; <sup>1</sup>H NMR (400 MHz, CDCl<sub>3</sub>) δ 9.04 (d, *J* = 4.2 Hz, 1H), 8.19 (d, *J* = 8.4 Hz, 1H), 8.06 (d, *J* = 5.1 Hz, 1H), 7.78 (d, *J* = 8.6 Hz, 1H), 7.54 (dd, *J* = 8.4, 4.2 Hz, 1H), 7.49 – 7.32 (m, 4H), 7.19 (t, *J* = 7.9 Hz, 1H), 6.69 (d, *J* = 5.2 Hz, 1H), 6.65 (t, 1H), 6.32 (d, *J* = 8.4 Hz, 1H), 5.16 (d, *J* = 5.2 Hz, 1H); <sup>13</sup>C NMR (101 MHz, CDCl<sub>3</sub>) δ 156.9 151.3, 148.3, 144.3, 140.5, 140.0, 137.7, 135.6, 134.0, 132.6, 132.3, 130.1, 129.1, 127.8, 127.4, 126.8, 125.8, 122.8, 120.4, 117.2, 114.4, 106.8, 53.2; IR neat film: 3373, 2924, 2853, 2323, 2050, 1715, 1600, 1574 cm<sup>-1</sup>; HRMS (ESI) calculated for [C<sub>22</sub>H<sub>15</sub>Cl<sub>2</sub>F<sub>3</sub>N<sub>3</sub>O<sub>3</sub>S]<sup>+</sup>: 528.0158, found 528.0179.

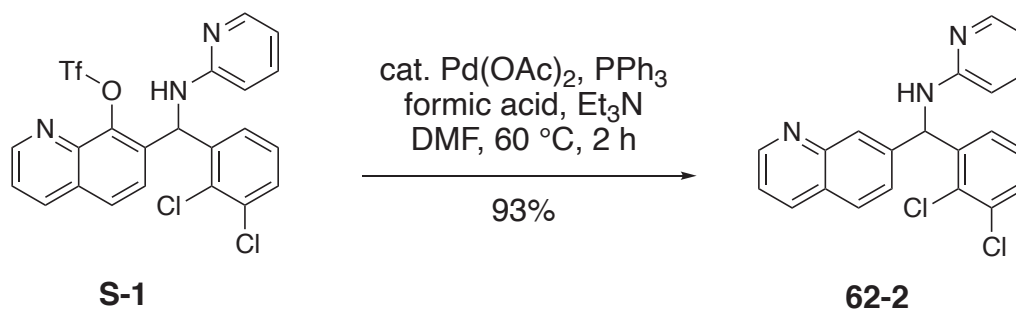

***N*-((2,3-Dichlorophenyl)(quinolin-7-yl)methyl)pyridin-2-amine (62-2)**

In a 10 mL pressure tube, **S-1** (90 mg, 0.17 mmol, 1.0 equiv), palladium acetate (4 mg, 0.017 mmol, 0.1 equiv), triphenylphosphine (9 mg, 0.034 mmol, 0.2 equiv), and triethylamine (71 μL, 0.51 mmol, 3.0 equiv) were combined in dry DMF (1 mL) under argon atmosphere.<sup>9</sup> Formic acid (13 μL, 0.34 mmol, 2.0 equiv) was added, and the reaction was capped and stirred at 60 °C for 2

h. Upon cooling to rt, the reaction mixture was diluted with brine and extracted with EtOAc. The organic layer was then washed three times with brine. The organic layer was dried over Na<sub>2</sub>SO<sub>4</sub> and then concentrated. The crude mixture was purified by flash column chromatography (silica gel, 30% EtOAc:hexanes gradient) to yield **62-2** as a white solid (60 mg, 93% yield). mp = 220-221 °C; <sup>1</sup>H NMR (300 MHz, CDCl<sub>3</sub>) δ 8.94 (d, *J* = 4.2 Hz, 1H), 8.37 (d, *J* = 8.2 Hz, 1H), 8.08 (d, *J* = 8.4 Hz, 2H), 7.64 – 7.55 (m, 1H), 7.50 – 7.35 (m, 4H), 7.25 – 7.18 (m, 2H), 7.01 (d, *J* = 6.6 Hz, 1H), 6.69 – 6.61 (m, 1H), 6.33 (d, *J* = 8.8 Hz, 1H), 5.00 (d, *J* = 6.6 Hz, 1H); <sup>13</sup>C NMR (75 MHz, CDCl<sub>3</sub>) δ 156.5, 151.3, 144.3, 140.5, 139.8, 138.3, 135.7, 134.0, 132.3, 130.2, 129.1, 127.9, 127.5, 126.8, 125.8, 122.8, 114.3, 107.1, 53.1; IR neat film: 3254, 3062, 3018, 2924, 2854, 2114, 1730, 1671, 1601, 1574, 1501 cm<sup>-1</sup>; HRMS (ESI) calculated for [C<sub>21</sub>H<sub>16</sub>Cl<sub>2</sub>F<sub>3</sub>N<sub>3</sub>]<sup>+</sup>: 380.0716, found 380.0714.

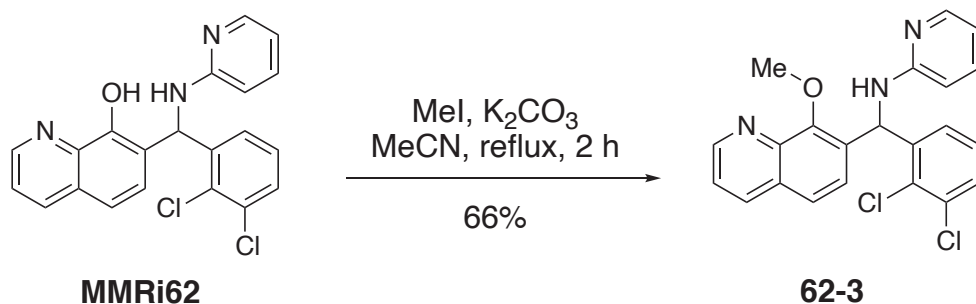

***N*-((2,3-Dichlorophenyl)(8-methoxyquinolin-7-yl)methyl)pyridin-2-amine (62-3)**

In a 10 mL pressure tube, **MMRI62** (50 mg, 0.13 mmol, 1.0 equiv) was dissolved in anhydrous acetonitrile (1 mL) under argon atmosphere. Potassium carbonate (20 mg, 0.14 mmol, 1.1 equiv), followed by methyl iodide (9 μL, 0.14 mmol, 1.1 equiv) were added to the solution. The mixture was stirred at reflux temperature for 2 h. Upon cooling to rt, the reaction mixture was diluted with ethyl acetate and washed with water. The organic layer was dried over sodium sulfate and then concentrated. The crude mixture was purified by flash column chromatography (silica gel, 10%-



20% acetone/hexanes gradient) to yield **62-3** as a white solid (33 mg, 66% yield). mp =122-123 °C;  $^1\text{H}$  NMR (300 MHz,  $\text{CDCl}_3$ )  $\delta$  8.93 (d,  $J$  = 4.6 Hz, 1H), 8.13 (d,  $J$  = 8.2 Hz, 1H), 8.07 (d,  $J$  = 4.9 Hz, 1H), 7.55 – 7.35 (m, 8H), 7.19 (t,  $J$  = 7.8 Hz, 1H), 6.77 (d,  $J$  = 6.4 Hz, 1H), 6.61 (t,  $J$  = 6.2 Hz, 1H), 6.34 (d,  $J$  = 8.4 Hz, 1H), 5.24 (d,  $J$  = 6.4 Hz, 1H), 4.05 (s, 1H);  $^{13}\text{C}$  NMR (75 MHz,  $\text{CDCl}_3$ )  $\delta$  157.4, 154.1, 149.6, 148.3, 142.8, 141.9, 137.7, 136.2, 133.6, 132.4, 132.0, 129.48, 129.45, 127.2, 127.0, 126.3, 123.2, 121.4, 113.8, 106.7, 62.5, 53.8; IR neat film: 3266, 3097, 3019, 1603, 1520, 1503  $\text{cm}^{-1}$ ; HRMS (ESI) calculated for  $[\text{C}_{22}\text{H}_{18}\text{Cl}_2\text{N}_3\text{O}]^+$ : 410.0821, found 410.0814.

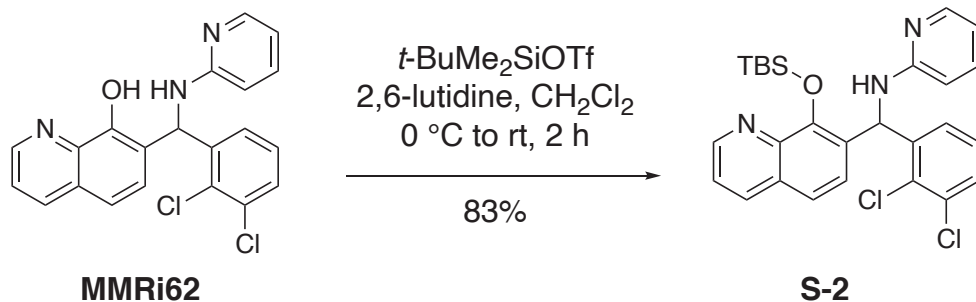

***N*-((8-((*tert*-Butyldimethylsilyl)oxy)quinolin-7-yl)(2,3-dichlorophenyl)methyl)pyridin-2-amine (S-2)**

In a 25 mL round-bottom flask, **MMRI62** (100 mg, 0.128 mmol, 1.0 equiv), and 2,6-lutidine (75  $\mu\text{L}$ , 0.630 mmol, 5.0 equiv) were dissolved in  $\text{CH}_2\text{Cl}_2$  (10 mL) under argon atmosphere at 0 °C. TBSOTf (0.15 mL, 0.630 mmol, 5.0 equiv) was added dropwise and allowed to stir for 1 h at 0 °C. The reaction was slowly warmed to rt and allowed to stir for an additional 2 h. The reaction mixture was quenched with aqueous  $\text{NaHCO}_3$  and extracted 3 times with  $\text{CH}_2\text{Cl}_2$ . The organic layers were combined and dried over  $\text{Na}_2\text{SO}_4$ . The organic solution was concentrated and purified by flash column chromatography (silica gel, 10% EtOAc:hexanes gradient) to yield **S-2** as a pale yellow solid (107 mg, 83% yield). mp = 74-77 °C;  $^1\text{H}$  NMR (300 MHz,  $\text{CDCl}_3$ )  $\delta$  8.79 (dd,  $J$  = 4.1, 1.6 Hz, 1H), 8.11 – 8.01 (m, 2H), 7.54 (dd,  $J$  = 7.6, 1.3 Hz, 1H), 7.45 – 7.33 (m, 3H), 7.27 (d,  $J$  = 8.4 Hz, 1H), 7.20 (t,  $J$  = 7.9 Hz, 1H), 7.13 (d,  $J$  = 8.5 Hz, 1H), 6.72 (d,  $J$  = 4.9 Hz, 1H), 6.66 – 6.55 (m, 1H), 6.23 (d,  $J$  = 8.4 Hz, 1H), 5.21 (d,  $J$  = 4.7 Hz, 1H), 0.89 (s, 9H), 0.36 (d,  $J$  = 3.0 Hz, 6H);  $^{13}\text{C}$  NMR (75 MHz,  $\text{CDCl}_3$ )  $\delta$  157.7, 151.2, 148.0, 147.1, 141.8, 140.3, 137.7, 135.6, 133.7, 132.1, 129.4, 129.0, 127.2, 126.7, 126.4, 121.5, 119.1, 113.7, 106.6, 53.4, 26.2, 19.3, -1.8, -2.1; IR neat film: 3217, 2984, 2927, 2854, 1598, 1573, 1502  $\text{cm}^{-1}$ ; HRMS (ESI) calculated for  $[\text{C}_{27}\text{H}_{30}\text{Cl}_2\text{N}_3\text{OSi}]^+$ : 510.1524, found 510.1530.

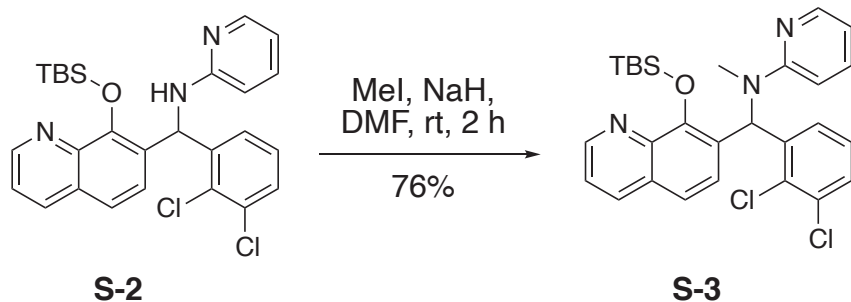

***N*-((8-((*tert*-Butyldimethylsilyl)oxy)quinolin-7-yl)(2,3-dichlorophenyl)methyl)-*N*-methylpyridin-2-amine (S-3)**

In a 5 mL round-bottom flask, intermediate **S-2** (107 mg, 0.209 mmol, 1.0 equiv) was dissolved in dry DMF (2.5 mL). Once dissolved, NaH (50 mg, 2.09 mmol, 10.0 equiv) was added and stirred for 15 min at rt. After 15 min, CH<sub>3</sub>I (0.13 mL, 2.09 mmol, 10.0 equiv) was added to the solution and allowed to stir for an additional 2 h at rt. The solution was then diluted with EtOAc (10 mL), and washed 3 times with H<sub>2</sub>O (10 mL). The organic layer was then dried over Na<sub>2</sub>SO<sub>4</sub> and concentrated. The crude mixture was then purified by flash column chromatography (silica gel, 10% EtOAc:hexanes gradient) to yield intermediate **S-3** as a white solid (84 mg, 76% yield). mp = 59-61 °C; <sup>1</sup>H NMR (300 MHz, CDCl<sub>3</sub>) δ 8.79 (dd, *J* = 4.1, 1.6 Hz, 1H), 8.19 (dd, *J* = 4.9, 1.2 Hz, 1H), 8.09 (dd, *J* = 8.3, 1.6 Hz, 1H), 7.46 – 7.33 (m, 4H), 7.31 (s, 1H), 7.20 (s, 1H), 7.15 – 7.07 (m, 2H), 7.01 (s, 1H), 6.56 (dd, *J* = 7.0, 5.0 Hz, 1H), 6.46 (d, *J* = 8.6 Hz, 1H), 2.97 (s, 3H), 0.80 (s, 9H), 0.36 (s, 3H), 0.26 (s, 3H); <sup>13</sup>C NMR (75 MHz, CDCl<sub>3</sub>) δ 158.4, 151.4, 147.8, 146.9, 141.6, 140.3, 137.0, 135.6, 133.8, 132.8, 129.3, 129.0, 127.6, 127.4, 127.0, 126.4, 121.3, 118.8, 112.2, 106.3, 58.9, 33.0, 26.0, 19.0, -1.8, -2.0; IR neat film: 2949, 2927, 2893, 2855, 1594, 1561, 1502 cm<sup>-1</sup>; HRMS (ESI) calculated for [C<sub>28</sub>H<sub>32</sub>Cl<sub>2</sub>N<sub>3</sub>OSi]<sup>+</sup>: 524.1699, found 524.1686.

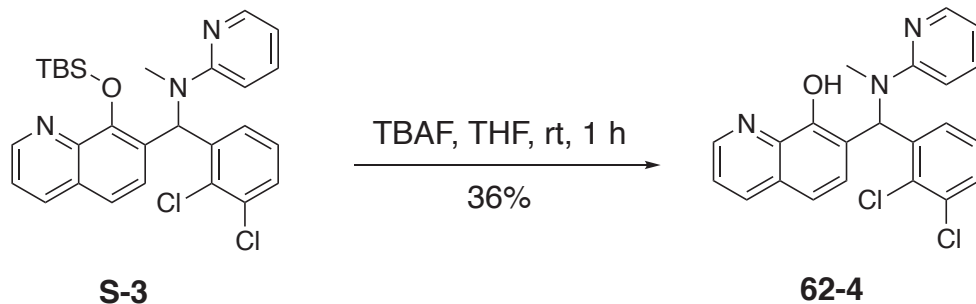

**7-((2,3-Dichlorophenyl)(methyl(pyridin-2-yl)amino)methyl)quinolin-8-ol (62-4)**

In a 10 mL round-bottomed flask, intermediate **S-3** (84 mg, 0.160 mmol, 1 equiv) was dissolved in dry THF (1 mL) under argon atmosphere at 0 °C. A 1 M solution of TBAF in THF (0.25 mL, 0.240 mmol, 1.5 equiv) was added dropwise at 0 °C and stirred for 1 h. The solution was slowly warmed to rt and stirred for 3 h. The reaction mixture was concentrated and dissolved in EtOAc. The solution was washed with saturated NH<sub>4</sub>Cl. The organic layer was dried over Na<sub>2</sub>SO<sub>4</sub> and concentrated. The crude mixture was purified by flash column chromatography (silica gel, 10% acetone:hexanes gradient) to yield **62-4** as a white solid (24 mg, 37% yield). mp = 169-170 °C; <sup>1</sup>H NMR (400 MHz, CDCl<sub>3</sub>) δ 8.79 (d, *J* = 2.7 Hz, 1H), 8.24 (d, *J* = 3.7 Hz, 1H), 8.16 (d, *J* = 8.2 Hz, 1H), 7.53 – 7.42 (m, 3H), 7.30 (t, *J* = 7.9 Hz, 1H), 7.22 – 7.10 (m, 3H), 6.69 – 6.53 (m, 2H), 2.99 (s, 3H); <sup>13</sup>C NMR (101 MHz, CDCl<sub>3</sub>) δ 158.5, 150.2, 148.3, 147.9, 141.0, 138.0, 137.3, 136.0, 133.7, 132.6, 129.4, 127.9, 127.5, 127.4, 127.1, 121.9, 120.7, 117.5, 112.4, 106.1, 58.3, 33.1; IR neat film: 3242, 2923, 1593, 1557, 1506 cm<sup>-1</sup>; HRMS (ESI) calculated for [C<sub>22</sub>H<sub>18</sub>Cl<sub>2</sub>N<sub>3</sub>O]<sup>+</sup>: 410.0834, found 410.0821.

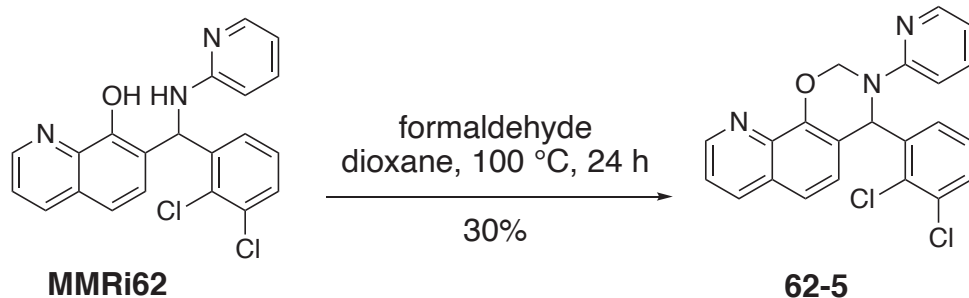

**4-(2,3-Dichlorophenyl)-3-(pyridin-2-yl)-3,4-dihydro-2H-[1,3]oxazino[5,6-*h*]-quinolone (62-5)**

To a 10 mL pressure tube, **MMRI62** (100 mg, 0.25 mmol, 1.0 equiv) and paraformaldehyde (8.5 mg, 0.28 mmol, 1.1 equiv) were dissolved in dioxane (1.5 mL).<sup>10</sup> The solution was heated to 100 °C for 24 h. Upon cooling to rt, the solution was diluted with Et<sub>2</sub>O, and concentrated. The crude mixture was purified by flash column chromatography (silica gel, 20-30% acetone:hexanes gradient) to give **62-5** as a green-white solid (30 mg, 30%). mp = 115-117 °C; <sup>1</sup>H NMR (400 MHz, CDCl<sub>3</sub>) δ 8.90 (d, *J* = 2.7 Hz, 1H), 8.25 (d, *J* = 4.8 Hz, 1H), 8.10 (d, *J* = 10.0 Hz, 1H), 7.56 (t, *J* = 6.9 Hz, 1H), 7.46 – 7.35 (m, 4H), 7.33 (s, 2H), 7.21 (d, *J* = 8.4 Hz, 1H), 7.13 – 7.07 (m, 3H), 6.95 (d, *J* = 7.7 Hz, 1H), 6.82 – 6.74 (m, 1H), 6.14 (d, *J* = 12.8 Hz, 1H), 5.22 (d, *J* = 11.0 Hz, 1H); <sup>13</sup>C NMR (75 MHz, CDCl<sub>3</sub>) δ 157.1, 150.3, 149.7, 147.9, 142.2, 139.7, 137.9, 136.0, 134.1, 133.3, 130.3, 129.9, 128.6, 127.0, 126.6, 121.8, 119.5, 119.2, 116.4, 110.1, 73.9, 54.2; IR neat film: 2957, 1736, 1592, 1568, 1503 cm<sup>-1</sup>; HRMS (ESI) calculated for [C<sub>22</sub>H<sub>16</sub>Cl<sub>2</sub>N<sub>3</sub>O]<sup>+</sup>: 408.0682, found 408.0665.

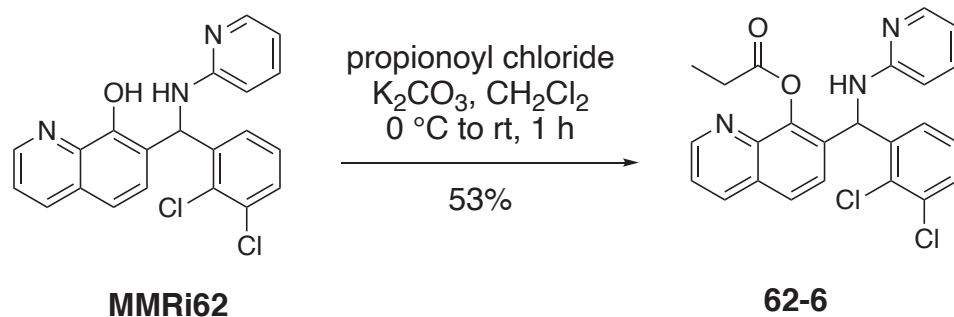

### 7-((2,3-Dichlorophenyl)(pyridin-2-ylamino)methyl)quinolin-8-yl propionate (**62-6**)

In a 250 mL dry round bottomed flask, **MMri62** (3 g, 7.6 mmol, 1.0 equiv) was dissolved in 70 mL of dry  $\text{CH}_2\text{Cl}_2$  under argon atmosphere. Potassium carbonate (2.0 g, 14.5 mmol, 2.0 equiv) was added and the solution was cooled to 0 °C. Propionoyl chloride (0.67 mL, 7.7 mmol, 1.0 equiv) was then added to the solution. The mixture was allowed to warm to rt and stirred for 1 h. The reaction mixture was then filtered through celite and washed with  $\text{CH}_2\text{Cl}_2$ . The supernatant was then treated with 800 mg DMT-functionalized silica gel and stirred for 15 min. The mixture was filtered and concentrated. The resulting crude solid was resuspended in ether and washed with deionized water. The organic layer was dried over  $\text{Na}_2\text{SO}_4$  and then concentrated. The crude mixture was purified by flash column chromatography (silica gel, 50-100% ether:hexanes gradient) to yield **62-6** as a white solid (1.8 g, 53% yield). mp = 110-111 °C;  $^1\text{H}$  NMR (300 MHz,  $\text{CDCl}_3$ )  $\delta$  8.92 (d,  $J$  = 4.2 Hz, 1H), 8.35 (d,  $J$  = 8.6 Hz, 1H), 8.10 (d,  $J$  = 5.2 Hz, 1H), 7.48 – 7.39 (m, 3H), 7.34 (dd,  $J$  = 16.3, 7.8 Hz, 2H), 7.24 – 7.12 (m, 2H), 7.00 (d,  $J$  = 6.5 Hz, 1H), 6.68 – 6.61 (m, 1H), 6.33 (d,  $J$  = 8.3 Hz, 1H), 5.03 (d,  $J$  = 6.5 Hz, 1H), 2.83 (q,  $J$  = 7.5 Hz, 2H), 1.35 (t,  $J$  = 7.5 Hz, 3H);  $^{13}\text{C}$  NMR (75 MHz,  $\text{CDCl}_3$ )  $\delta$  173.3, 156.7, 150.3, 148.4, 147.7, 141.7, 141.2, 137.8, 134.7, 133.8, 132.1, 132.1, 129.8, 127.8, 127.5, 127.0, 125.1, 122.1, 120.7, 114.1, 107.1, 53.7, 27.6, 9.2; IR (neat, thin film): 3384, 2925 2051, 1760, 1599, 1574, 1502, 1479, 1147, 1081, 898, 771  $\text{cm}^{-1}$ ; HRMS (ESI) calculated for  $[\text{C}_{24}\text{H}_{20}\text{Cl}_2\text{N}_3\text{O}_2]$ , (M+H) $^+$ : 452.0900, found 408.0928.

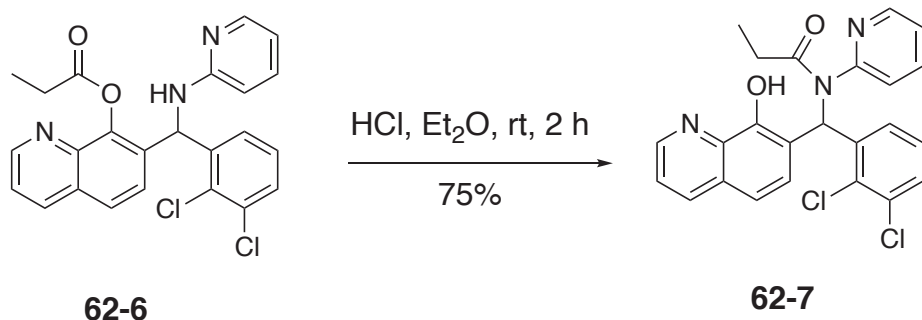

***N*-((2,3-Dichlorophenyl)(8-hydroxyquinolin-7-yl)methyl)-*N*-(pyridin-2-yl)propionamide  
(62-7)**

In a dry 10 mL dry round bottomed flask, analog **62-6** (20 mg, 0.041 mmol, 1.0 equiv) was dissolved in dry Et<sub>2</sub>O (1 mL). Hydrochloric acid (2M in ether, 0.1 mL, 0.2 mmol, 4.4 equiv) was then added, and the reaction was stirred for 2 h at rt. The solution was then concentrated and the crude mixture was purified by flash column chromatography (silica gel, 50% ethyl acetate:hexanes) to yield **62-7** as a white solid (15 mg, 75% yield). mp = 175-176 °C; <sup>1</sup>H NMR (300 MHz, CDCl<sub>3</sub>) δ 9.89 (s, 1H), 8.73 (d, *J* = 4.3 Hz, 1H), 8.11 (d, *J* = 8.7 Hz, 1H), 7.99 (d, *J* = 3.4 Hz, 1H), 7.58 (d, *J* = 7.8 Hz, 1H), 7.50 – 7.36 (m, 4H), 7.29 (d, *J* = 8.6 Hz, 1H), 7.20 (s, 1H), 7.11 – 7.01 (m, 1H), 6.69 (d, *J* = 3.8 Hz, 1H), 6.64 – 6.57 (m, 1H), 6.44 (d, *J* = 8.5 Hz, 1H), 2.30 (q, *J* = 7.5 Hz, 2H), 1.08 (t, *J* = 7.5 Hz, 2H); <sup>13</sup>C NMR (101 MHz, CDCl<sub>3</sub>) δ 173.0, 155.0, 151.1, 145.7, 141.2, 139.0, 135.9, 133.7, 131.9, 131.6, 130.4, 130.2, 129.2, 128.0, 127.9, 127.7, 126.3, 124.6, 122.1, 113.3, 109.1, 53.5, 27.4, 9.2, 9.0; IR (neat, thin film): 3352, 2981, 1599, 1572 cm<sup>-1</sup>; HRMS (ESI) calculated for [C<sub>24</sub>H<sub>20</sub>Cl<sub>2</sub>N<sub>2</sub>N<sub>3</sub>O<sub>2</sub>]<sup>+</sup>: 452.0927, found 452.0932.

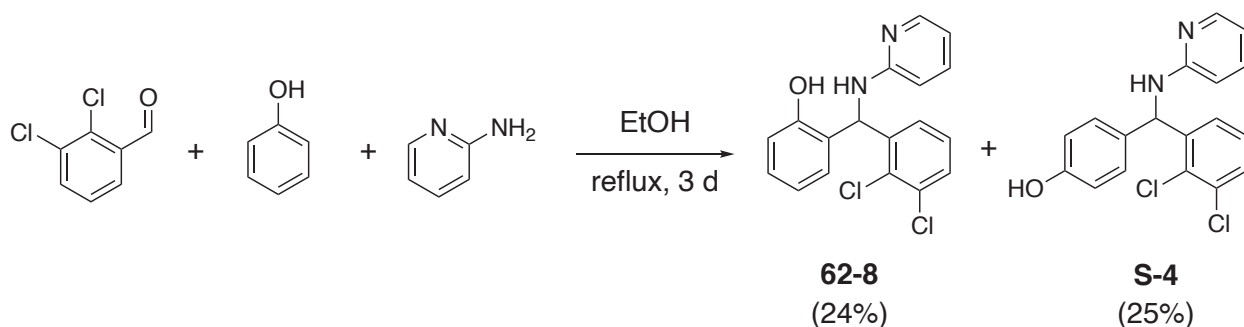

### 2-((2,3-Dichlorophenyl)(pyridin-2-ylamino)methyl)phenol (**62-8**)

To a 25 mL round-bottomed flask, 2-aminopyridine (75 mg, 0.796 mmol, 0.93 equiv) and 2,3-dichlorobenzaldehyde (150 mg, 0.857 mmol, 1.0 equiv) was dissolved in absolute ethanol (5 mL). Once fully dissolved, phenol (150 mg, 1.59 mmol, 1.9 equiv) was added to the solution. The mixture was stirred at reflux for 72 h. The reaction was allowed to cool and then concentrated. The crude mixture was purified by flash column chromatography (silica gel, 10-20% acetone:hexanes) to yield **62-8** as a white solid (70 mg, 24% yield), and **S-4** as a white solid (73 mg, 25% yield).

mp = 187-188 °C;  $^1\text{H}$  NMR (300 MHz,  $\text{CDCl}_3$ )  $\delta$  11.30 (s, 1H), 8.08 (dd,  $J$  = 5.2, 0.9 Hz, 2H), 7.68 (d,  $J$  = 7.6 Hz, 2H), 7.54 – 7.43 (m, 2H), 7.38 (dd,  $J$  = 8.0, 0.9 Hz, 2H), 7.19 (t,  $J$  = 7.9 Hz, 2H), 7.15 – 7.06 (m, 4H), 6.87 (dd,  $J$  = 8.2, 0.7 Hz, 2H), 6.77 (t,  $J$  = 7.5 Hz, 2H), 6.72 – 6.63 (m, 2H), 6.46 (t,  $J$  = 7.9 Hz, 4H), 6.31 (d,  $J$  = 8.2 Hz, 2H);  $^{13}\text{C}$  NMR (75 MHz,  $\text{CDCl}_3$ )  $\delta$  157.0, 155.8, 146.3, 141.3, 139.0, 133.4, 131.7, 129.5, 128.9, 127.2, 126.4, 126.0, 119.7, 117.1, 113.9, 108.4, 54.8; IR neat film: 3431, 3024, 2981, 2921, 2852, 2686, 2586, 1613, 1598, 1574  $\text{cm}^{-1}$ ; HRMS (ESI) calculated for  $[\text{C}_{18}\text{H}_{15}\text{Cl}_2\text{N}_2\text{O}]^+$ : 345.0558, found 345.055

### 4-((2,3-Dichlorophenyl)(pyridin-2-ylamino)methyl)phenol (**S-4**)

mp = 195-196 °C;  $^1\text{H}$  NMR (300 MHz,  $\text{CDCl}_3$ )  $\delta$  8.07 (d,  $J$  = 5.2 Hz, 1H), 7.53 – 7.38 (m, 3H), 7.21 (t,  $J$  = 7.9 Hz, 1H), 7.01 (d,  $J$  = 8.4 Hz, 2H), 6.68 (dd,  $J$  = 7.2, 5.2 Hz, 1H), 6.19 (d,  $J$  = 8.3 Hz, 1H), 5.94 (d,  $J$  = 4.5 Hz, 1H), 5.32 (s, 1H);  $^{13}\text{C}$  NMR (75 MHz,  $\text{CDCl}_3$ )  $\delta$  156.4, 146.0, 141.1,



139.4, 133.7, 131.5, 130.6, 129.6, 129.2, 127.6, 126.1, 118.6, 116.0, 113.8, 107.0, 58.3; IR neat film: 3433, 3413, 2981, 2799, 2671, 2590, 1604, 1571, 1514, 1502  $\text{cm}^{-1}$ ; HRMS (ESI) calculated for  $[\text{C}_{18}\text{H}_{15}\text{Cl}_2\text{N}_2\text{O}]^+$ : 345.0558, found 345.0556.

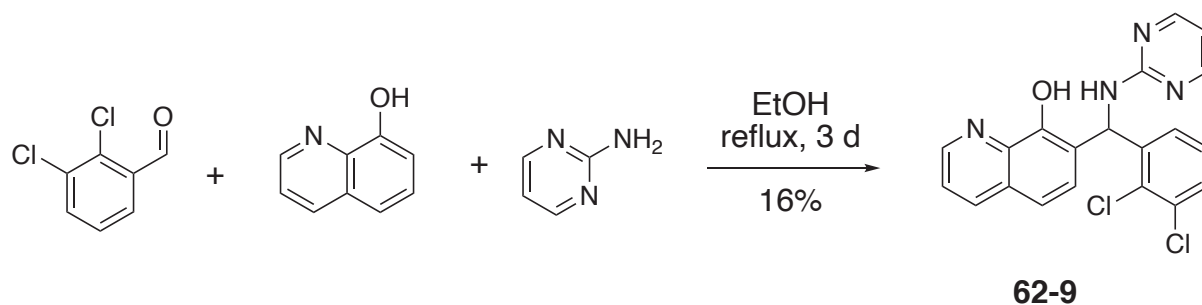

#### 7-((2,3-Dichlorophenyl)(pyrimidin-2-ylamino)methyl)quinolin-8-ol (**62-9**)

To a 50 mL pressure tube, 2-aminopyrimidine (54.6 mg, 0.57 mmol, 1.0 equiv) and 2,3-dichlorobenzaldehyde (100 mg, 0.57 mmol, 1.0 equiv) was dissolved in absolute ethanol (5 mL). Once fully dissolved, 8-hydroxyquinoline (100 mg, 0.69 mmol, 1.2 equiv) was added to the solution. The mixture was stirred at reflux for 72 h. The reaction was allowed to cool to rt and then concentrated. The crude mixture was purified by flash column chromatography (silica gel, 10%-20% acetone:hexanes gradient) to yield **62-9** as a white solid (37.5 mg, 16% yield). mp = 98-99 °C;  $^1\text{H}$  NMR (300 MHz,  $\text{CDCl}_3$ )  $\delta$  8.73 (d,  $J$  = 5.7 Hz, 1H), 8.25 (d,  $J$  = 4.8 Hz, 2H), 8.11 (d,  $J$  = 8.3 Hz, 1H), 7.60 (d,  $J$  = 7.8 Hz, 1H), 7.46 – 7.34 (m, 3H), 7.29 (s, 1H), 7.18 (t,  $J$  = 7.8 Hz, 1H), 7.04 (d,  $J$  = 7.7 Hz, 1H), 6.53 (t,  $J$  = 4.8 Hz, 1H), 6.35 (d,  $J$  = 7.7 Hz, 1H);  $^{13}\text{C}$  NMR (75 MHz,  $\text{CDCl}_3$ )  $\delta$  161.3, 158.1, 149.8, 148.1, 141.9, 138.2, 136.0, 133.4, 131.9, 129.2, 127.8, 127.5, 126.9, 126.6, 121.9, 121.4, 117.5, 111.3, 53.4; IR; HRMS (ESI) calculated for  $[\text{C}_{20}\text{H}_{15}\text{Cl}_2\text{N}_4\text{O}_1]^+$ : 397.0617, found 397.0619.

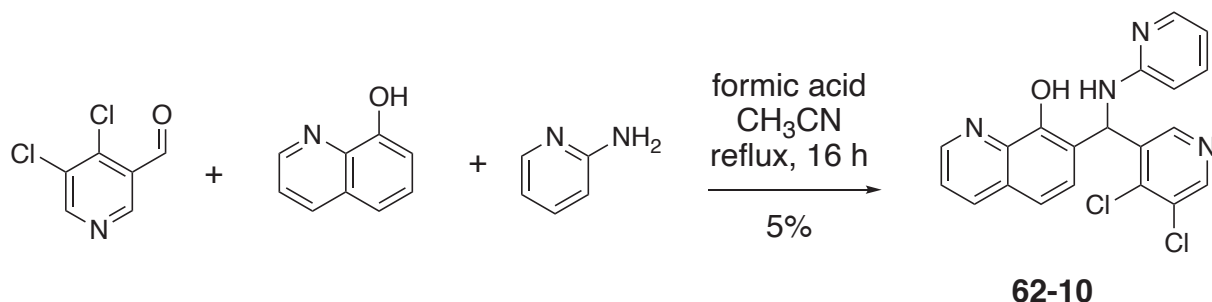

**7-((4,5-Dichloropyridin-3-yl)(pyridin-2-ylamino)methyl)quinolin-8-ol (62-10)**

To a 50 mL pressure tube, 2-aminopyridine (27 mg, 0.29 mmol, 1.0 equiv), 4,5-dichloronicotinaldehyde (50 mg, 0.29 mmol, 1.0 equiv.), and 8-hydroxyquinoline (50 mg, 0.34 mmol, 1.2 equiv) were dissolved in CH<sub>3</sub>CN (30 mL). Following the addition of formic acid (10  $\mu$ L, 0.23 mmol 0.80 equiv.), the solution was stirred at reflux for 16 h. The solution was allowed to cool to rt, concentrated, and the crude mixture was then directly purified by flash column chromatography (silica gel, 10-20% acetone:hexanes) to give **62-10** as a white solid (6 mg, 5% yield). mp = 102-103 °C; <sup>1</sup>H NMR (400 MHz, CDCl<sub>3</sub>)  $\delta$  8.83 – 8.67 (m, 2H), 8.52 (s, 1H), 8.13 (d, *J* = 8.3 Hz, 1H), 8.08 (d, *J* = 5.0 Hz, 1H), 7.55 – 7.34 (m, 3H), 7.31 (d, *J* = 8.5 Hz, 1H), 6.74 (d, *J* = 6.6 Hz, 1H), 6.61 (t, *J* = 7.2 Hz, 1H), 6.41 (d, *J* = 8.3 Hz, 1H), 5.53 (d, *J* = 6.5 Hz, 1H); <sup>13</sup>C NMR (75 MHz, CDCl<sub>3</sub>)  $\delta$  158.0, 149.7, 148.2, 148.1, 147.0, 143.5, 139.5, 138.0, 136.0, 127.8, 127.4, 124.9, 118.9, 118.1, 117.7, 117.6, 115.0, 113.0, 106.7, 53.2; HRMS (ESI) calc'd for [C<sub>20</sub>H<sub>15</sub>Cl<sub>2</sub>N<sub>4</sub>O], (M+H)<sup>+</sup>: 397.0623, found: 397.0618.

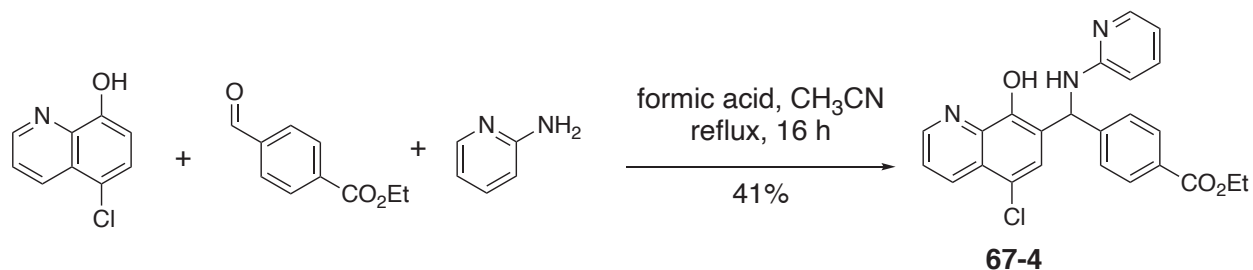

**Ethyl 4-((5-chloro-8-hydroxyquinolin-7-yl)(pyridin-2-ylamino)methyl)benzoate (67-4)**

To a 50 mL pressure tube, 2-aminopyridine (26 mg, 0.28 mmol, 1.0 equiv) ethyl 4-formylbenzoate (50 mg, 0.28 mmol, 1.0 equiv.), and 5-chloro-8-hydroxyquinoline (60 mg, 0.34 mmol, 1.2 equiv.) were dissolved in CH<sub>3</sub>CN (3 mL). Following the addition of formic acid (10  $\mu$ L, 0.28 mmol 1.0 equiv.), tube was capped and the solution was stirred at reflux for 16 h. The solution was allowed to cool to rt, concentrated, and the crude mixture was then directly purified by flash column chromatography (silica gel, 10-50% acetone:hexanes) to give **67-4** as a white solid (50 mg, 41% yield). mp = 50-51 C; <sup>1</sup>H NMR (300 MHz, CDCl<sub>3</sub>)  $\delta$  8.81 (d, *J* = 4.3 Hz, 1H), 8.47 (d, *J* = 8.6 Hz, 1H), 8.10 (d, *J* = 6.8 Hz, 1H), 8.00 (d, *J* = 8.1 Hz, 2H), 7.61 (s, 1H), 7.54 (d, *J* = 8.3 Hz, 3H), 7.39 (t, *J* = 8.7 Hz, 1H), 6.65 – 6.59 (m, 1H), 6.51 (d, *J* = 6.5 Hz, 1H), 6.43 (d, *J* = 8.4 Hz, 1H), 5.59 (d, *J* = 6.6 Hz, 1H), 4.35 (q, *J* = 7.1 Hz, 2H), 1.36 (t, *J* = 7.1 Hz, 3H).; <sup>13</sup>C NMR (75 MHz, CDCl<sub>3</sub>)  $\delta$  166.3, 157.5, 148.8, 148.4, 148.0, 146.5, 138.8, 137.8, 133.3, 130.0, 129.7, 127.0, 126.4, 125.7, 123.8, 122.6, 121.0, 113.9, 107.4, 60.9, 54.8, 14.31. IR neat film: 3292, 2977, 1717, 1603, 1574, 1509 cm<sup>-1</sup> HRMS (ESI) calculated for [C<sub>24</sub>H<sub>21</sub>ClN<sub>3</sub>O<sub>3</sub>]<sup>+</sup>: 434.1278, found 434.1279.

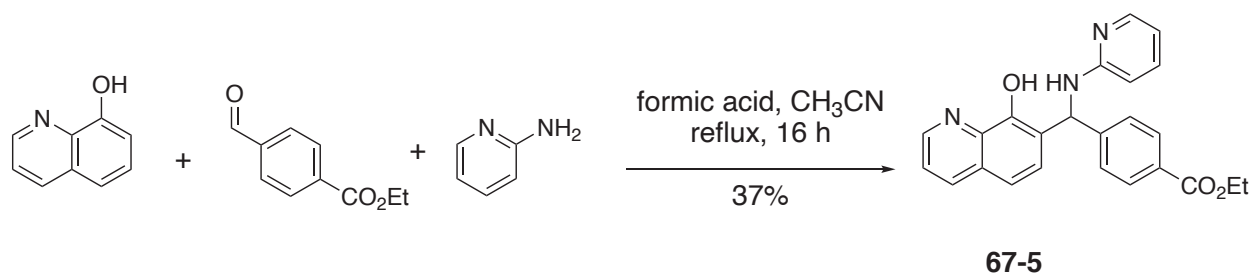**Ethyl 4-((8-hydroxyquinolin-7-yl)(pyridin-2-ylamino)methyl)benzoate (67-5)**

To a 50 mL pressure tube, 2-aminopyridine (26 mg, 0.28 mmol, 1.0 equiv) ethyl 4-formylbenzoate (50 mg, 0.29 mmol, 1.0 equiv.), and 8-hydroxyquinoline (50 mg, 0.34 mmol, 1.2 equiv.) were dissolved in CH<sub>3</sub>CN (30 mL). Following the addition of formic acid (10  $\mu$ L, 0.23 mmol 0.80

equiv.), the solution was stirred at reflux for 16 h. The solution was allowed to cool to rt, concentrated, and the crude mixture was then directly purified by flash column chromatography (silica gel, 10-20% acetone:hexanes) to give **67-5** as a white solid (42 mg, 37% yield). mp = 60-63 ° C;  $^1\text{H}$  NMR (400 MHz,  $\text{CDCl}_3$ )  $\delta$  8.76 (d,  $J$  = 2.6 Hz, 1H), 8.11 (d,  $J$  = 10.0 Hz, 1H), 8.05 (d,  $J$  = 3.5 Hz, 1H), 7.99 (d,  $J$  = 8.3 Hz, 2H), 7.57 (d,  $J$  = 8.5 Hz, 2H), 7.52 (d,  $J$  = 8.5 Hz, 1H), 7.42 (dd,  $J$  = 8.2, 4.4 Hz, 2H), 7.32 (d,  $J$  = 8.7 Hz, 1H), 6.65 – 6.58 (m, 1H), 6.57 – 6.46 (m, 2H), 6.28 (s, 1H), 4.34 (q,  $J$  = 7.2 Hz, 2H), 1.35 (t,  $J$  = 7.2 Hz, 3H);  $^{13}\text{C}$  NMR (101 MHz,  $\text{CDCl}_3$ )  $\delta$  166.3, 157.2, 149.1, 148.3, 146.7, 146.3, 138.7, 138.2, 136.1, 129.9, 129.5, 127.8, 126.9, 126.6, 122.8, 122.0, 118.4, 113.4, 107.7, 60.9, 54.9, 14.3. IR neat film: 3375, 2978, 2929, 1710, 1598, 1502  $\text{cm}^{-1}$ ; HRMS (ESI) calculated for  $[\text{C}_{24}\text{H}_{22}\text{N}_3\text{O}_3]^+$ : 400.1656, found 400.1656.

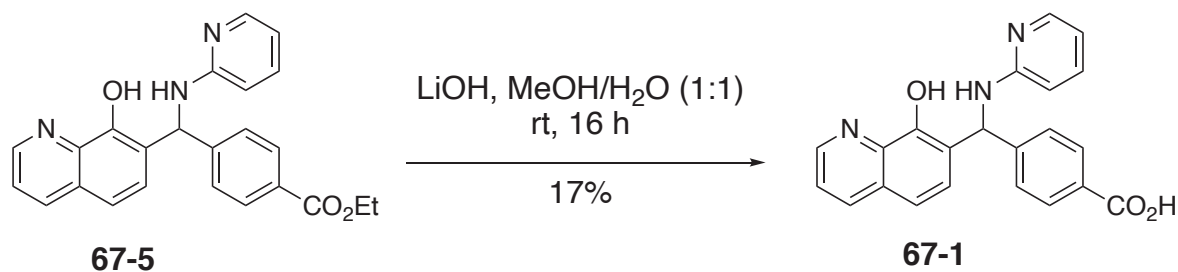

#### 4-((8-hydroxyquinolin-7-yl)(pyridin-2-ylamino)methyl)benzoic acid (**67-1**)

To a 20 mL scintillation vial, lithium hydroxide monohydrate (55 mg, 1.3 mmol, 2.7 equiv) was dissolved in 4 mL  $\text{H}_2\text{O}$  and 2 mL MeOH. Ester **67-5** (194 mg, 0.49 mmol, 1.0 equiv) was dissolved in 2 mL MeOH and added to the vial. The vial was capped and stirred at rt for 16 h. Then 2M HCl was added dropwise to the solution until a precipitate persisted. Do not add too much HCl, as the product will dissolve. The precipitate was filtered, washed with 5 mL cold water, 5 mL cold  $\text{Et}_2\text{O}$ , and collected to give **67-1** as a white solid (30.2 mg, 17% yield). mp = 140-142 ° C;  $^1\text{H}$  NMR (300 MHz,  $\text{CD}_3\text{OD}$ )  $\delta$  8.77 (d,  $J$  = 5.9 Hz, 1H), 8.17 (d,  $J$  = 6.7 Hz, 1H), 7.94 (d,  $J$  = 8.2 Hz, 3H), 7.56

– 7.40 (m, 5H), 7.32 (d,  $J = 8.6$  Hz, 1H), 6.67 (t,  $J = 4.3$  Hz, 2H), 6.58 (t,  $J = 6.2$  Hz, 1H);  $^{13}\text{C}$  NMR (75 MHz,  $\text{CD}_3\text{OD}$ )  $\delta$  170.6, 159.2, 151.4, 149.8, 148.7, 147.4, 140.1, 139.6, 137.4, 131.7, 131.0, 130.8, 129.6, 128.6, 128.4, 128.0, 125.5, 123.1, 119.3, 114.3, 110.4, 55.2; IR neat film: 3315, 2925, 1652, 1608, 1574  $\text{cm}^{-1}$ ; HRMS (ESI) calculated for  $[\text{C}_{22}\text{H}_{18}\text{N}_3\text{O}_3]^+$ : 372.1343, found 372.1343.

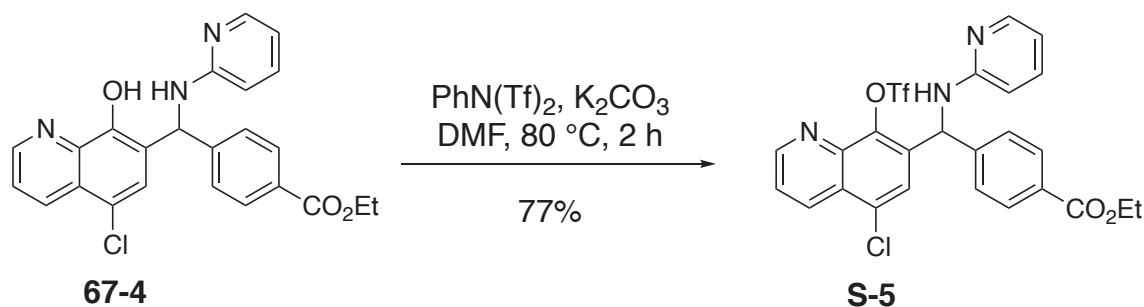

**Ethyl 4-((5-chloro-8-(((trifluoromethyl)sulfonyl)oxy)quinolin-7-yl)(pyridin-2-ylamino)methyl)benzoate (S-5)**

In a 50 mL pressure tube, **67-4** (440 mg, 1.0 mmol, 1.0 equiv.) was dissolved in dry DMF (5 mL) under argon atmosphere. *N*-Phenyl-bis(trifluoromethanesulfonimide) (537 mg, 1.51 mmol, 1.5 equiv.) and potassium carbonate (208 mg, 1.50 mmol, 1.5 equiv.) were added and the solution was 80 °C for 2 h. The solution was then cooled to rt, diluted with EtOAc, and washed three times with  $\text{H}_2\text{O}$ . The organic layer was dried over  $\text{Na}_2\text{SO}_4$ , and then concentrated. The crude mixture was purified by flash column chromatography (silica gel, 30% EtOAc:hexanes) to yield **S-5** as a yellow solid (451 mg, 77% yield). mp = 167-169 °C;  $^1\text{H}$  NMR (400 MHz,  $\text{CDCl}_3$ )  $\delta$  9.04 (d,  $J = 4.2$  Hz, 1H), 8.55 (d,  $J = 7.0$  Hz, 1H), 8.11 – 7.99 (m, 3H), 7.78 (s, 1H), 7.62 (dd,  $J = 8.5, 4.3$  Hz, 1H), 7.43 (d,  $J = 8.2$  Hz, 3H), 6.66 (dd,  $J = 7.2, 5.0$  Hz, 1H), 6.53 (d,  $J = 5.1$  Hz, 1H), 6.41 (d,  $J = 8.3$  Hz, 1H), 5.25 (d,  $J = 5.3$  Hz, 1H), 4.36 (q,  $J = 7.1$  Hz, 2H), 1.37 (t,  $J = 7.1$  Hz, 3H);  $^{13}\text{C}$  NMR (101 MHz,  $\text{CDCl}_3$ )  $\delta$  166.0, 156.8, 151.6, 148.3, 144.5, 137.9, 135.3, 133.0, 131.7, 130.4, 130.3, 127.4,

126.9, 125.2, 123.3, 114.7, 107.1, 61.1, 54.6, 14.3; IR neat film: 3379, 3066, 3001, 2980, 1725, 1603, 1601  $\text{cm}^{-1}$ ; HRMS (ESI) calculated for  $[\text{C}_{25}\text{H}_{20}\text{ClF}_3\text{N}_3\text{O}_5\text{S}]^+$ : 566.0759, found 566.0765.

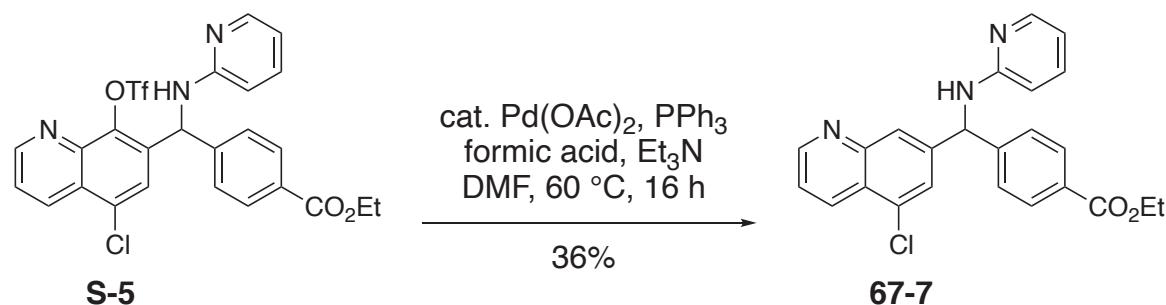

### Ethyl 4-((5-chloroquinolin-7-yl)(pyridin-2-ylamino)methyl)benzoate (**67-7**)

In a 50 mL pressure tube, **S-5** (400 mg, 0.75 mmol, 1.0 equiv.),  $\text{Pd(OAc)}_2$  (10 mg, 0.045 mmol, 0.06 equiv.), triphenylphosphine (23 mg, 0.088 mmol, 0.12 equiv.), and triethylamine (0.4 mL, 0.51 mmol, 3.8 equiv.) were combined in dry DMF (5 mL) under argon atmosphere.<sup>9</sup> Formic acid (70  $\mu\text{L}$ , 1.86 mmol, 2.5 equiv.) was added, and the reaction was capped and stirred at 60  $^\circ\text{C}$  for 16 h. Upon cooling to rt, the reaction mixture was diluted with brine and extracted with EtOAc. The organic layer was then washed three times with brine. The organic layer was dried over  $\text{Na}_2\text{SO}_4$  and then concentrated. The crude mixture was purified by flash column chromatography (silica gel, 30% EtOAc:hexanes gradient) to yield **67-7** as a yellow solid (106 mg, 36% yield). mp = 56–57  $^\circ\text{C}$ ;  $^1\text{H}$  NMR (300 MHz,  $\text{CDCl}_3$ )  $\delta$  8.91 (d,  $J$  = 4.3 Hz, 1H), 8.52 (d,  $J$  = 8.1 Hz, 1H), 8.07 (d,  $J$  = 4.4 Hz, 1H), 8.02 (d,  $J$  = 8.2 Hz, 3H), 7.60 (s, 1H), 7.51 – 7.43 (m, 3H), 7.39 (d,  $J$  = 6.8 Hz, 1H), 6.62 (d,  $J$  = 6.6 Hz, 1H), 6.39 (d,  $J$  = 8.3 Hz, 1H), 6.22 (d,  $J$  = 6.0 Hz, 1H), 5.25 (d,  $J$  = 6.1 Hz, 1H), 4.36 (q,  $J$  = 7.1 Hz, 2H), 1.37 (t,  $J$  = 7.1 Hz, 3H).  $^{13}\text{C}$  NMR (75 MHz,  $\text{CDCl}_3$ )  $\delta$  166.1, 157.1, 151.4, 148.8, 148.2, 146.3, 143.7, 137.6, 132.7, 132.0, 130.2, 130.1, 127.6, 126.6, 126.3, 125.7, 122.0, 114.1, 107.7, 61.0, 59.7, 14.3; IR neat film: 3268, 2925, 2980, 1713, 1601, 1478  $\text{cm}^{-1}$ ; HRMS (ESI) calculated for  $[\text{C}_{24}\text{H}_{20}\text{ClN}_3\text{NaO}_2]^+$ : 440.1136, found 440.1143.

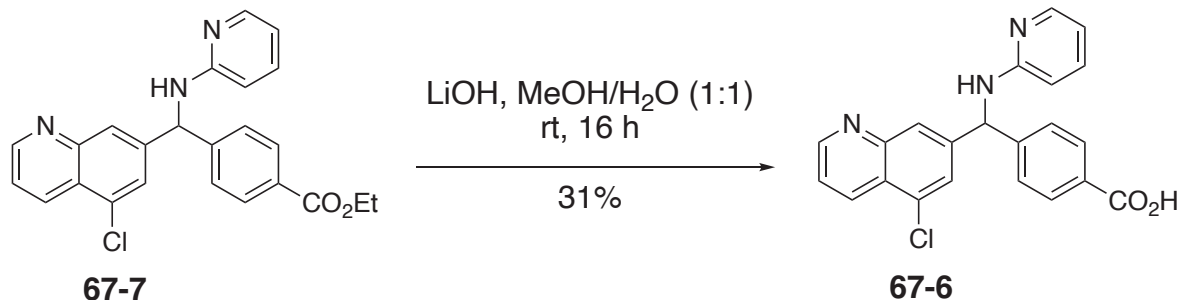

#### Ethyl 4-((5-chloroquinolin-7-yl)(pyridin-2-ylamino)methyl)benzoate (**67-6**)

To a 20 mL scintillation vial, lithium hydroxide monohydrate (30 mg, 0.71 mmol, 3.5 equiv) was dissolved in 2 mL H<sub>2</sub>O and 1 mL MeOH. Ester **67-7** (86 mg, 0.21 mmol, 1.0 equiv) was dissolved in 1 mL MeOH and added to the vial. The vial was capped and stirred at rt for 16 h. Then 2M HCl was added dropwise to the solution until a precipitate persisted. The precipitate was filtered, washed with 5 mL cold water, 5 mL cold ether, and collected to give **67-6** as a white solid (24.5 mg, 31% yield). mp = 136-137 °C; <sup>1</sup>H NMR (400 MHz, CD<sub>3</sub>OD) δ 8.84 (d, *J* = 6.1 Hz, 1H), 8.59 (d, *J* = 8.5 Hz, 1H), 8.00 (d, *J* = 8.0 Hz, 2H), 7.97 – 7.87 (m, 2H), 7.70 (d, *J* = 1.7 Hz, 1H), 7.59 (dd, *J* = 8.5, 4.2 Hz, 1H), 7.47 (dd, *J* = 19.4, 7.4 Hz, 3H), 6.72 (d, *J* = 8.5 Hz, 1H), 6.59 (t, *J* = 6.2 Hz, 1H), 6.46 (s, 1H); <sup>13</sup>C NMR (101 MHz, CD<sub>3</sub>OD) δ 169.8, 159.0, 152.5, 149.6, 148.1, 147.8, 146.5, 139.3, 134.6, 132.9, 131.7, 131.4, 129.2, 128.4, 127.0, 126.9, 123.6, 114.5, 111.1, 59.9; IR neat film: 3277, 2981, 1671, 1606, 1482 cm<sup>-1</sup>; HRMS (ESI) calculated for [C<sub>22</sub>H<sub>17</sub>ClN<sub>3</sub>O<sub>2</sub>] 390.1004, found 390.1011.

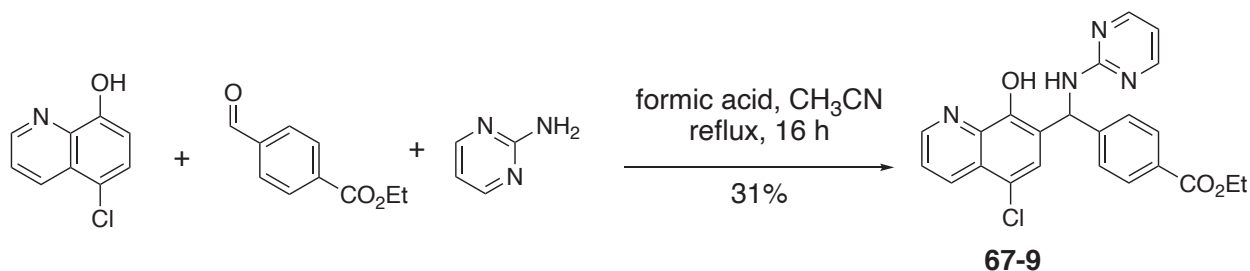

#### Ethyl 4-((5-chloro-8-hydroxyquinolin-7-yl)(pyrimidin-2-ylamino)methyl)benzoate (**67-9**)

To a 250 mL dry round bottomed flask equipped with a reflux condenser, 2-aminopyrimidine (4.3 g, 45.3 mmol, 1.2 equiv), ethyl 4-formylbenzoate (6.8 g, 38.2 mmol, 1.0 equiv.), and 5-chloro-8-hydroxyquinoline (8.2 g, 45.8 mmol, 1.2 equiv.) were dissolved in CH<sub>3</sub>CN (100 mL). Following the addition of formic acid (1.4 mL, 37.1 mmol 1.0 equiv.), the solution was stirred at reflux for 16 h. The solution was allowed to cool to rt, concentrated, resuspended in acetone. The heterogenous mixture was filtered, and the precipitate was washed with cold acetone and hexanes to give **67-9** as a white solid (5.2 g, 31% yield). mp = 150-151 °C; <sup>1</sup>H NMR (300 MHz, CDCl<sub>3</sub>) δ 8.80 (d, *J* = 4.2 Hz, 1H), 8.49 (d, *J* = 8.6 Hz, 1H), 8.30 (d, *J* = 4.8 Hz, 2H), 7.99 (d, *J* = 7.9 Hz, 2H), 7.55 (dd, *J* = 19.6, 10.2 Hz, 4H), 6.79 (d, *J* = 8.2 Hz, 1H), 6.58 (t, *J* = 4.9 Hz, 1H), 6.39 (d, *J* = 8.3 Hz, 1H), 4.34 (q, *J* = 7.2 Hz, 2H), 1.36 (t, *J* = 7.2 Hz, 3H); <sup>13</sup>C NMR (75 MHz, CDCl<sub>3</sub>) δ 166.3, 161.5, 158.2, 148.7, 148.5, 146.6, 138.7, 133.3, 129.8, 129.4, 127.0, 126.8, 125.6, 123.6, 122.5, 120.7, 111.5, 60.9, 54.8, 14.3; IR neat film: 3293, 2978, 1716, 1583, 1496 cm<sup>-1</sup>; HRMS (ESI) calculated for [C<sub>23</sub>H<sub>20</sub>ClN<sub>4</sub>O<sub>3</sub>] 390.1004, found 390.1011.



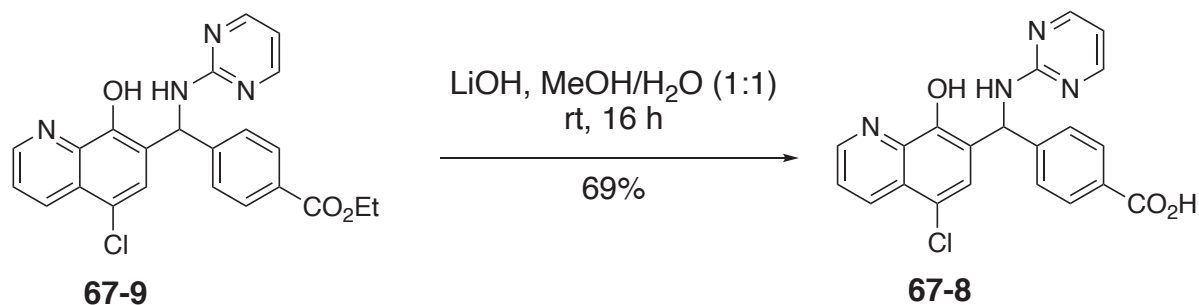

**4-((5-Chloro-8-hydroxyquinolin-7-yl)(pyrimidin-2-ylamino)methyl)benzoic acid (**67-8**)**

To a 20 mL scintillation vial, lithium hydroxide monohydrate (54 mg, 1.29 mmol, 5.6 equiv.) was dissolved in 2 mL H<sub>2</sub>O and 1 mL MeOH. Ester **67-9** (100 mg, 0.21 mmol, 1.0 equiv.) was dissolved in 1 mL MeOH and added to the vial. The vial was capped and stirred at rt for 16 h. Then 2M HCl was added dropwise to the solution until a precipitate persisted. The precipitate was filtered, washed with 5 mL cold water, 5 mL cold ether, and collected to give **67-8** as a brown solid (65 mg, 31% yield). mp = 174-176 °C; <sup>1</sup>H NMR (300 MHz, DMSO-*d*<sub>6</sub>) δ 10.47 (s, 1H), 8.95 (s, 1H), 8.46 (d, *J* = 8.5 Hz, 1H), 8.30 (t, *J* = 7.9 Hz, 3H), 8.03 – 7.79 (m, 3H), 7.79 – 7.62 (m, 1H), 7.46 (d, *J* = 7.9 Hz, 2H), 7.05 (d, *J* = 9.4 Hz, 1H), 6.63 (d, *J* = 4.9 Hz, 1H); <sup>13</sup>C NMR (75 MHz, DMSO-*d*<sub>6</sub>) δ 167.4, 161.6, 158.2, 149.6, 149.1, 146.9, 138.7, 132.5, 129.4, 127.0, 126.6, 125.5, 124.9, 123.0, 111.0, 51.4; IR neat film: 3291, 1673, 1576, 1501 cm<sup>-1</sup>; HRMS (ESI) calculated for [C<sub>21</sub>H<sub>16</sub>ClN<sub>4</sub>O<sub>3</sub>] 407.0905, found 407.0913.

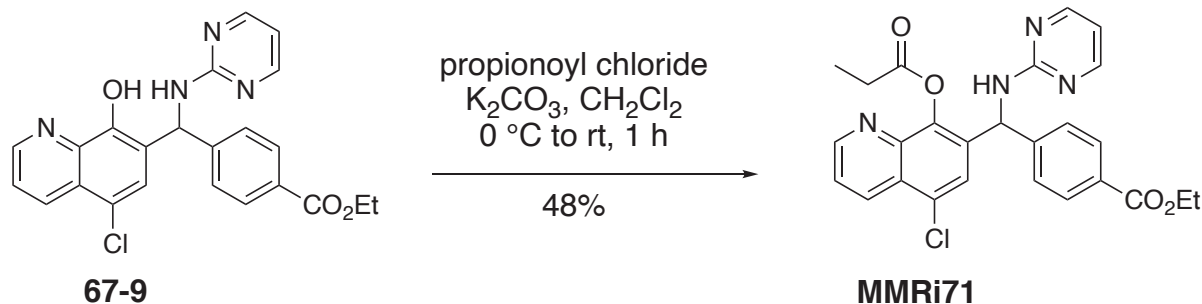

**Ethyl 4-((8-(propionyloxy)quinolin-7-yl)(pyrimidin-2-ylamino)methyl)benzoate (MMRI71)**

In a 5 mL dry round bottomed flask, **67-9** (5.0 g, 11.5 mmol, 1.0 equiv.) was dissolved in of dry  $\text{CH}_2\text{Cl}_2$  (100 mL) under argon atmosphere. Potassium carbonate (3.18 g, 23.0 mmol, 2.0 equiv.) was added and the solution was cooled to 0 °C. Propionoyl chloride (1.0 mL, 11.5 mmol, 1.0 equiv.) was then added to the solution. The mixture was allowed to warm to rt and stirred for 1 h. The reaction mixture was then filtered through celite and washed with  $\text{CH}_2\text{Cl}_2$ . The supernatant was then treated with 1 g DMT-functionalized silica gel and stirred for 15 minutes. The mixture was filtered and concentrated. The resulting crude solid was resuspended in ether and washed with distilled water. The organic layer was dried over  $\text{Na}_2\text{SO}_4$  and then concentrated. The crude mixture was purified by flash column chromatography (silica gel, 50%  $\text{Et}_2\text{O}$  : hexanes) to yield **MMRI71** as a greenish white solid (2.53 g, 48% yield). mp = 178-179 °C;  $^1\text{H}$  NMR (400 MHz,  $\text{CDCl}_3$ )  $\delta$  8.91 (d,  $J$  = 2.8 Hz, 1H), 8.50 (d,  $J$  = 6.8 Hz, 1H), 8.23 (d,  $J$  = 4.8 Hz, 2H), 8.00 (d,  $J$  = 8.4 Hz, 2H), 7.54 (s, 1H), 7.50 (dd,  $J$  = 8.5, 4.2 Hz, 1H), 7.43 (d,  $J$  = 8.1 Hz, 2H), 6.83 (d,  $J$  = 7.8 Hz, 1H), 6.57 (t,  $J$  = 4.8 Hz, 1H), 6.10 (d,  $J$  = 7.8 Hz, 1H), 4.36 (q,  $J$  = 7.1 Hz, 2H), 2.68 (q,  $J$  = 7.6 Hz, 2H), 1.37 (t,  $J$  = 7.1 Hz, 3H), 1.20 (t,  $J$  = 7.5 Hz, 3H);  $^{13}\text{C}$  NMR (101 MHz,  $\text{CDCl}_3$ )  $\delta$  172.2, 166.2, 161.3, 158.1, 151.2, 145.5, 144.6, 142.0, 134.3, 133.0, 130.0, 129.8, 129.0, 127.1, 126.7, 125.7, 122.4, 111.8, 61.0, 53.8, 27.3, 14.3, 9.0. IR neat film: 3270, 2982, 1773, 1716, 1578, 1491  $\text{cm}^{-1}$ ; HRMS (ESI) calculated for  $[\text{C}_{26}\text{H}_{23}\text{ClN}_4\text{NaO}_4]$  513.1300, found 513.1307.

Data File C:\Chem32\1\Data\Luke\MMRi71\_HPLCTrace 2022-10-21 14-43-04.D  
Sample Name: MMRi71\_HPLCTrace

=====

Acq. Operator : SYSTEM  
Sample Operator : SYSTEM  
Acq. Instrument : Terry Location : 1  
Injection Date : 10/21/2022 2:43:04 PM Inj Volume : Manually

Acq. Method : C:\CHEM32\1\METHODS\LD\_P262.M  
Last changed : 10/21/2022 2:26:14 PM by SYSTEM  
(modified after loading)

Analysis Method : C:\CHEM32\1\METHODS\AK\_1\_63\_ester.M  
Last changed : 10/24/2022 12:20:41 PM by SYSTEM  
(modified after loading)

Additional Info : Peak(s) manually integrated

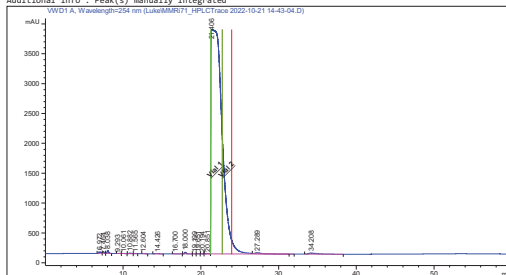

=====

Fraction Information

=====

Fraction List

=====

| Frac # | Well # | Location | Volume [ul] | BeginTime [min] | EndTime [min] | Reason   | Mass |
|--------|--------|----------|-------------|-----------------|---------------|----------|------|
| 1      | 1      | Vial 1   | 15000.00    | 21.264          | 22.764        | VMD1     |      |
| 1      | 1      | Vial 2   | 12226.67    | 22.778          | 23.981        | Overflow |      |

=====

Terry 10/24/2022 12:20:46 PM SYSTEM

Page 1 of 2

MMRi71 HPLC trace, >95% pure

Data File C:\Chem32\1\Data\Luke\MMRi71\_HPLCTrace 2022-10-21 14-43-04.D  
Sample Name: MMRi71\_HPLCTrace

=====

Area Percent Report

=====

Sorted By : Signal  
Multiplier : 1.0000  
Dilution : 1.0000  
Use Multiplier & Dilution Factor with ISTDs

Signal 1: VMD1 A, Wavelength=254 nm

| Peak # | RetTime [min] | Type | Width [min] | Area [mAU*s] | Height [mAU] | Area %   |
|--------|---------------|------|-------------|--------------|--------------|----------|
| 1      | 6.972         | BV   | 0.2672      | 480.75177    | 26.06481     | 0.1291   |
| 2      | 7.464         | VB   | 0.1571      | 294.47696    | 27.45437     | 0.0791   |
| 3      | 8.038         | BB   | 0.1747      | 560.89160    | 48.56438     | 0.1506   |
| 4      | 9.293         | VB   | 0.2081      | 36.80785     | 2.49552      | 9.881e-3 |
| 5      | 10.061        | BB   | 0.1931      | 42.67840     | 3.43127      | 0.0115   |
| 6      | 10.882        | BV   | 0.2126      | 148.04672    | 10.49339     | 0.0397   |
| 7      | 11.565        | VB   | 0.2439      | 40.99703     | 2.39274      | 0.0110   |
| 8      | 12.604        | BB   | 0.2147      | 36.51181     | 2.55504      | 9.802e-3 |
| 9      | 14.426        | BB   | 0.3958      | 127.56663    | 4.27884      | 0.0342   |
| 10     | 16.700        | BB   | 0.3476      | 47.97471     | 1.97325      | 0.0129   |
| 11     | 18.000        | BB   | 0.2769      | 485.77301    | 26.61434     | 0.1304   |
| 12     | 19.199        | BV   | 0.2564      | 41.51525     | 2.51803      | 0.0111   |
| 13     | 19.651        | VB   | 0.2566      | 86.28642     | 5.22560      | 0.0232   |
| 14     | 20.194        | BB   | 0.2398      | 28.79559     | 1.91104      | 7.730e-3 |
| 15     | 20.851        | BV E | 0.3977      | 173.21483    | 6.12889      | 0.0465   |
| 16     | 21.406        | VV R | 1.1841      | 3.67756e5    | 3750.14941   | 98.7276  |
| 17     | 27.289        | VB E | 0.7139      | 794.78540    | 15.61395     | 0.2134   |
| 18     | 34.208        | BB   | 1.0974      | 1312.61426   | 17.21818     | 0.3524   |

Totals : 3.72496e5 3955.08305

=====

\*\*\* End of Report \*\*\*

## References:

1. McLean, L. R.; Zhang, Y.; Li, H.; Li, Z.; Lukasczyk, U.; Choi, Y. M.; Han, Z.; Prisco, J.; Fordham, J.; Tsay, J. T.; Reiling, S.; Vaz, R. J.; Li, Y., Discovery of covalent inhibitors for MIF tautomerase via cocrystal structures with phantom hits from virtual screening. *Bioorg. Med. Chem. Lett.* **2009**, *19*, 6717-6720.
2. Shergalis, A.; Xue, D.; Gharbia, F. Z.; Driks, H.; Shrestha, B.; Tanweer, A.; Cromer, K.; Ljungman, M.; Neamati, N., Characterization of Aminobenzylphenols as Protein Disulfide Isomerase Inhibitors in Glioblastoma Cell Lines. *J. Med. Chem.* **2020**, *63*, 10263-10286.
3. Weinert, E. E.; Dondi, R.; Colloredo-Melz, S.; Frankenfield, K. N.; Mitchell, C. H.; Freccero, M.; Roika, S. E., Substituents on Quinone Methides Strongly Modulate Formation and Stability of Their Nucleophilic Adducts. *J. Am. Chem. Soc.* **2006**, *128*, 11940-11947.
4. Kanizsai, I.; Madacsi, R.; Hackler Jr., L.; Gyuris, M.; Szebeni, G. J.; Huzian, O.; Puskas, L. G., Synthesis and Cytoprotective Characterization of 8-Hydroxyquinoline Betti Products. *Molecules* **2018**, *23*, 1934.
5. Pobbati, A. V.; Mejuch, T.; Chakraborty, S.; Karatas, H.; Bharath, S. R.; Gueret, S. M.; Goy, P. A.; Hahne, G.; Pahl, A.; Sievers, S.; Guccione, E.; Song, H.; Waldmann, H.; Hong, W., Identification of Quinolins as Activators of TEAD-Dependent Transcription. *ACS Chemical Biology* **2019**, *14*, 2909-2921.
6. Olyaei, A.; Sadeghpour, M., Recent advances in the synthesis and applications of Betti base (aminoalkylnaphthol) and bis-Betti base derivatives. *RSC Adv.* **2019**, *9*, 18467-18497.
7. Lim, C. K.; Popov, A. A.; Tselikov, G.; Heo, J.; Pliss, A.; Kim, S.; Kebashin, A. V.; Prasad, P. N., Organic Solvent and Surfactant Free Fluorescent Organic Nanoparticles by Laser Ablation of Aggregation-Induced Enhanced Emission Dyes. *Adv. Opt. Mat.* **2018**, *6*, 1800164.
8. Pauli, G. F.; Chen, S. N.; Simmler, C.; Lankin, D. C.; Godecke, T.; Jaki, B. U.; Friesen, J. B.; McAlpine, J. B.; Napolitano, J. G., Importance of Purity Evaluation and the Potential of Quantitative <sup>1</sup>H NMR as a Purity Assay. *J. Med. Chem.* **2014**, *57*, 9220-9231.
9. Chen, Q. Y.; He, Y. B.; Yang, Z. Y., A new method for reduction of phenyl fluoroalkanesulfonates to arenes catalyzed by palladium. *J. Chem. Soc. Chem. Commun.* **1986**, *18*, 1452-1453.
10. Andreu, R.; Ronda, J. C., Synthesis of 3,4-dihydro-2H-1,3-benzoxazines by condensation of 2-hydroxyaldehydes and primary amines: application to the synthesis of hydroxy-substituted and deuterium-labeled compounds. *Synth. Comm.* **2008**, *38*, 2316-2329.

## Supporting Information: Spectral Data of New Compounds

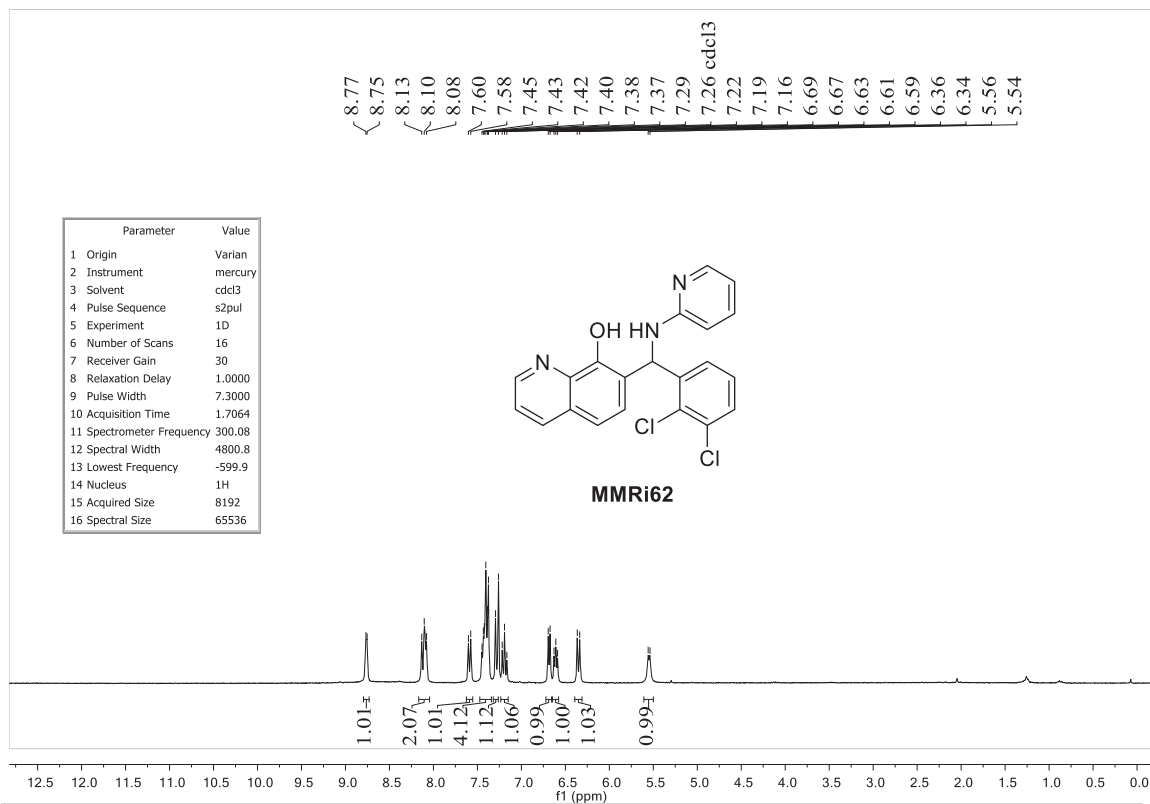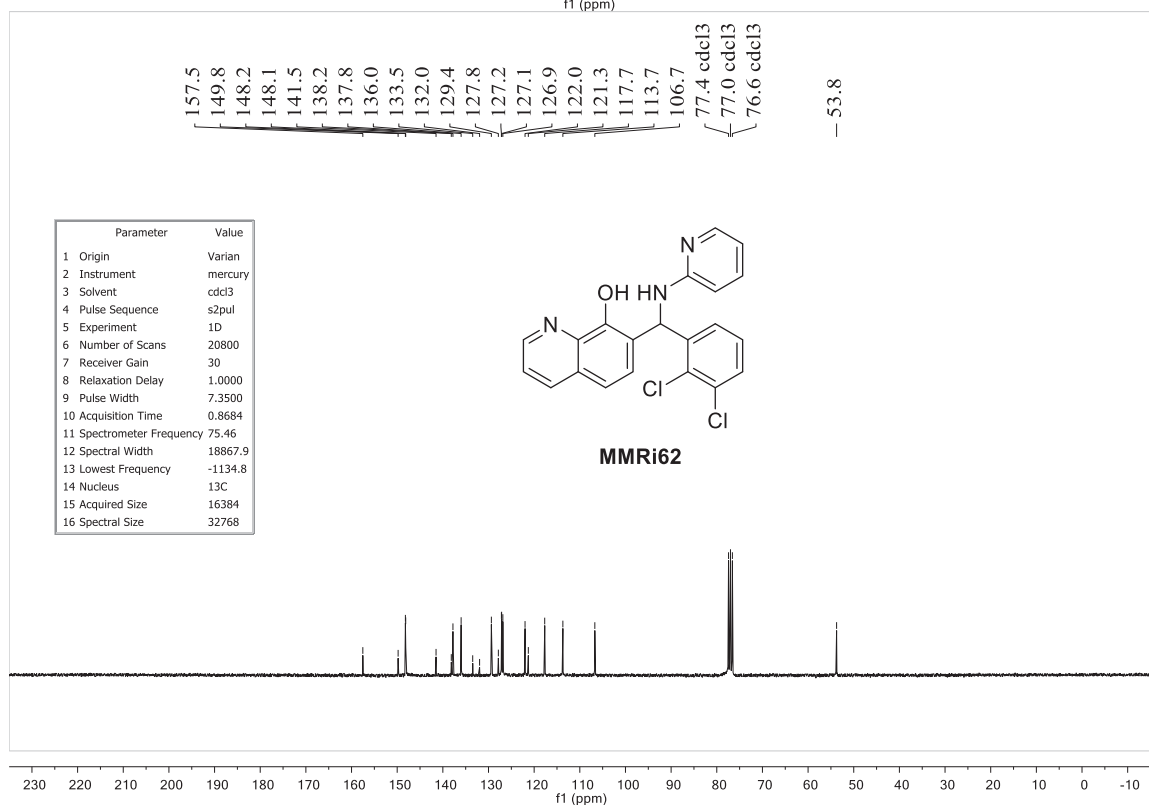

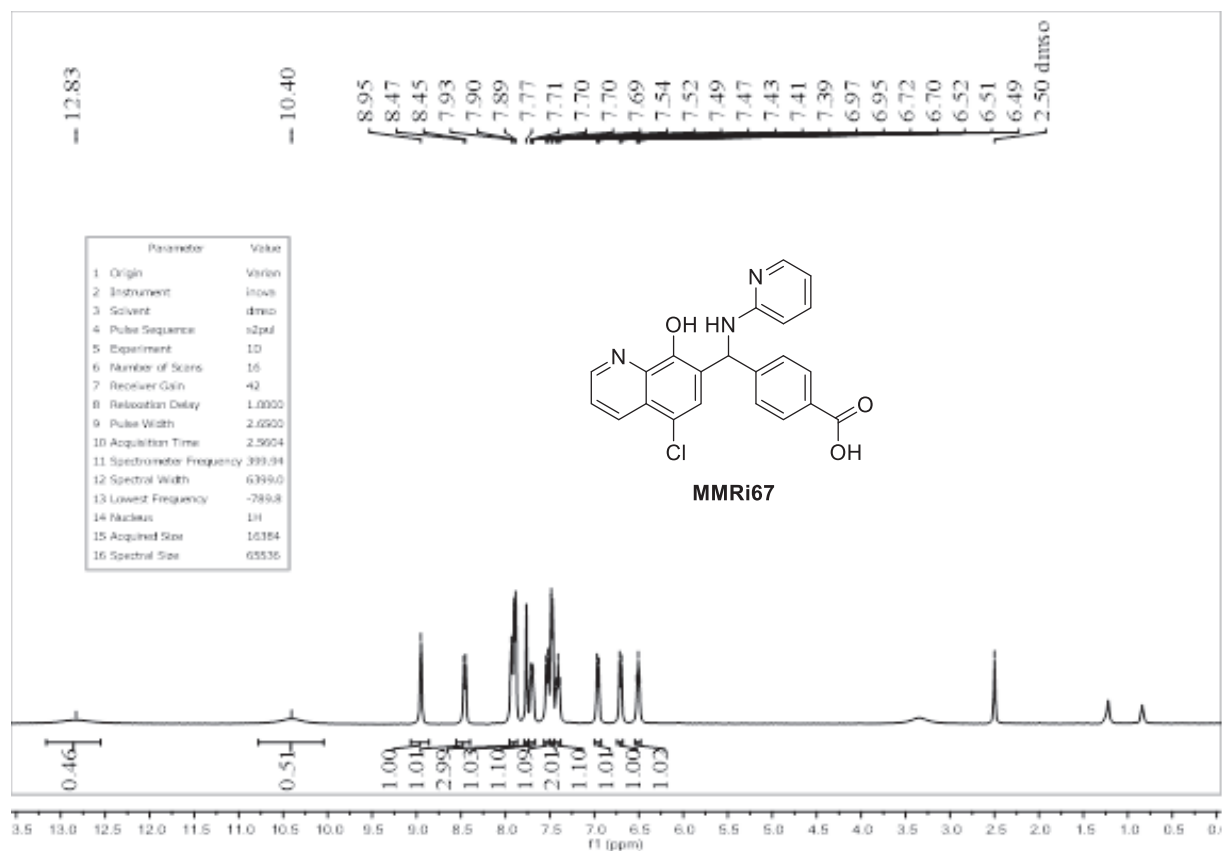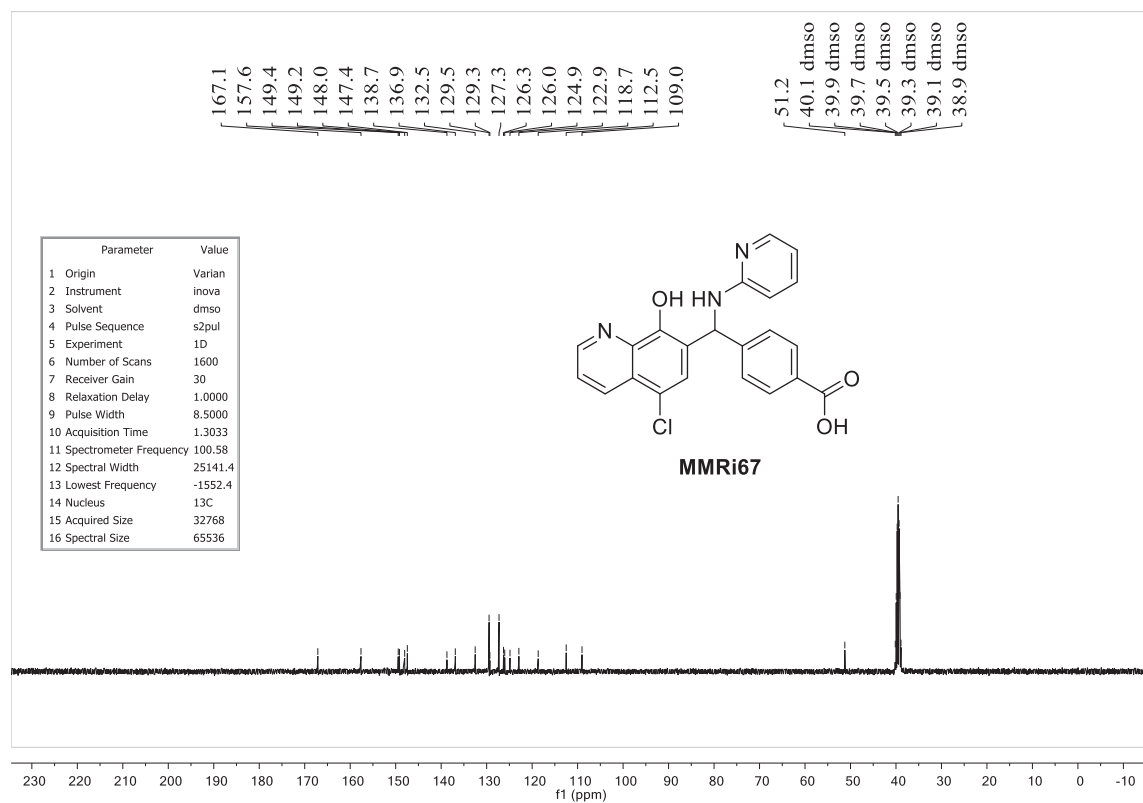

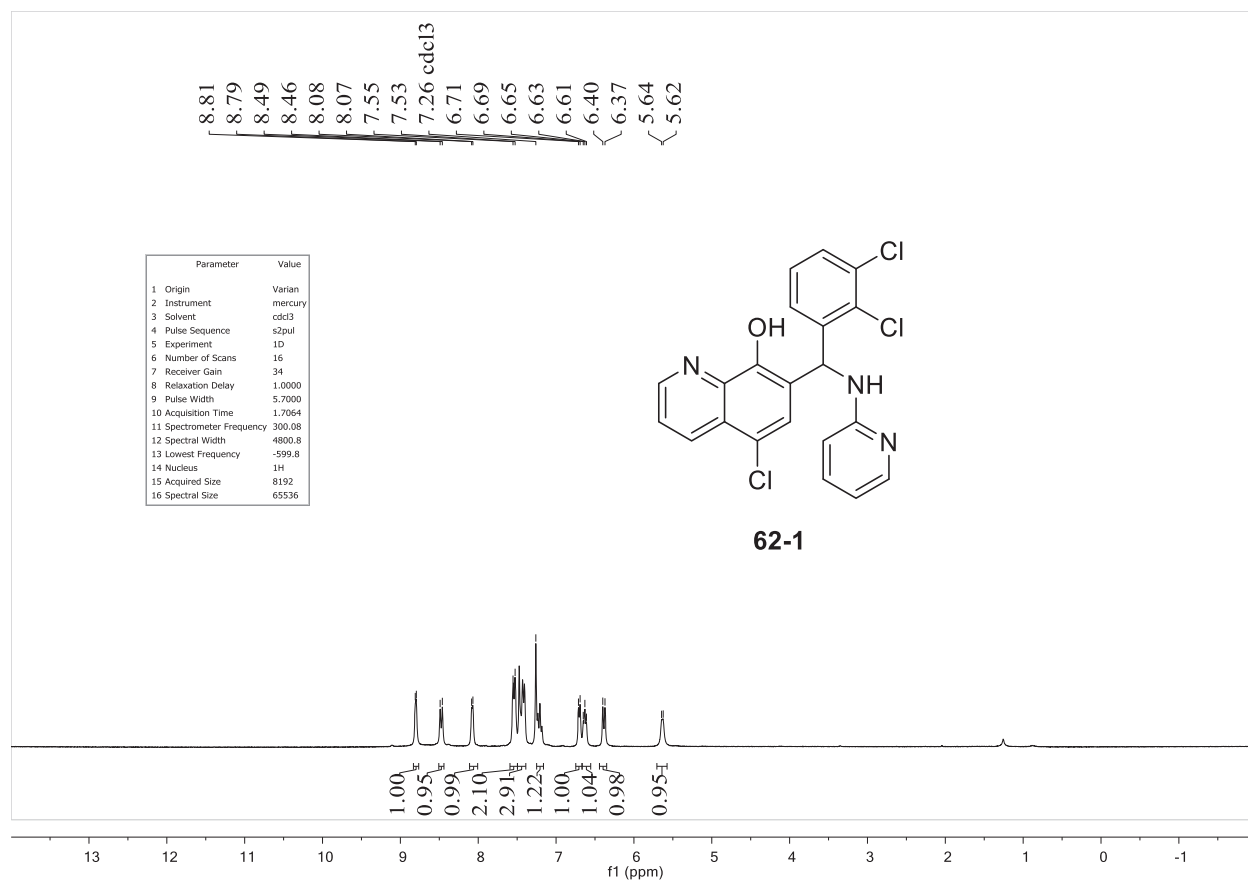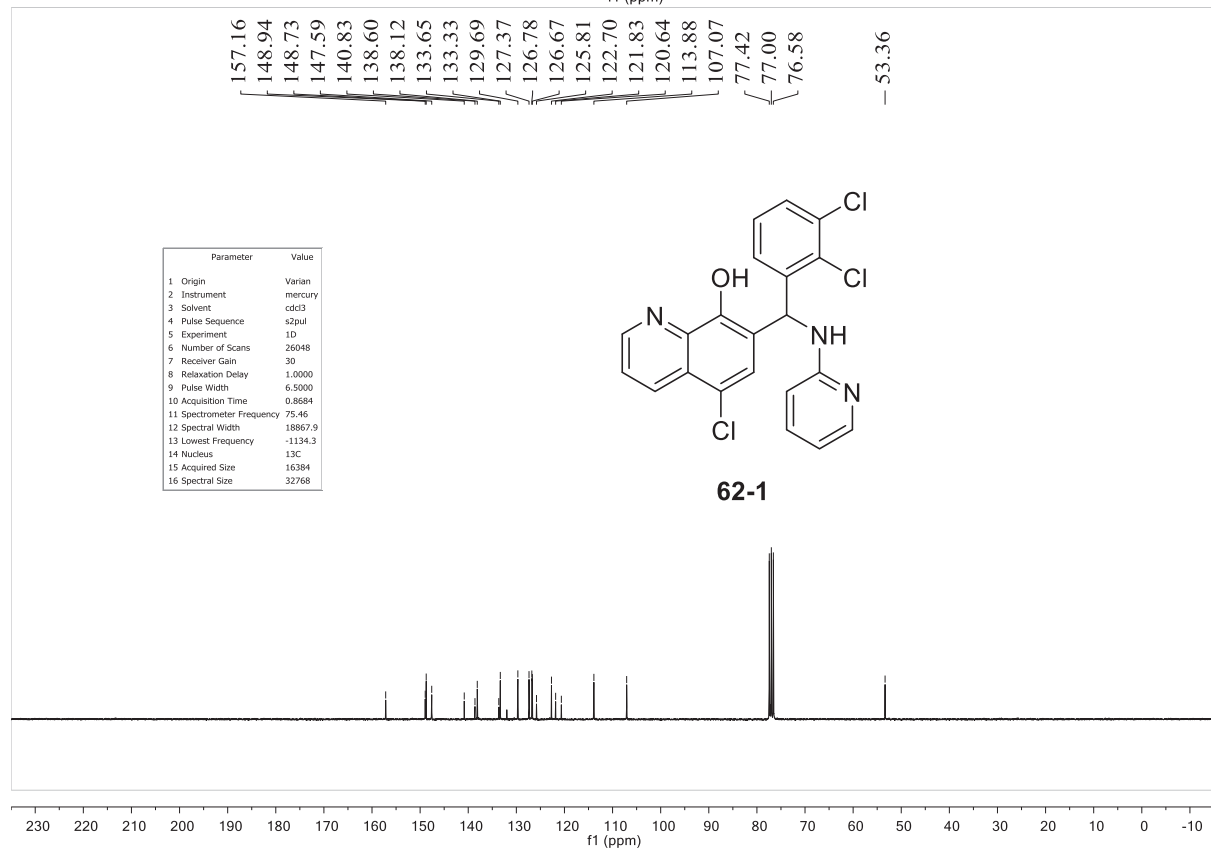

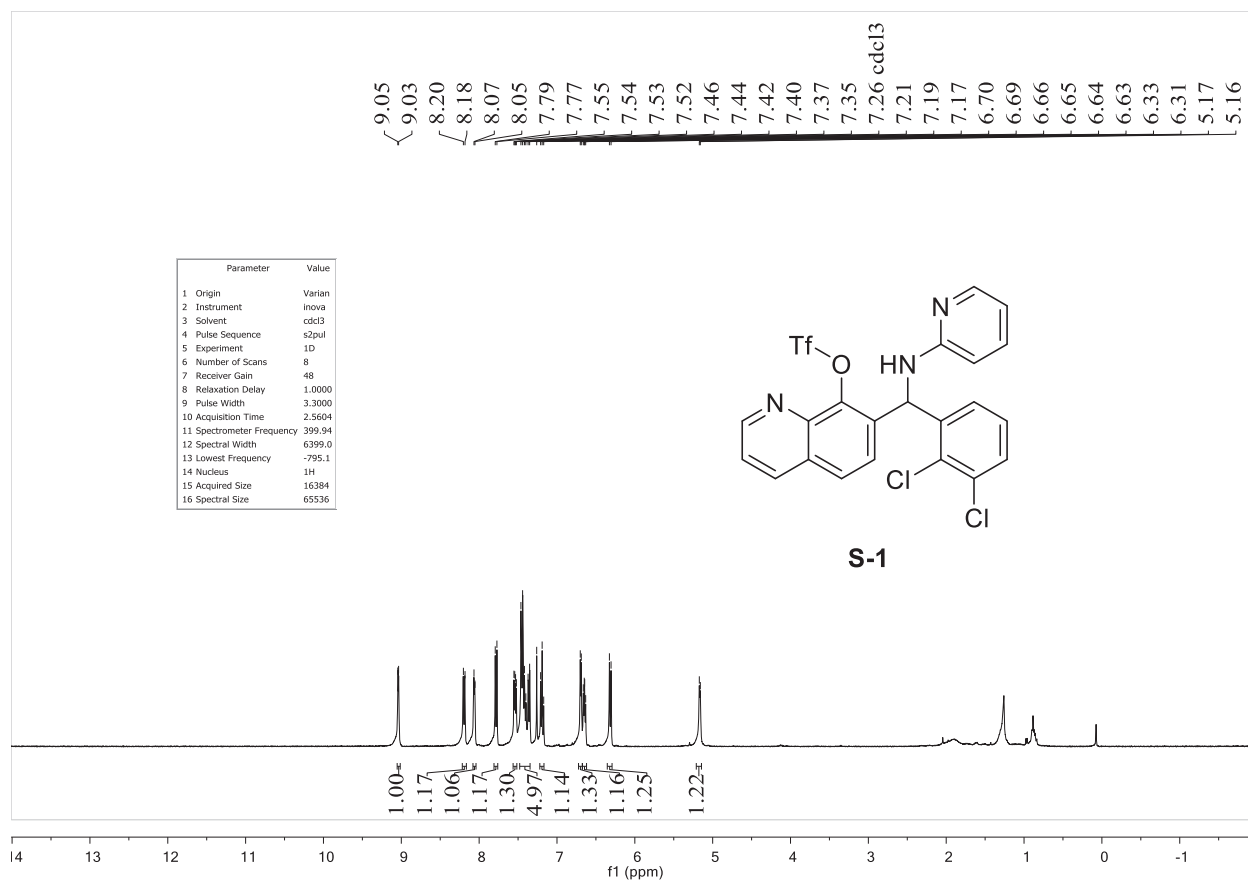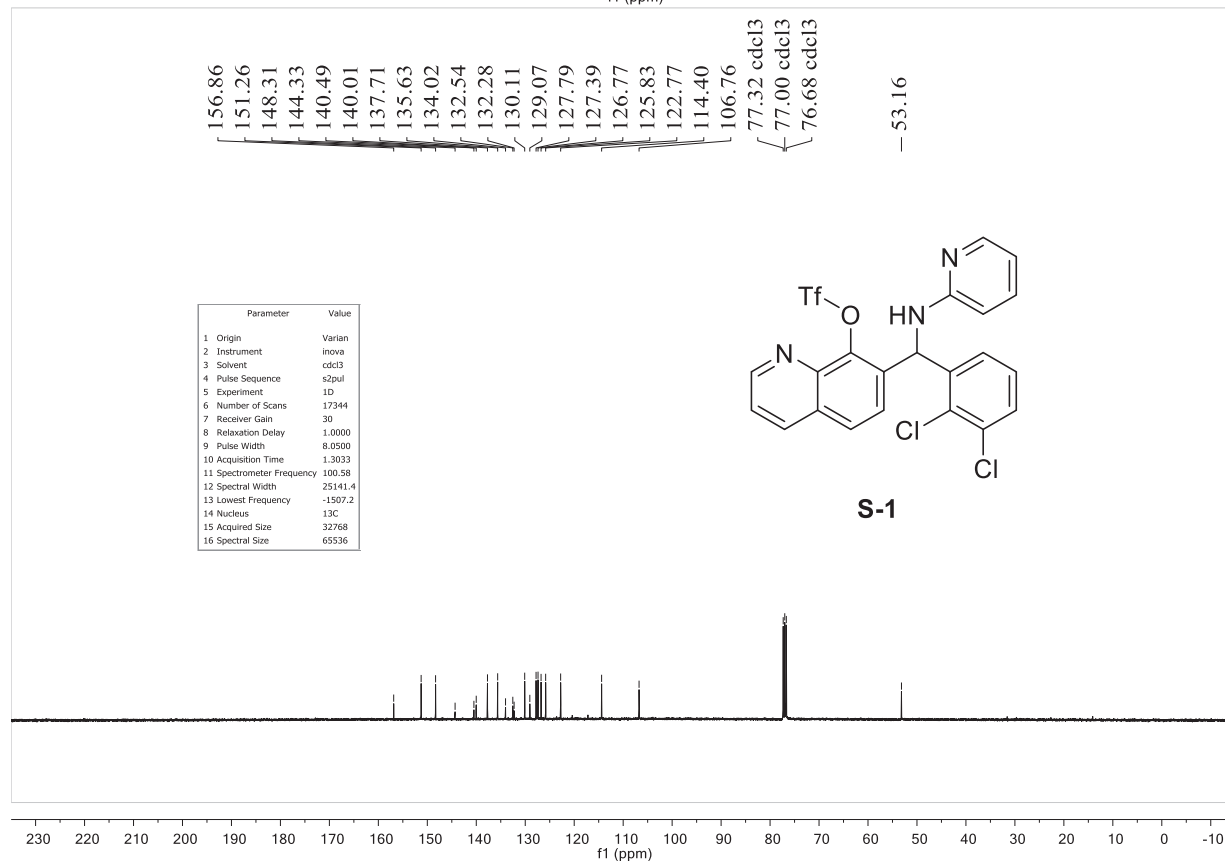



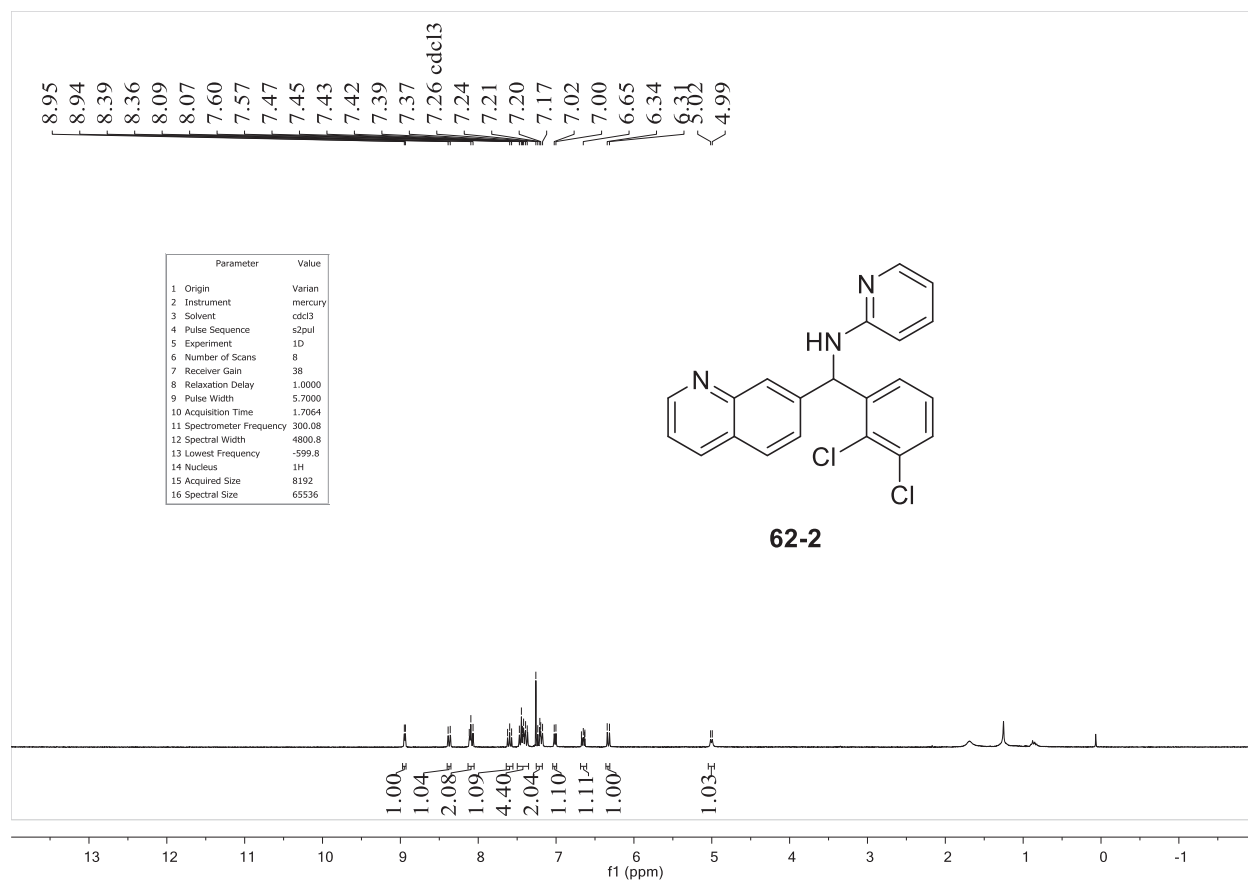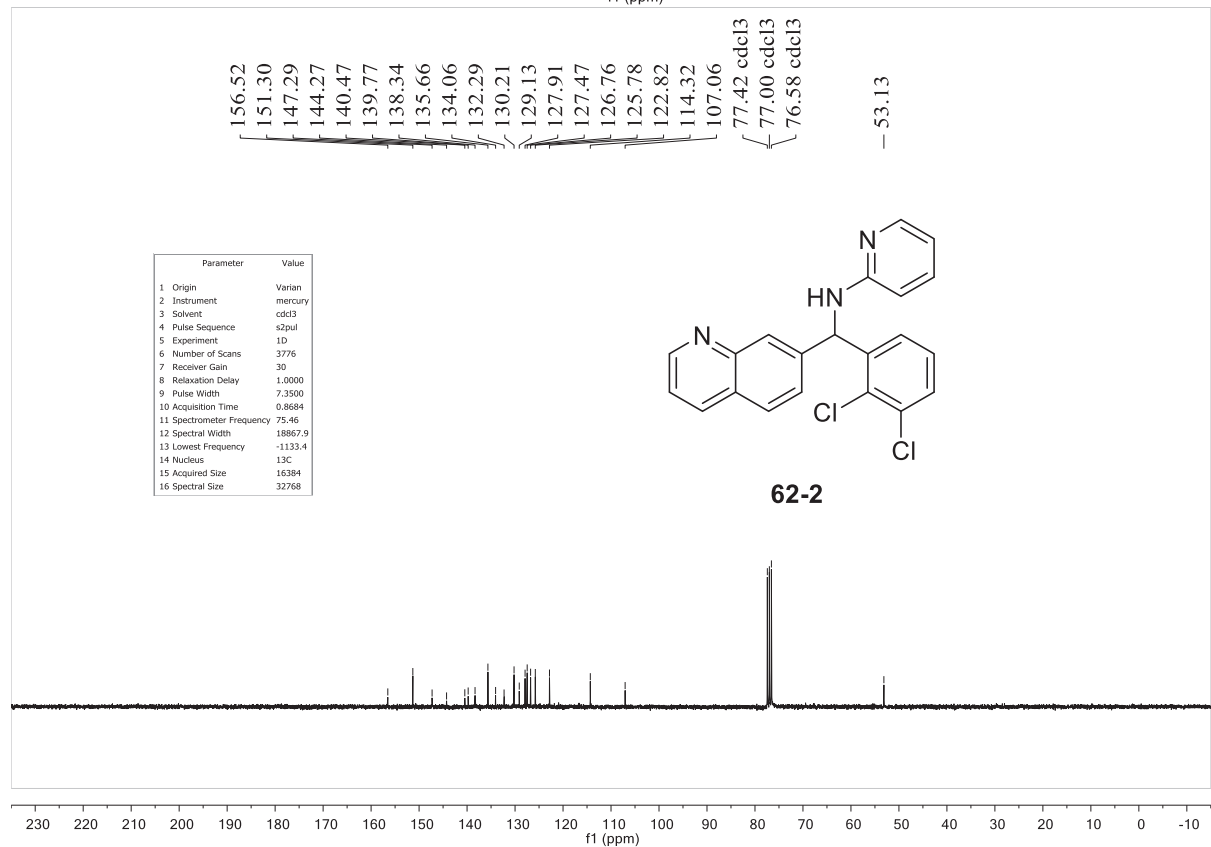

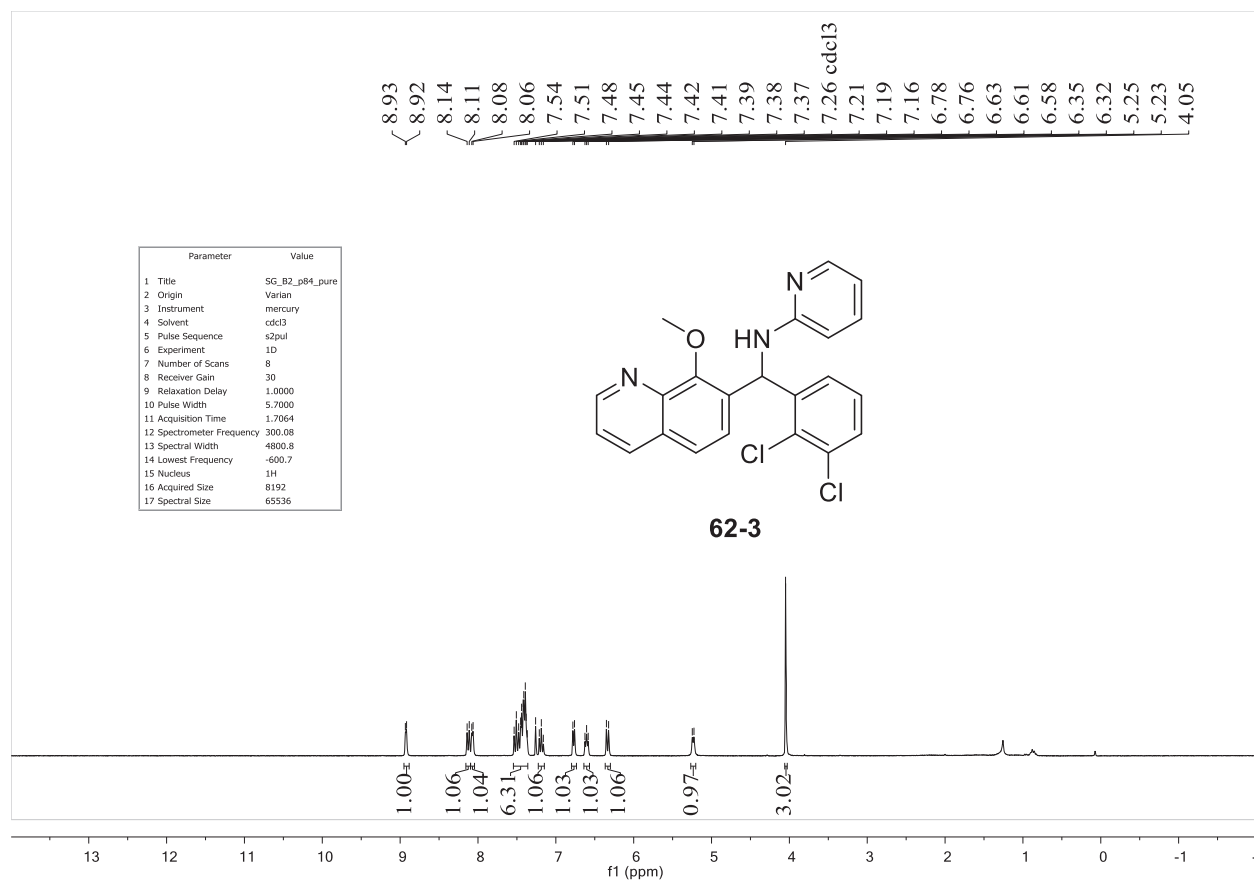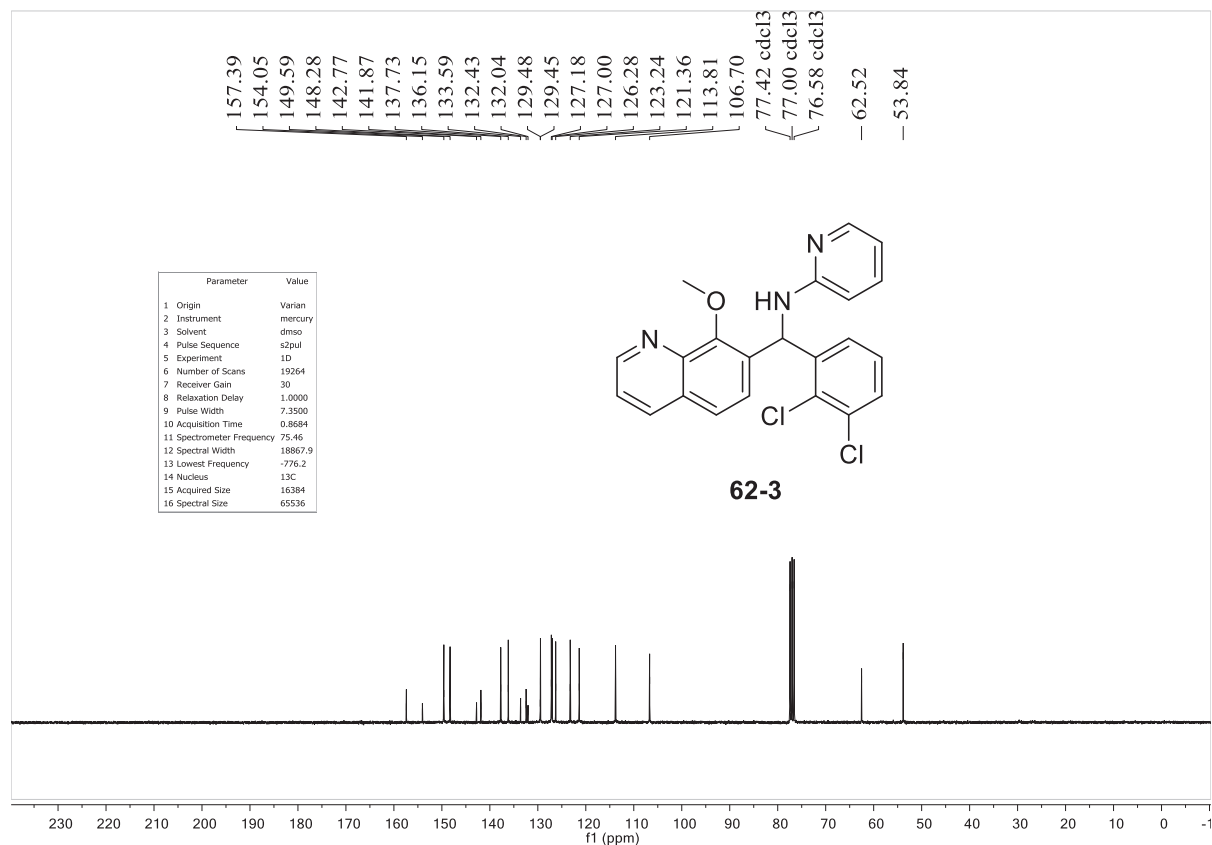

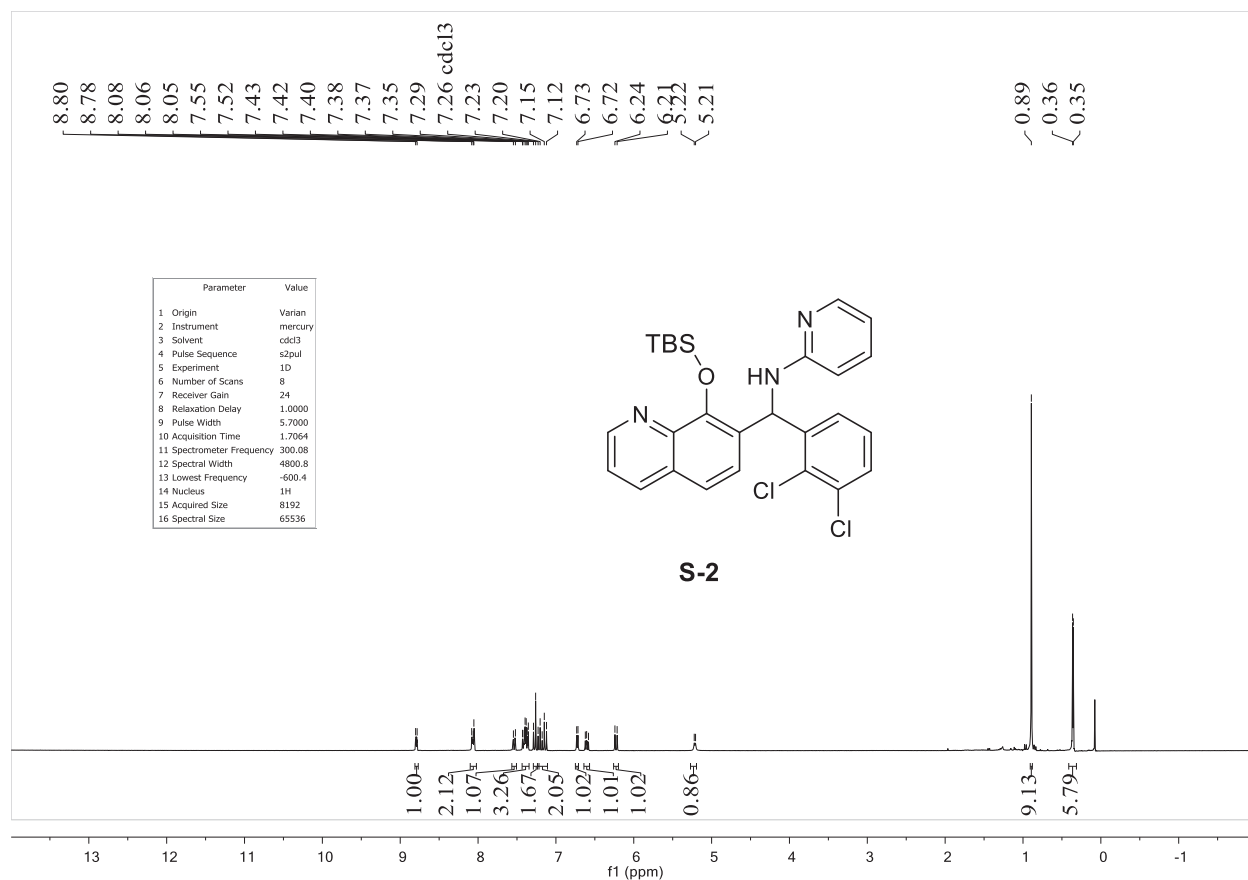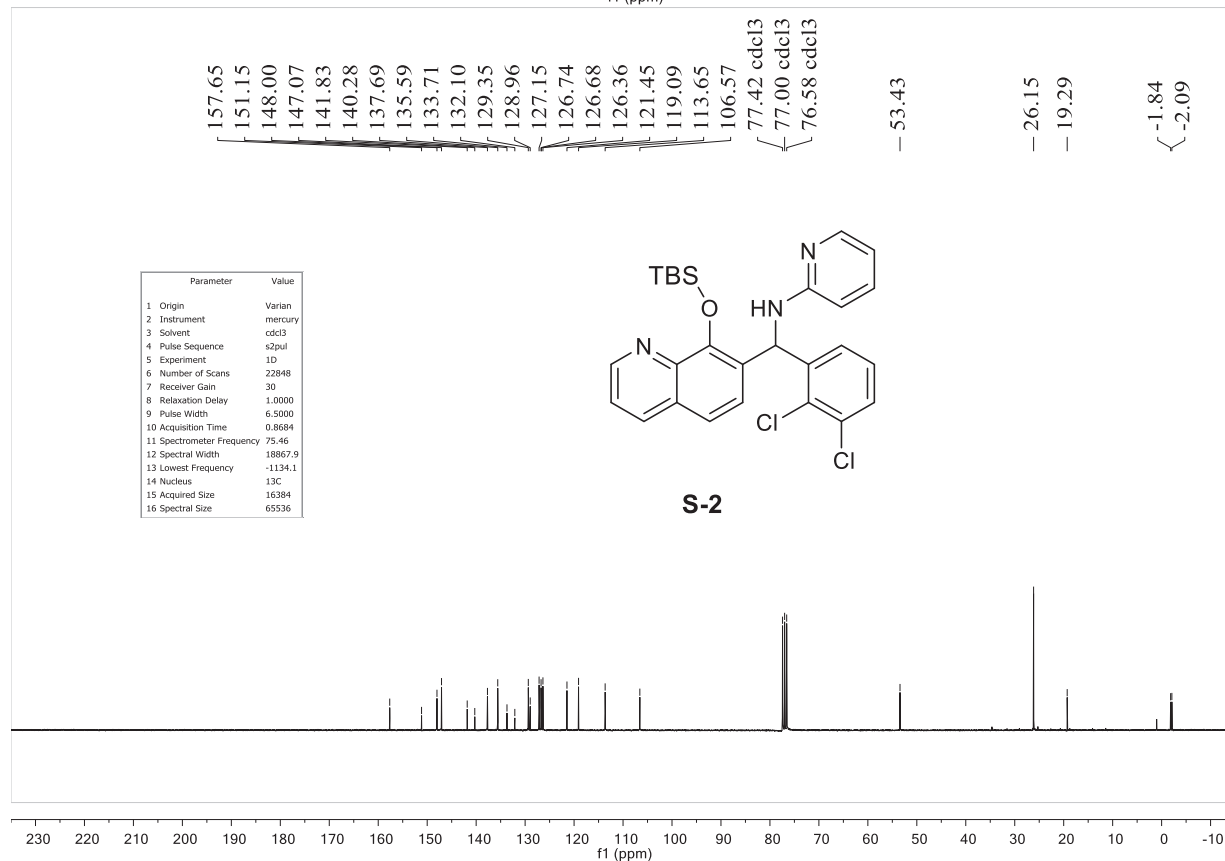

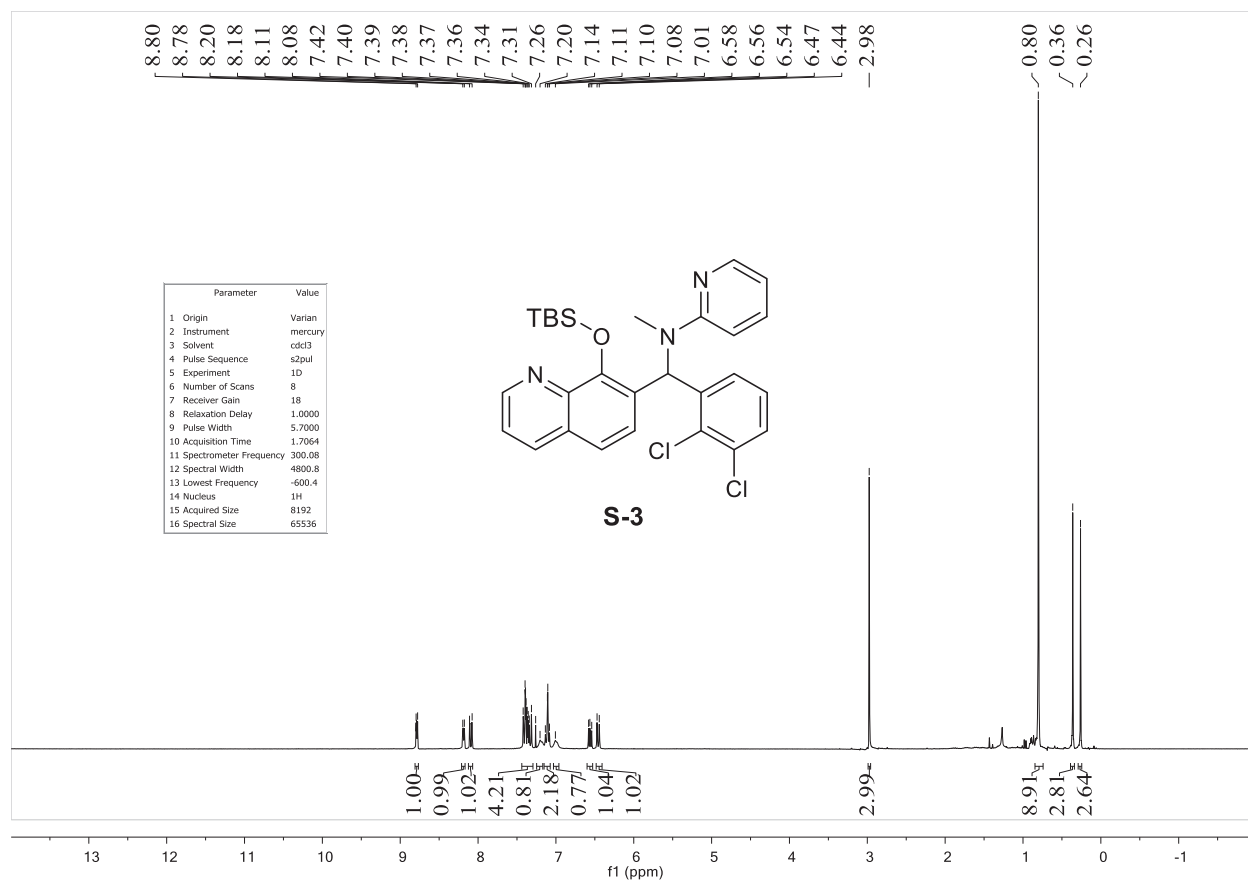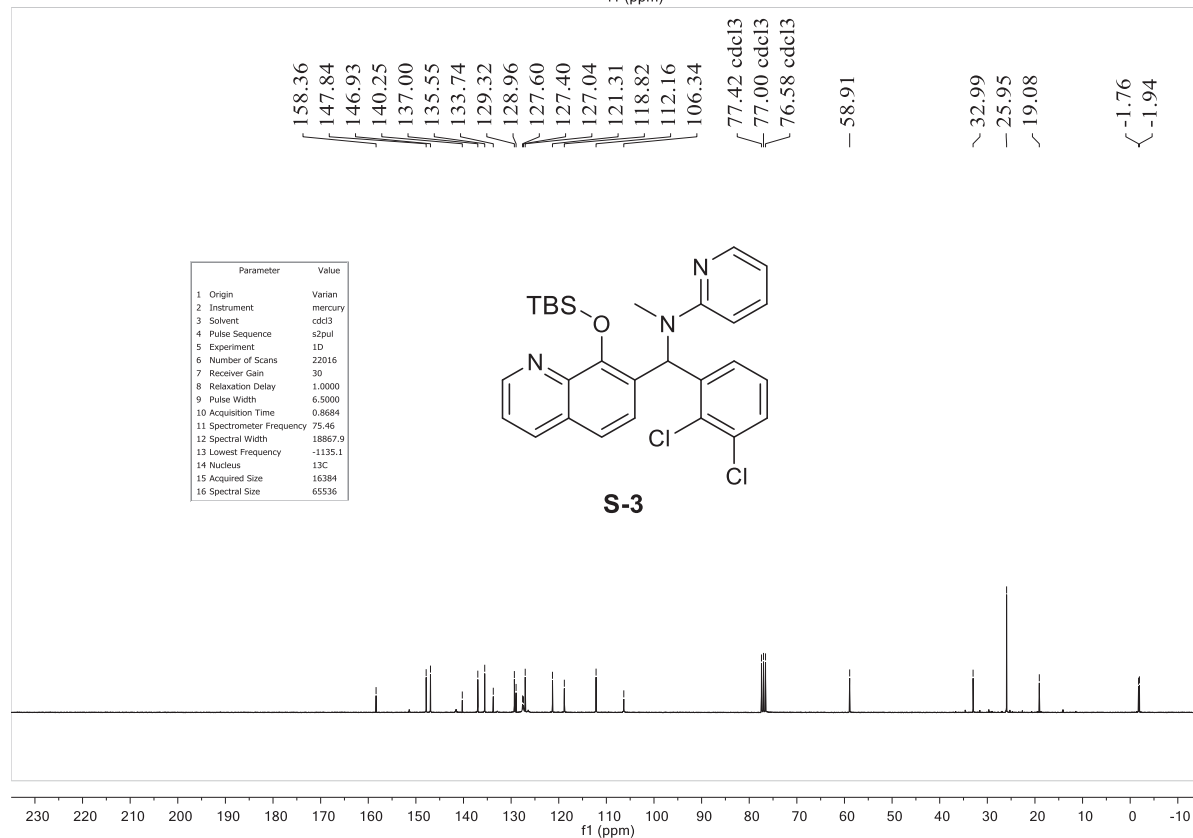

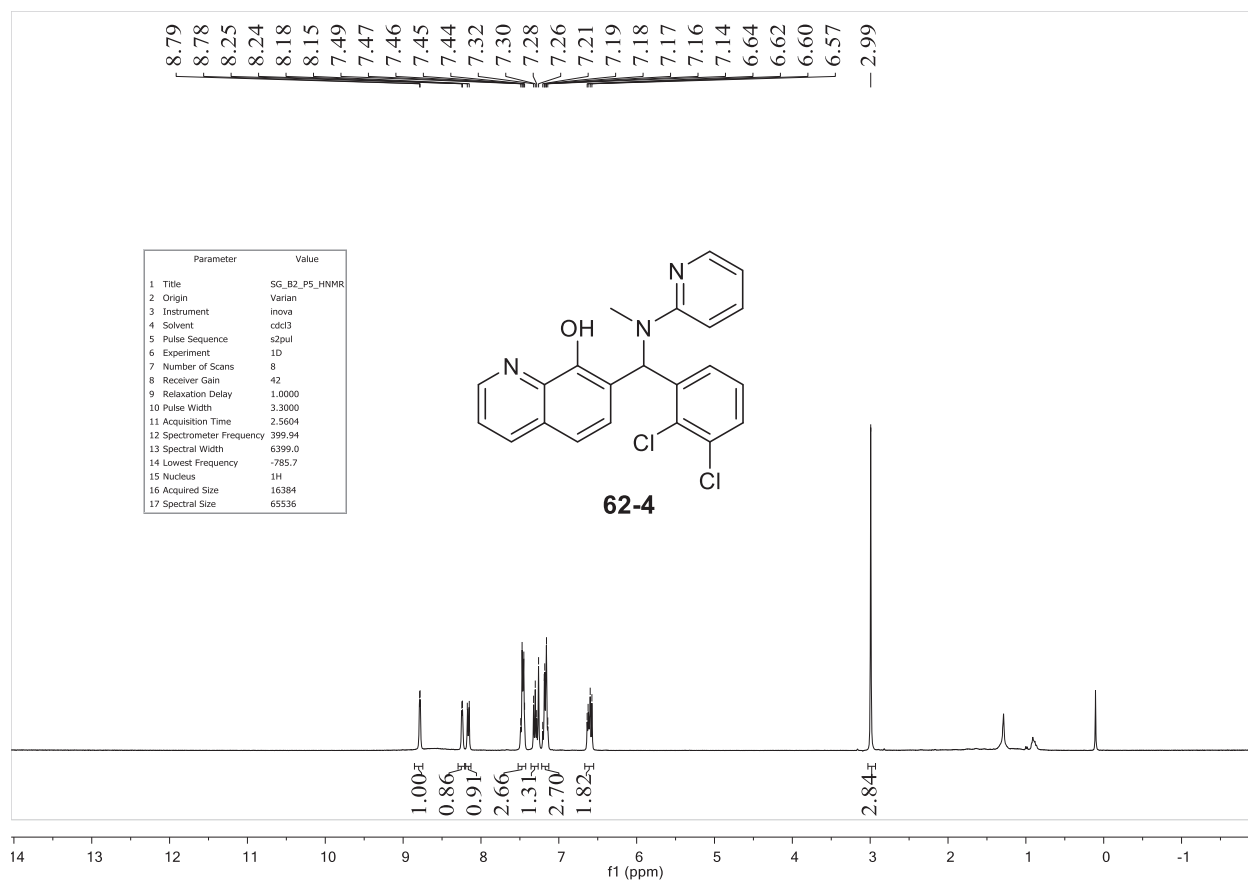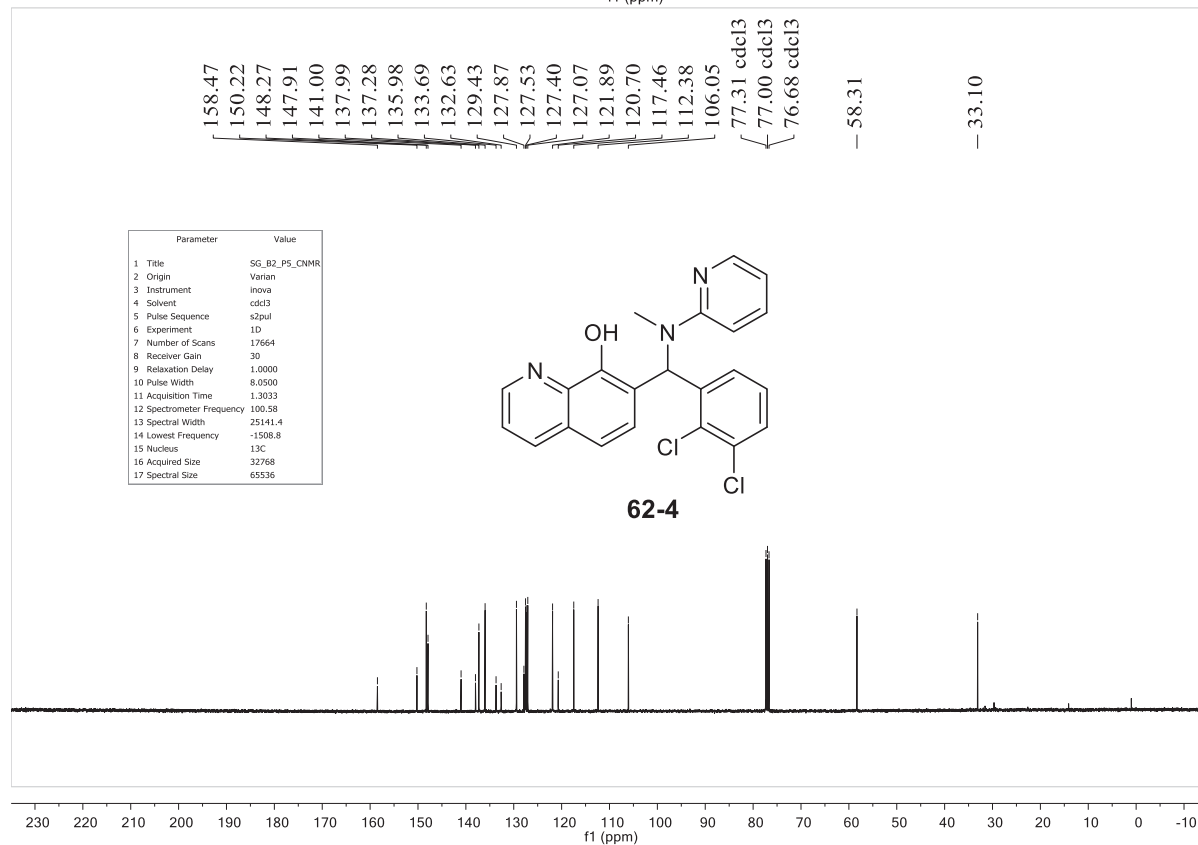

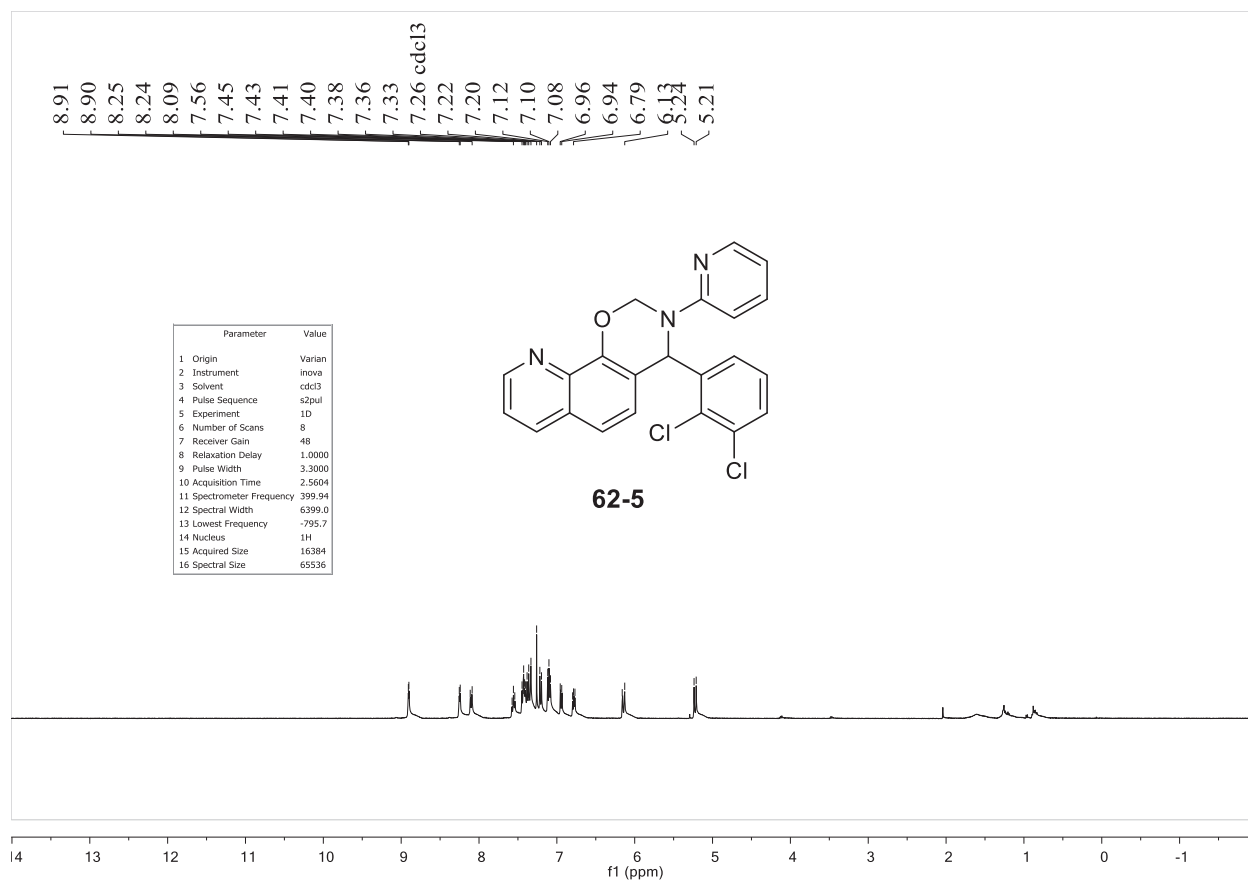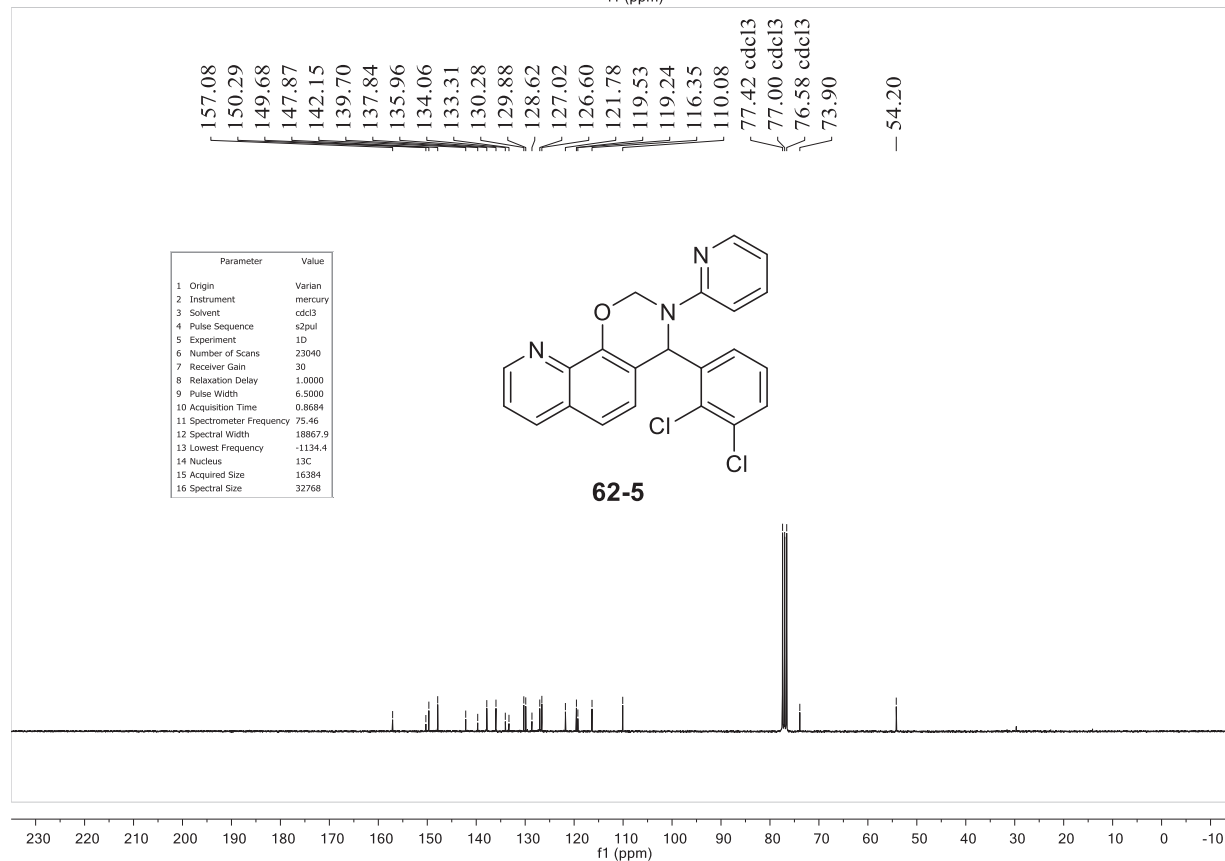

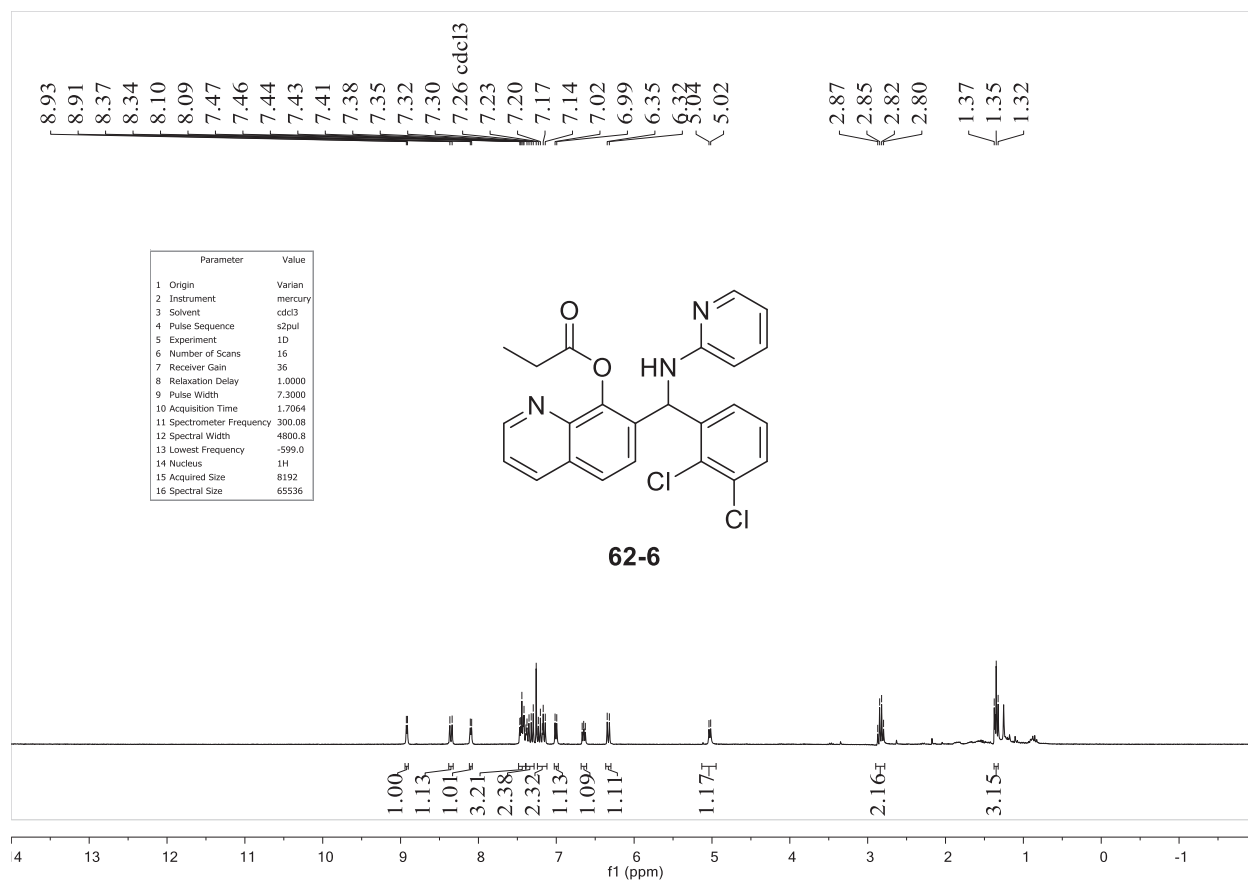

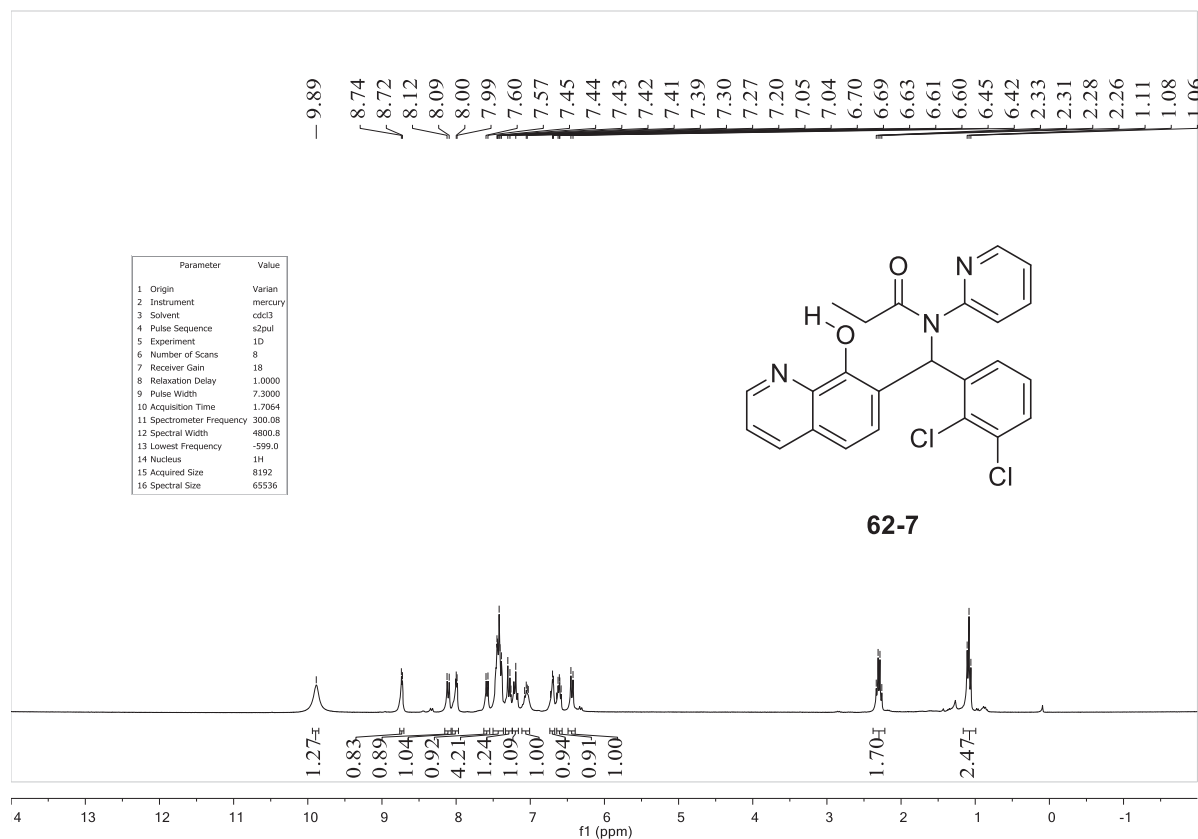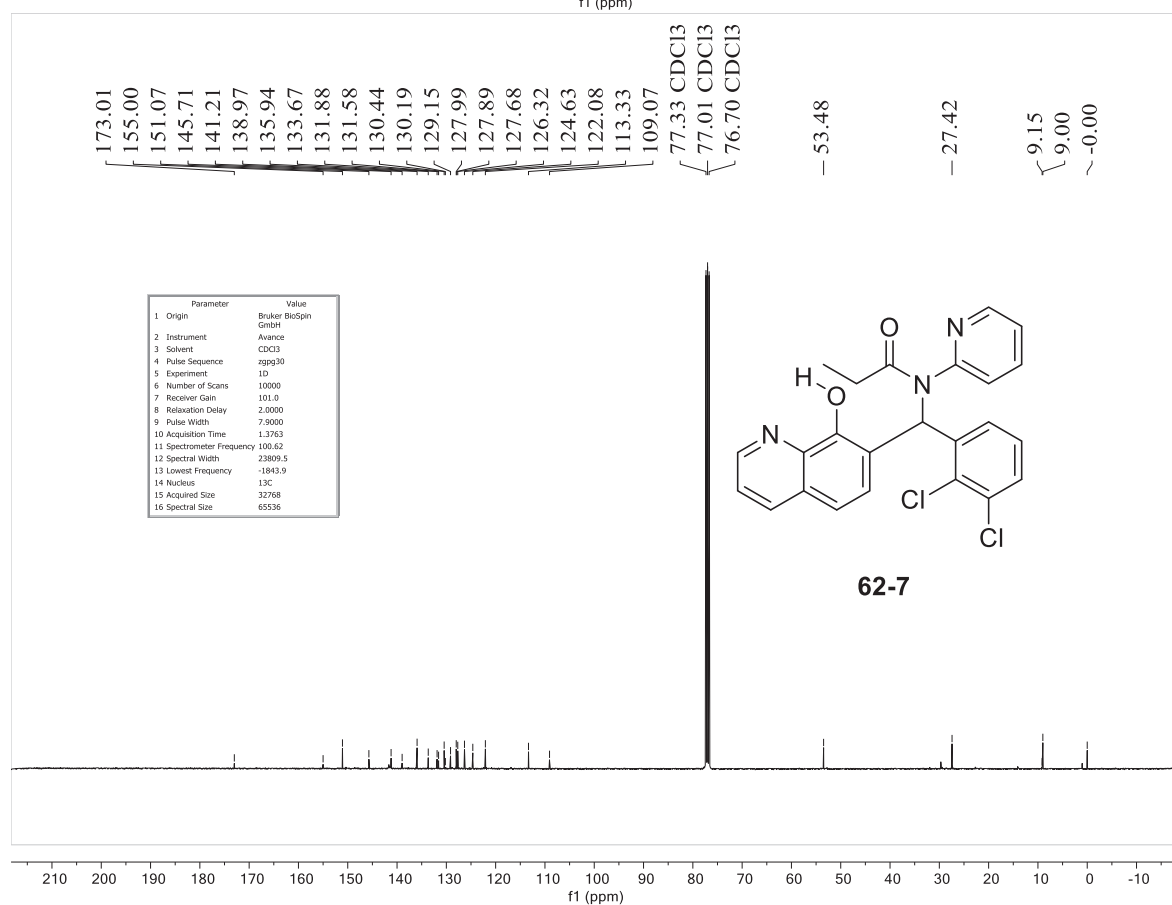



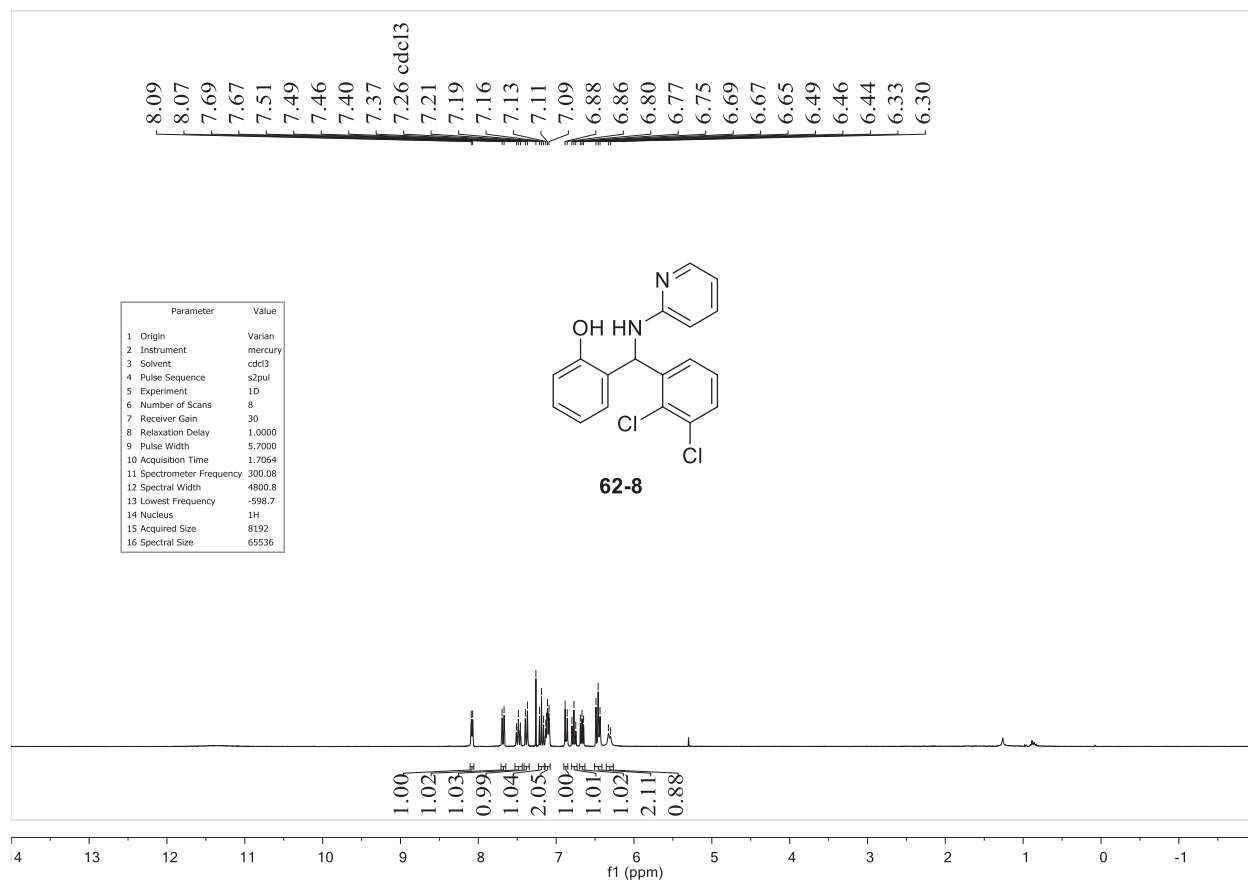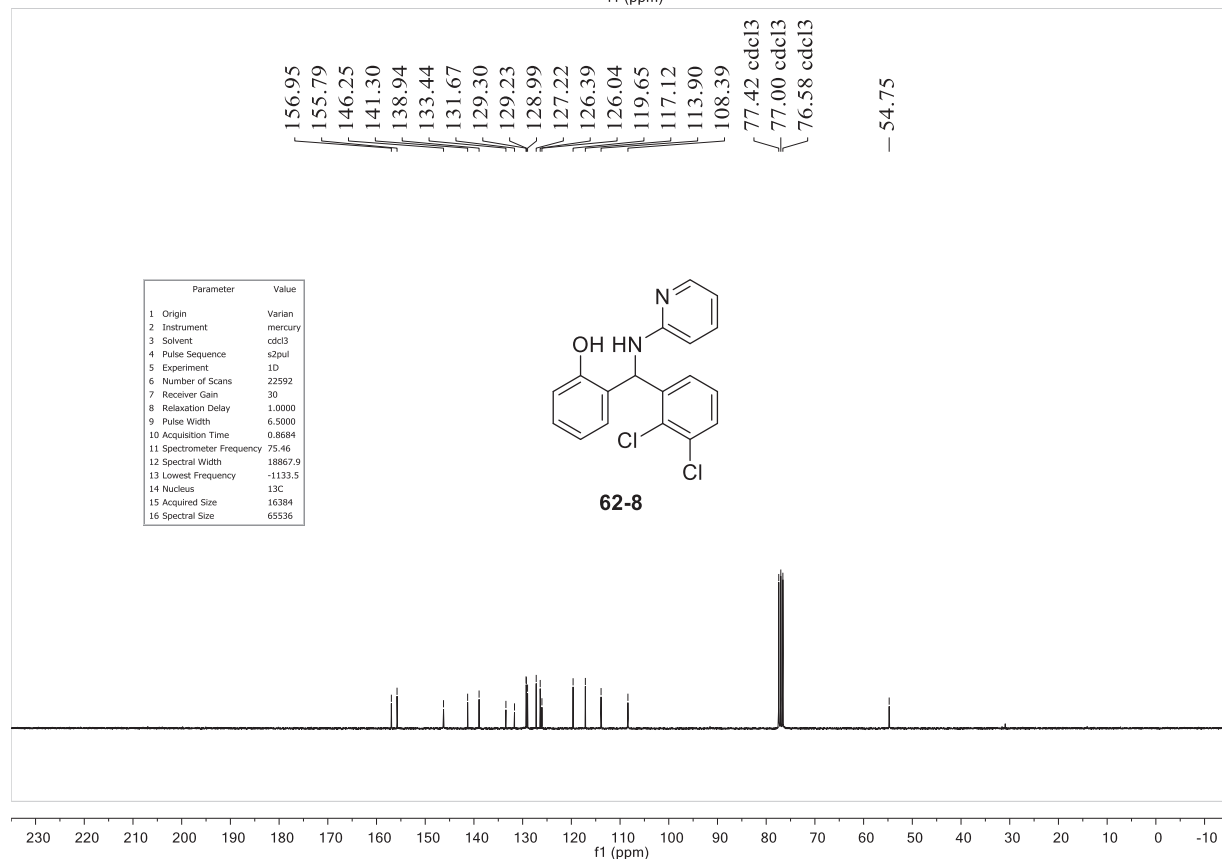

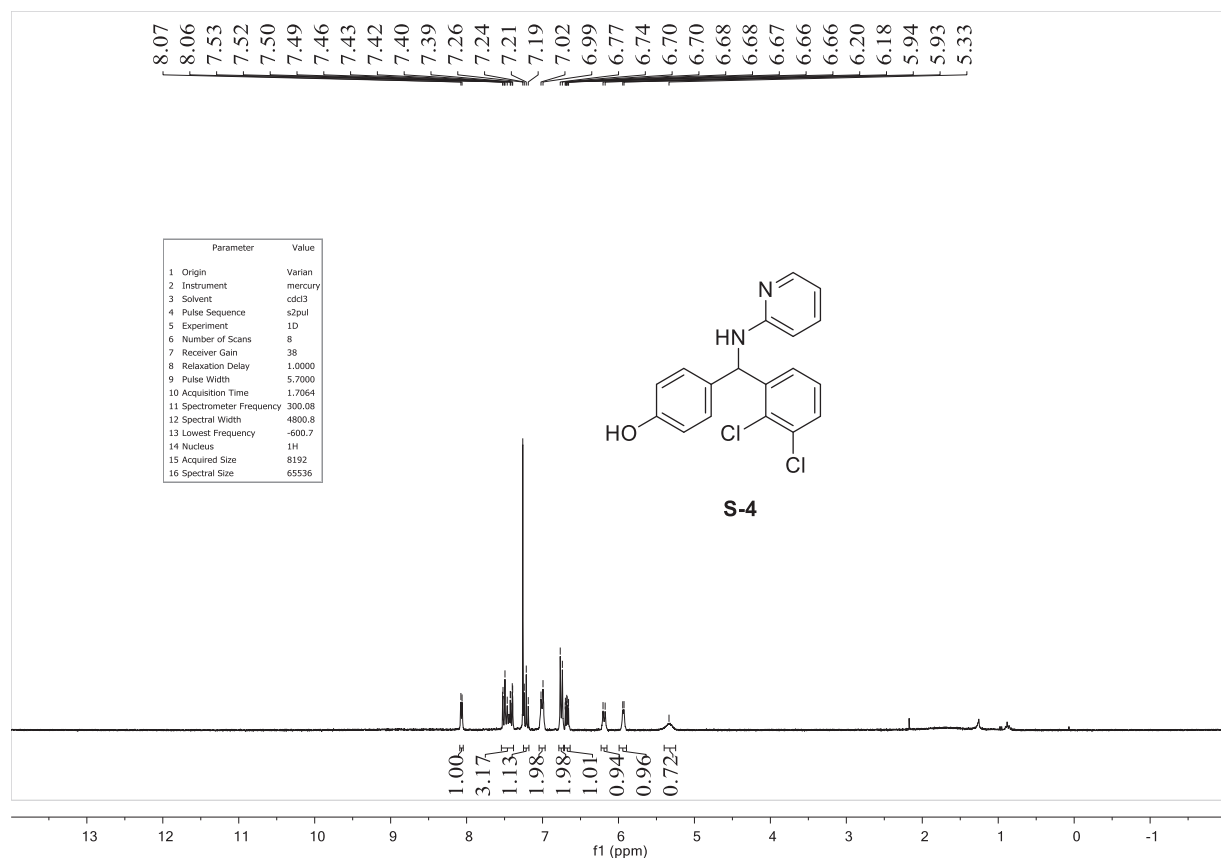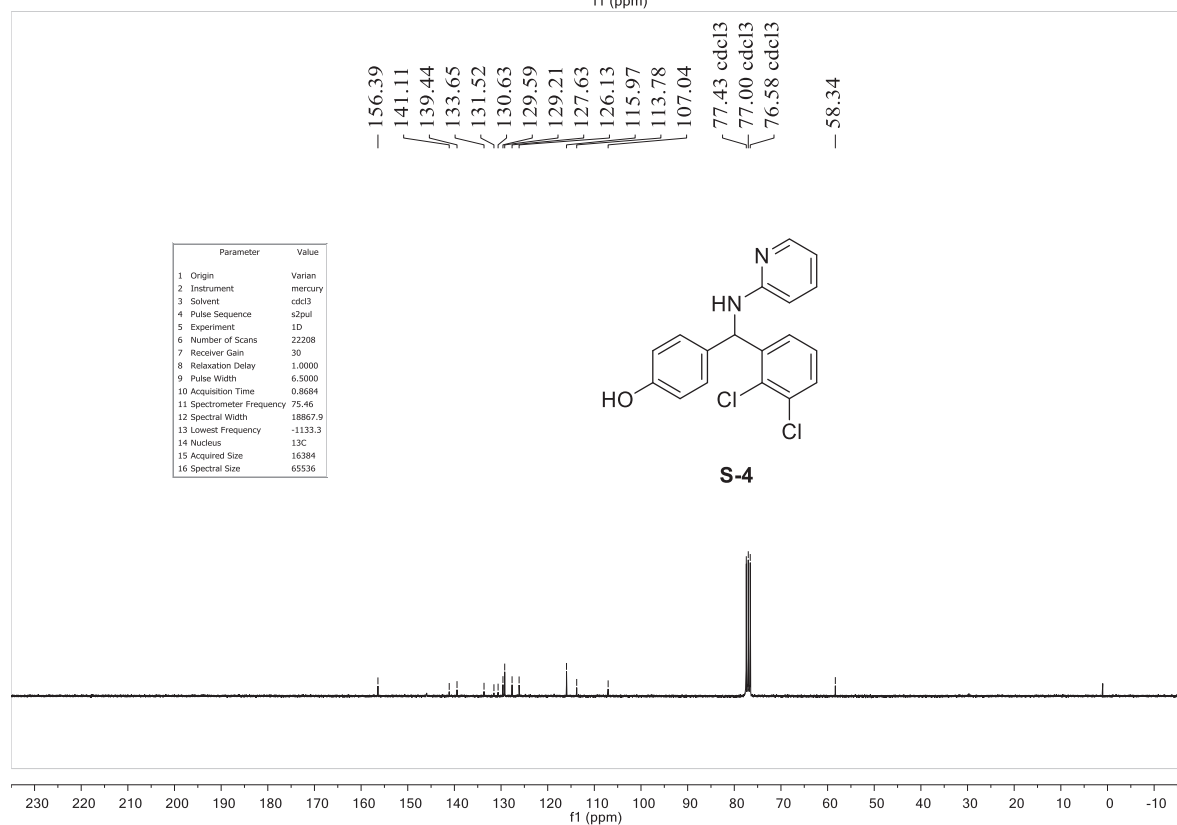

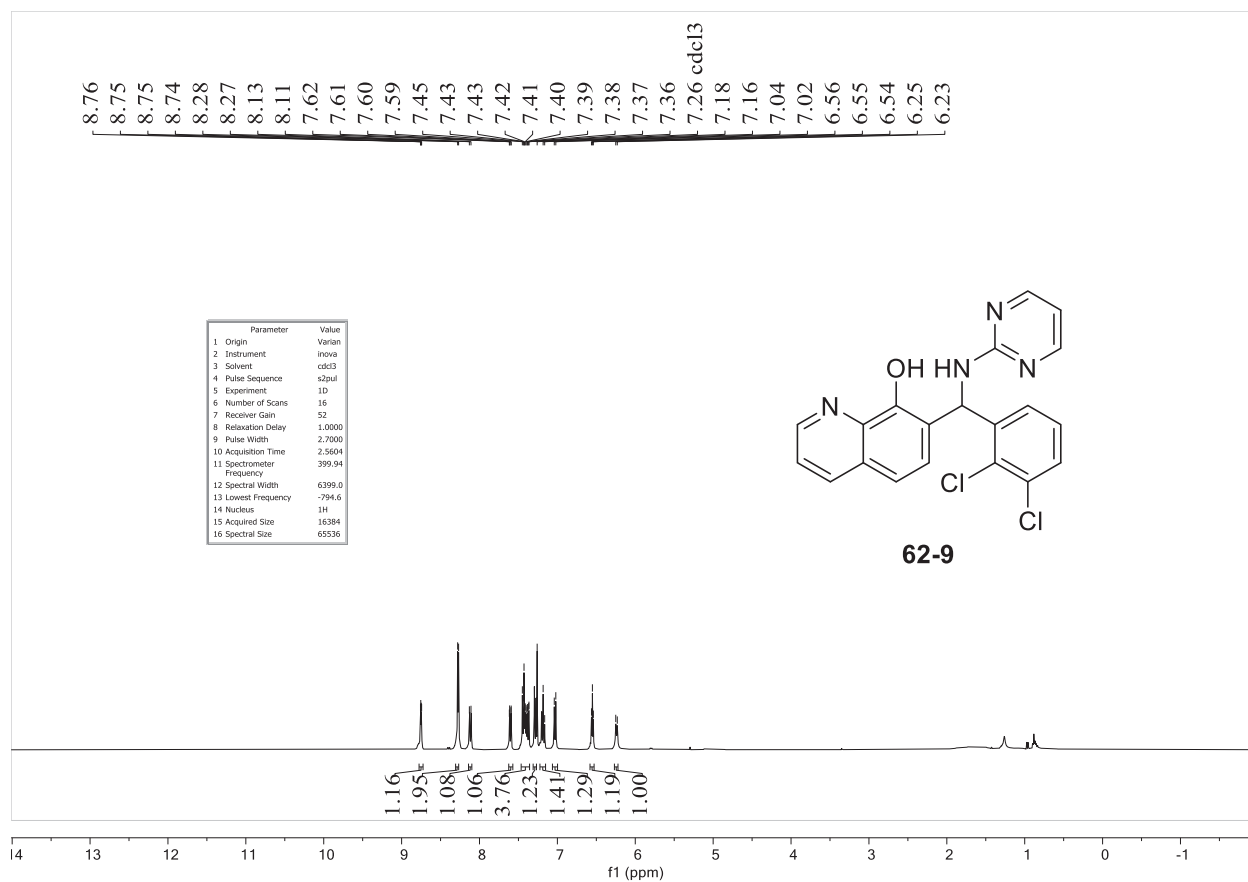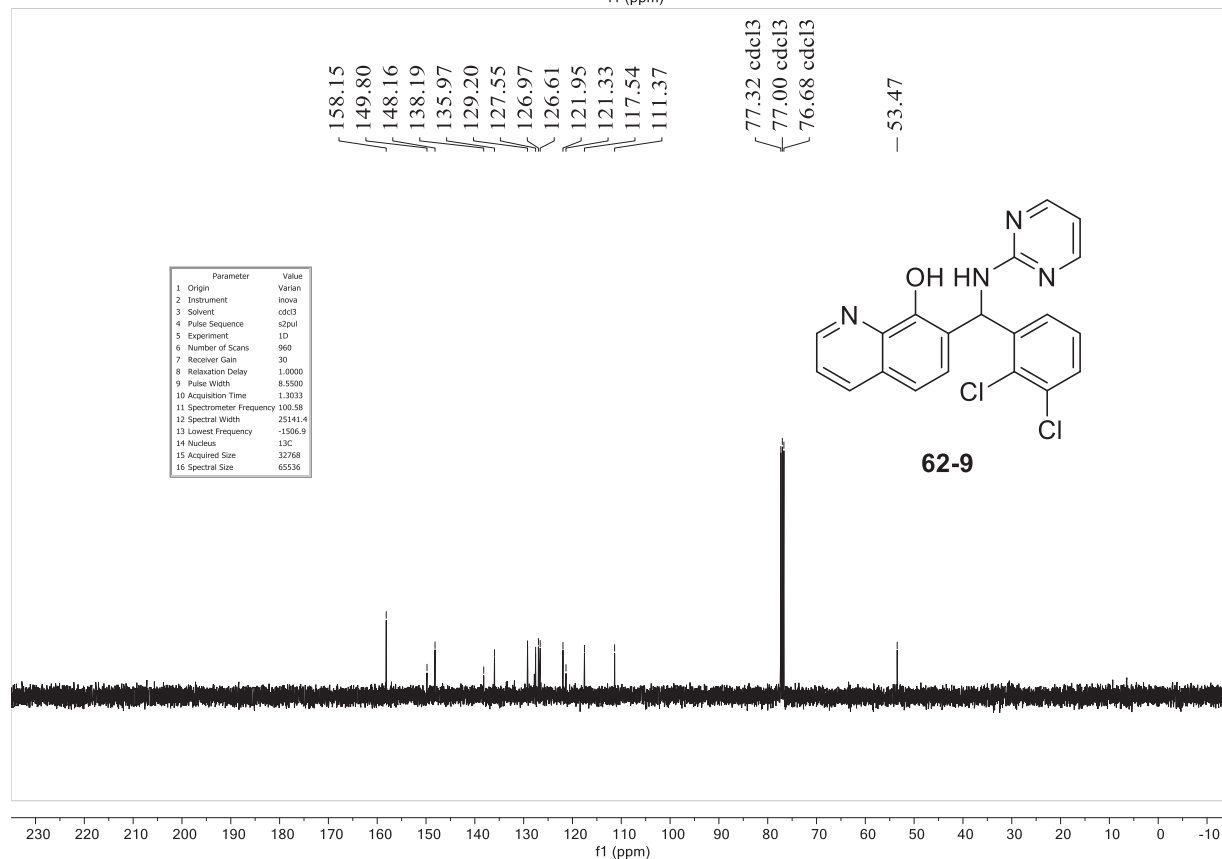

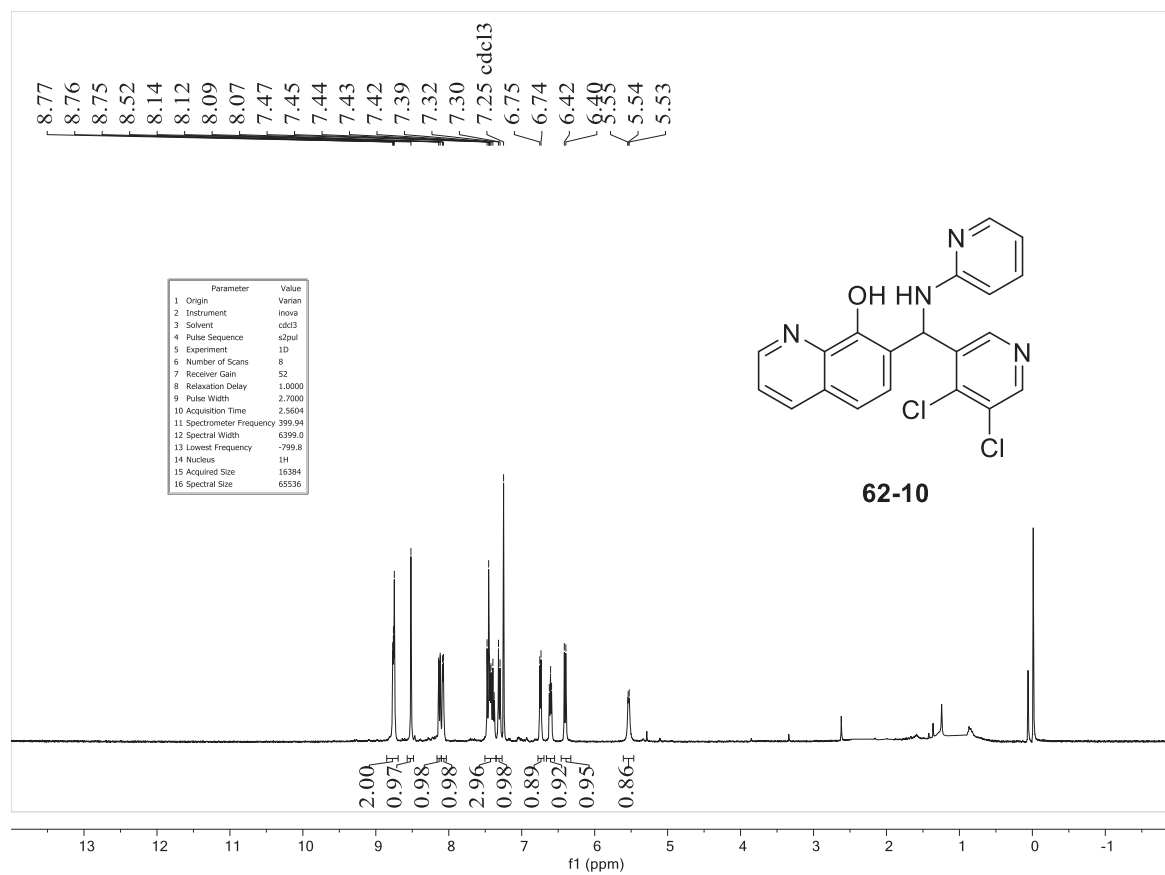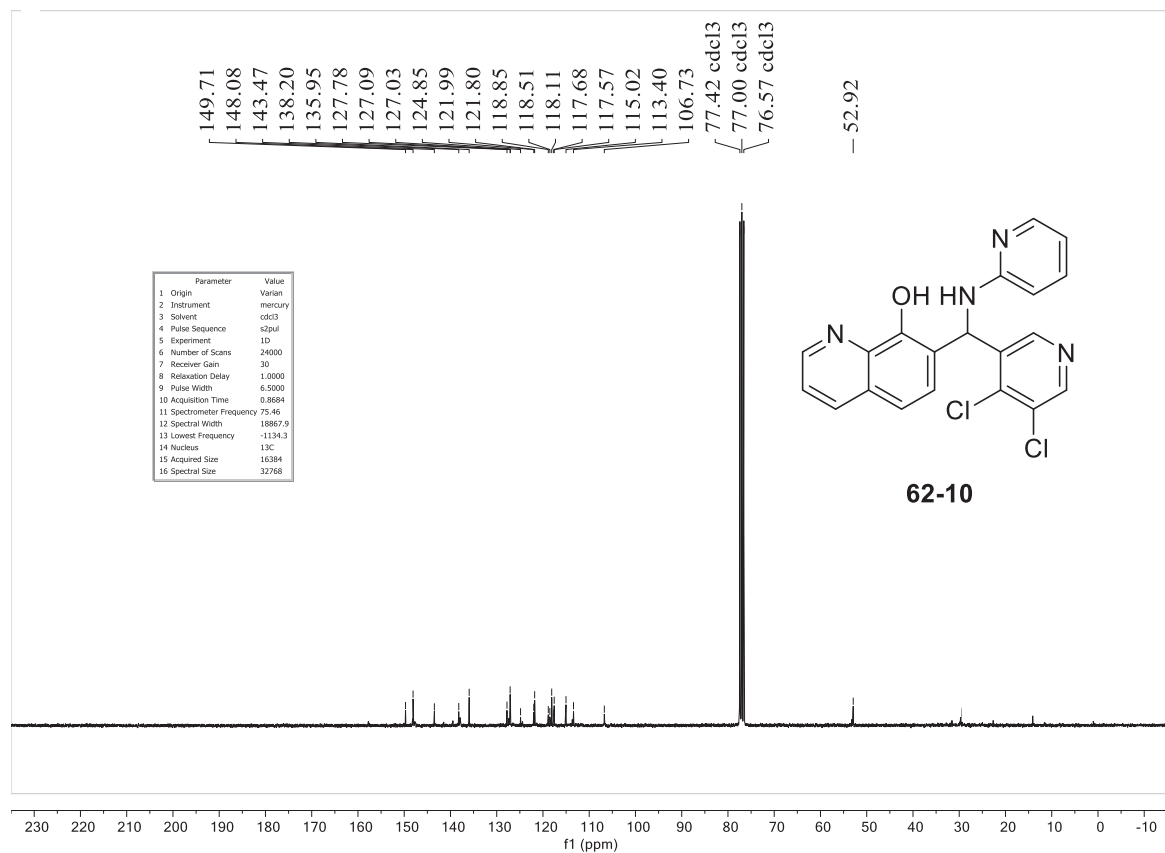

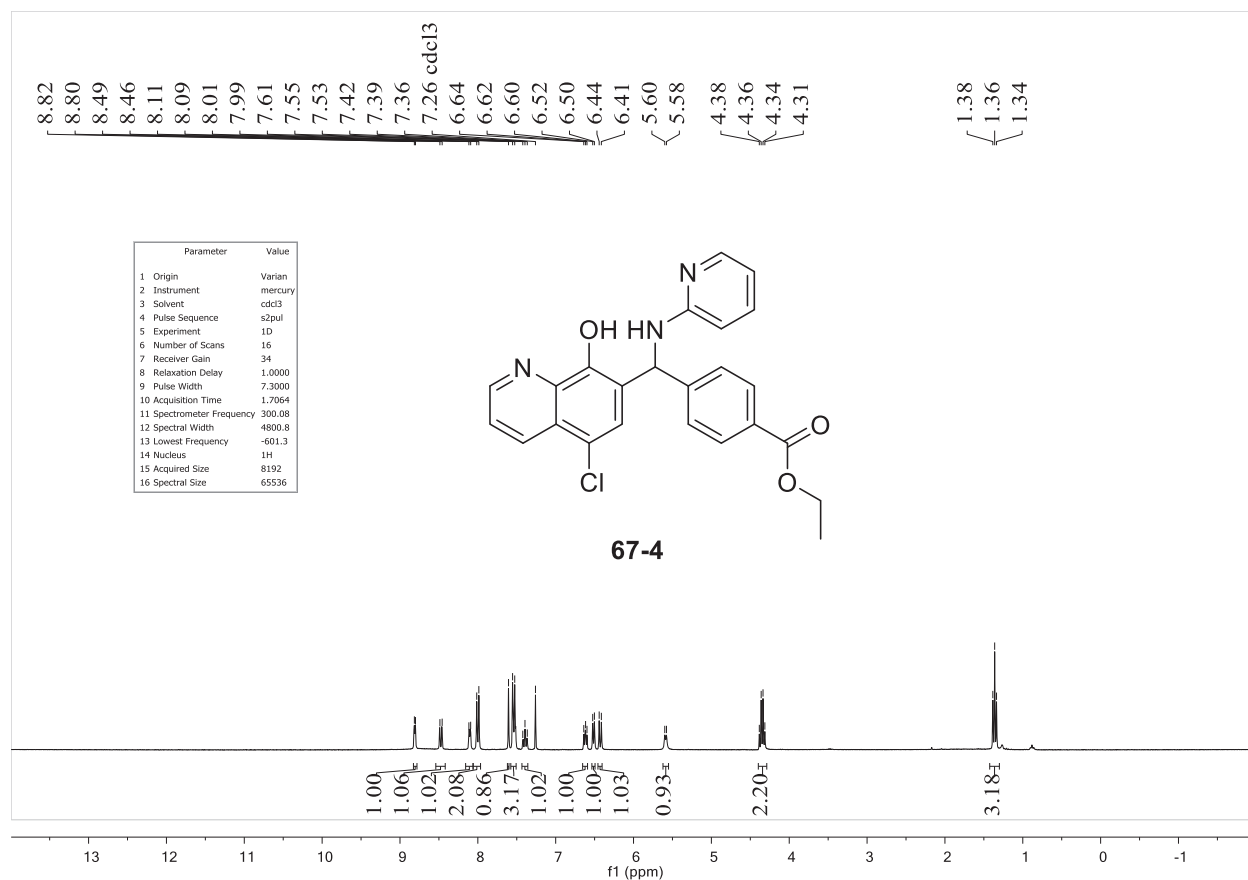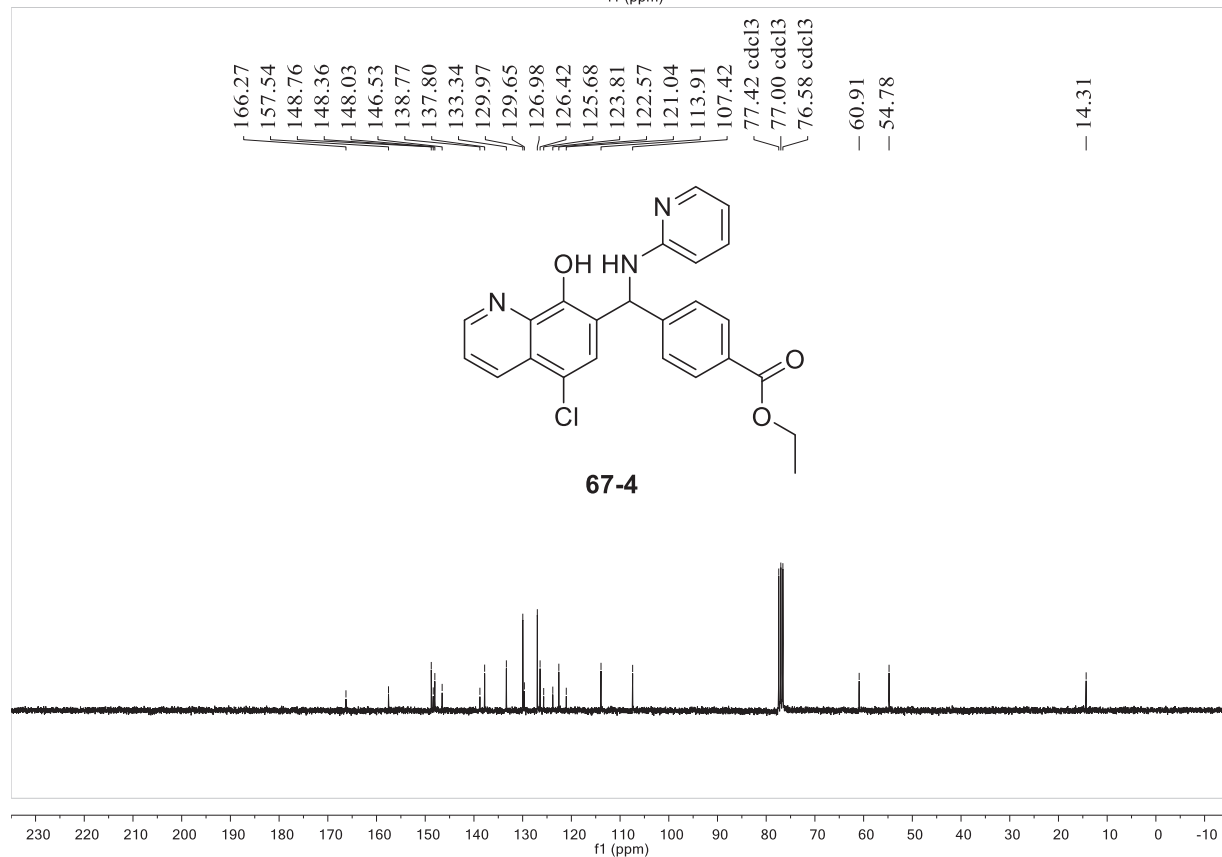

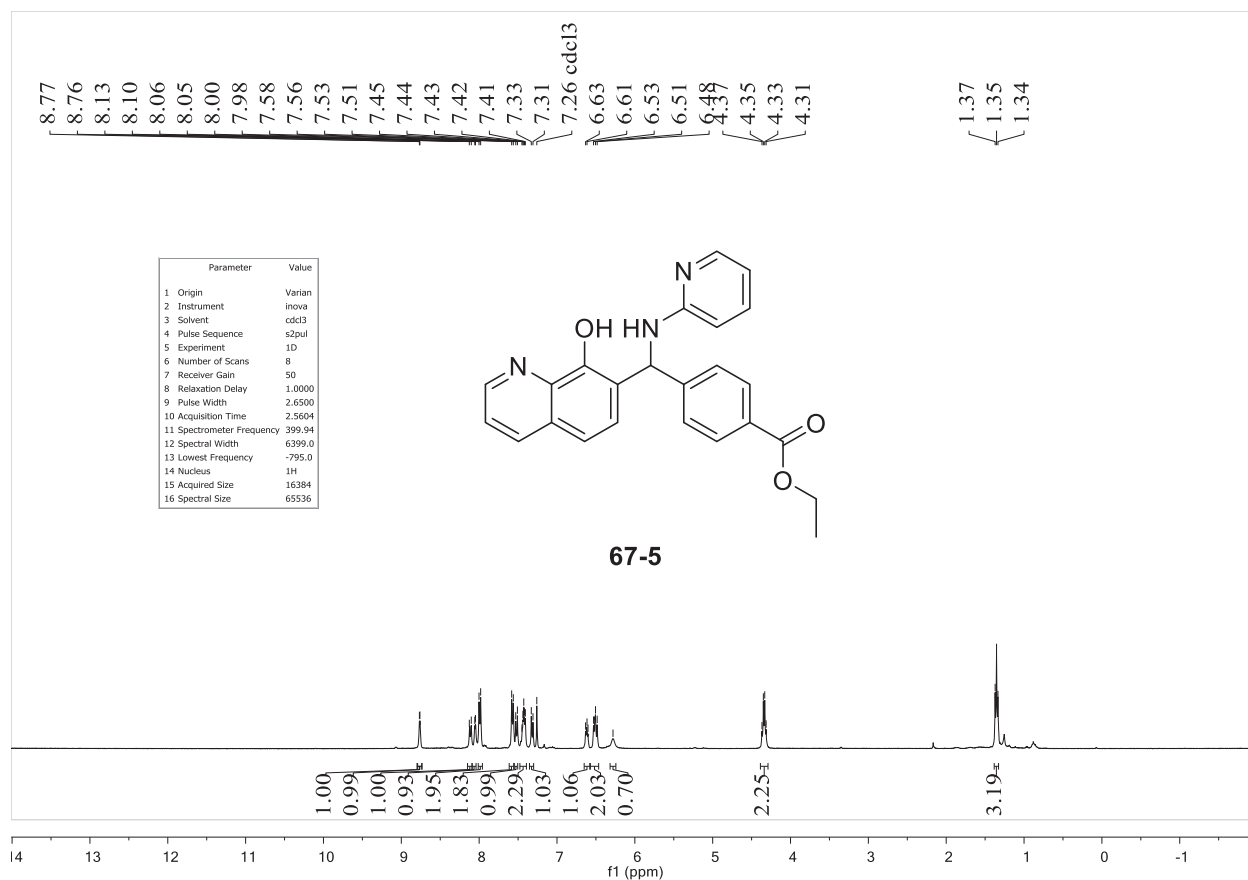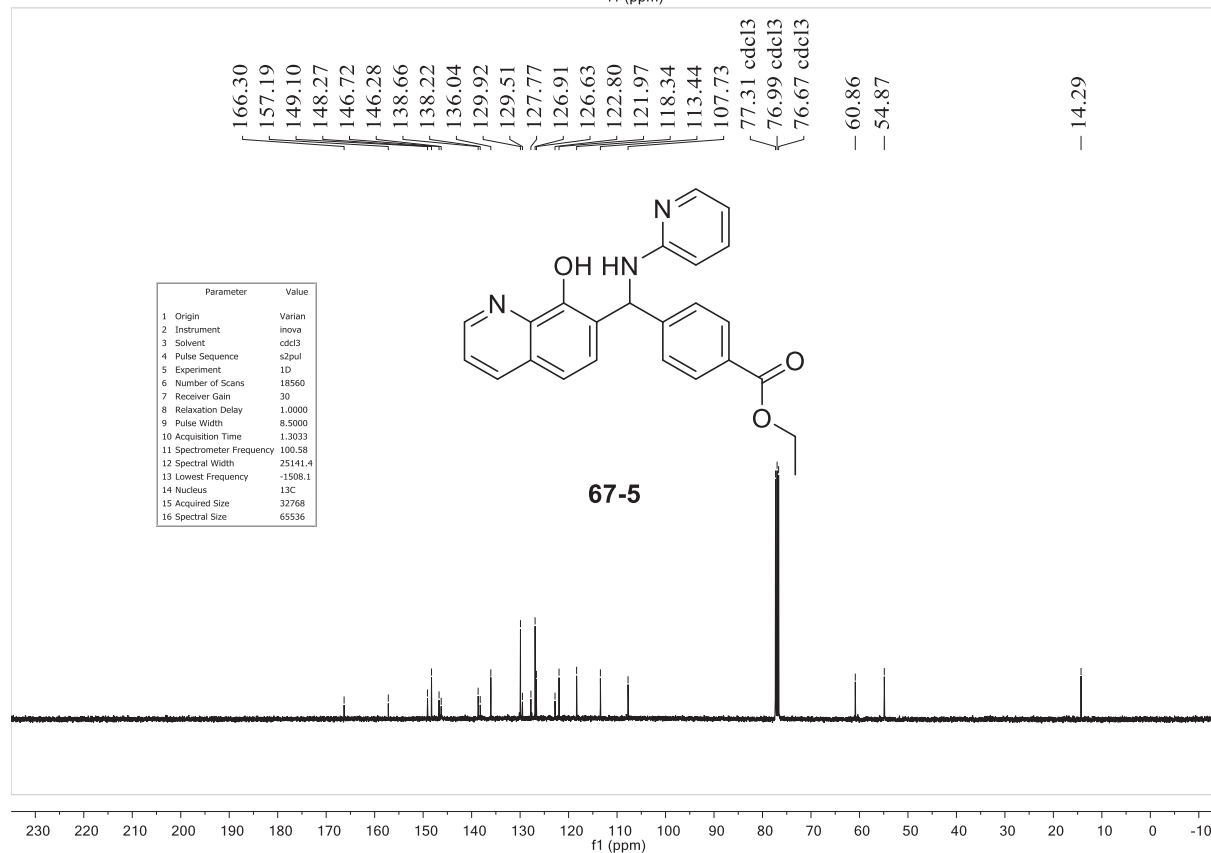

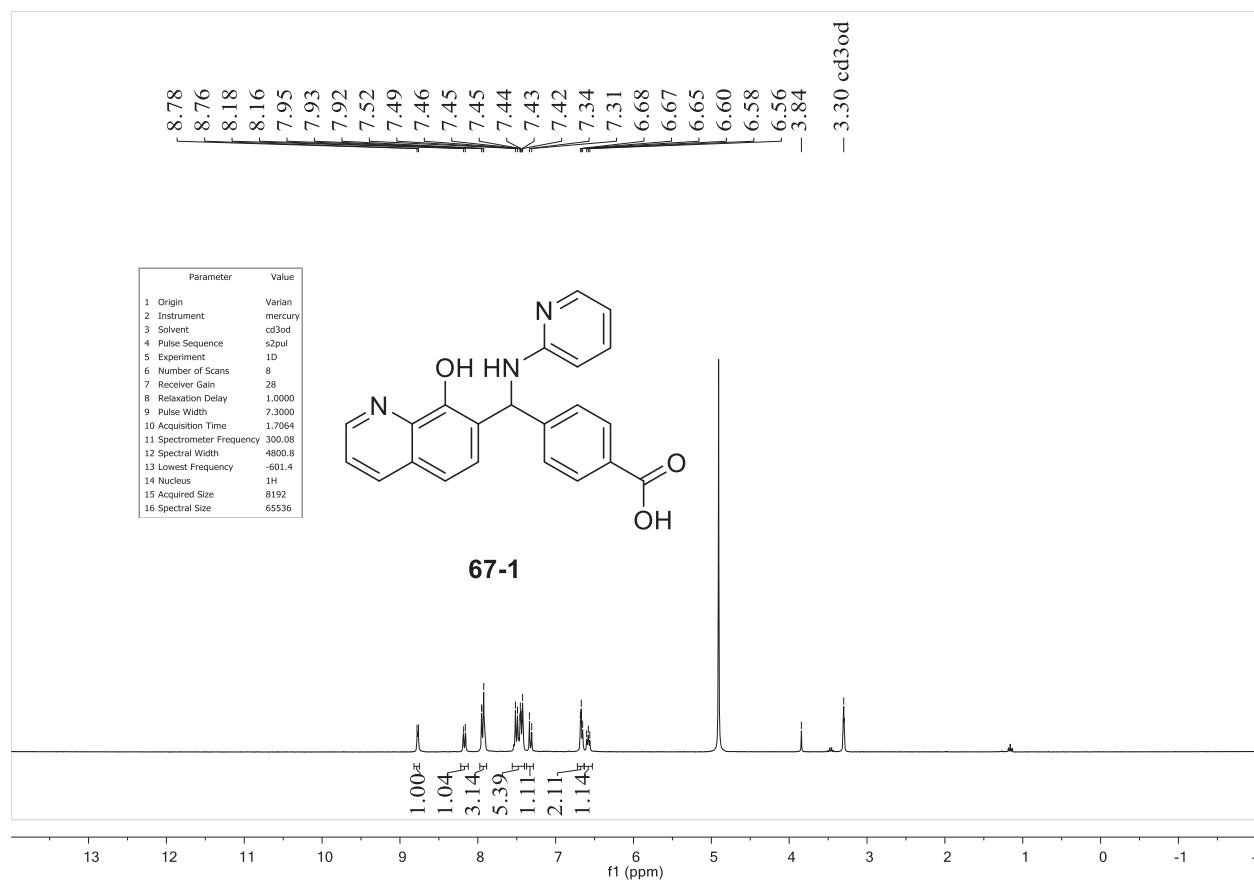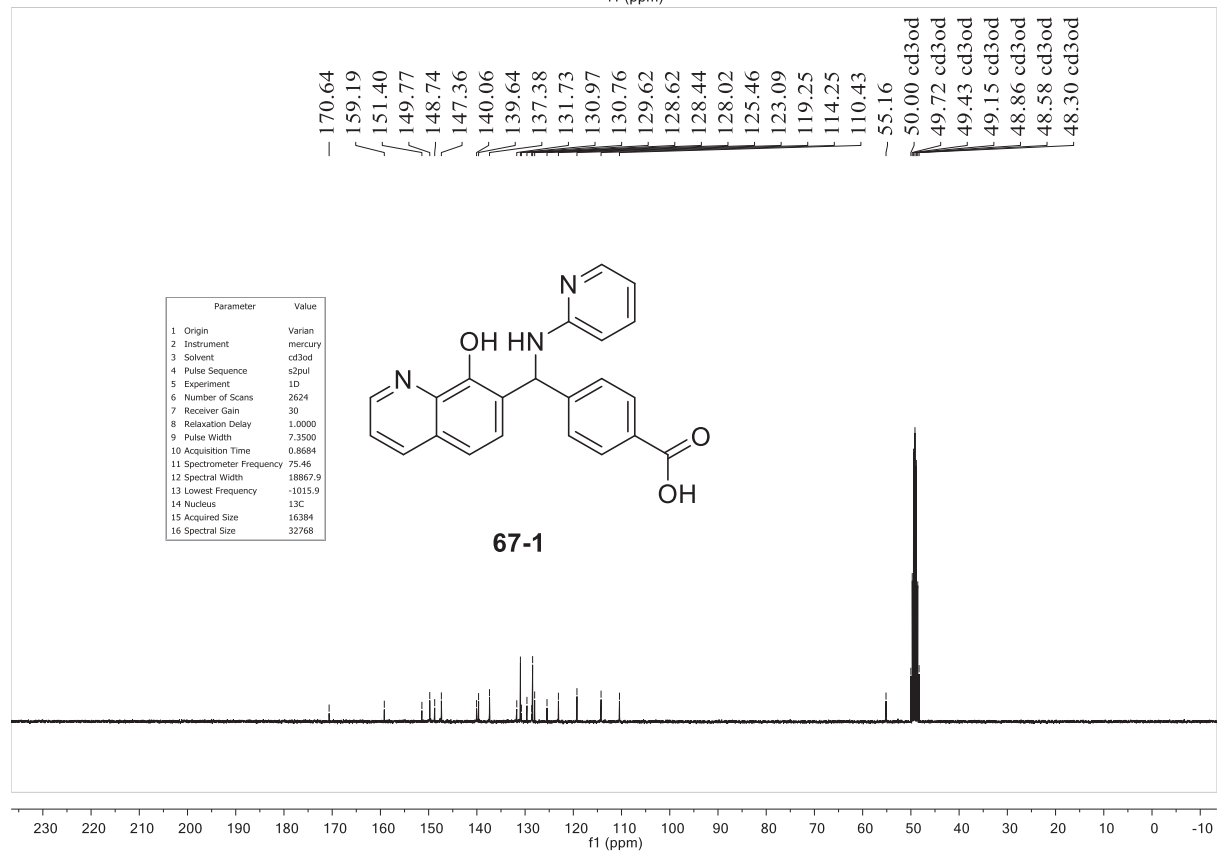

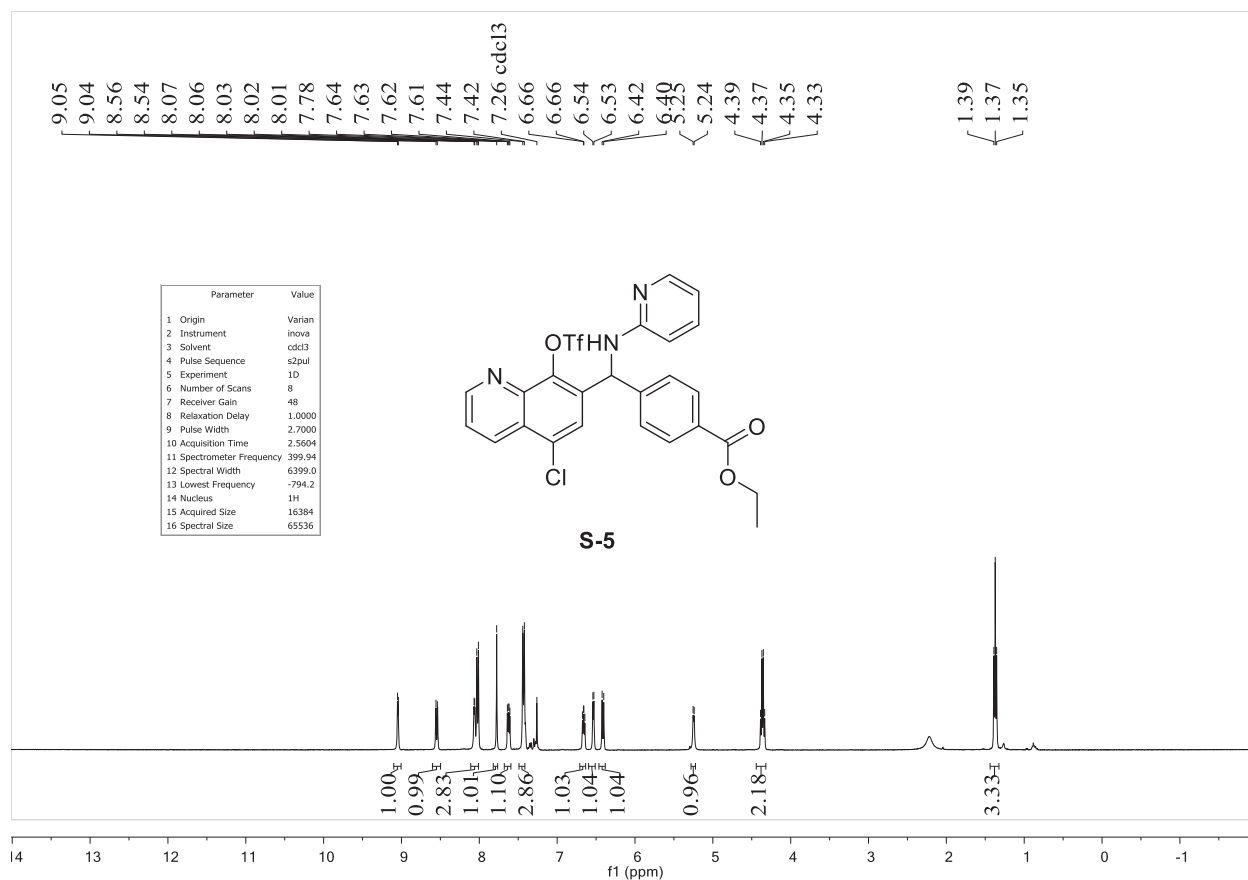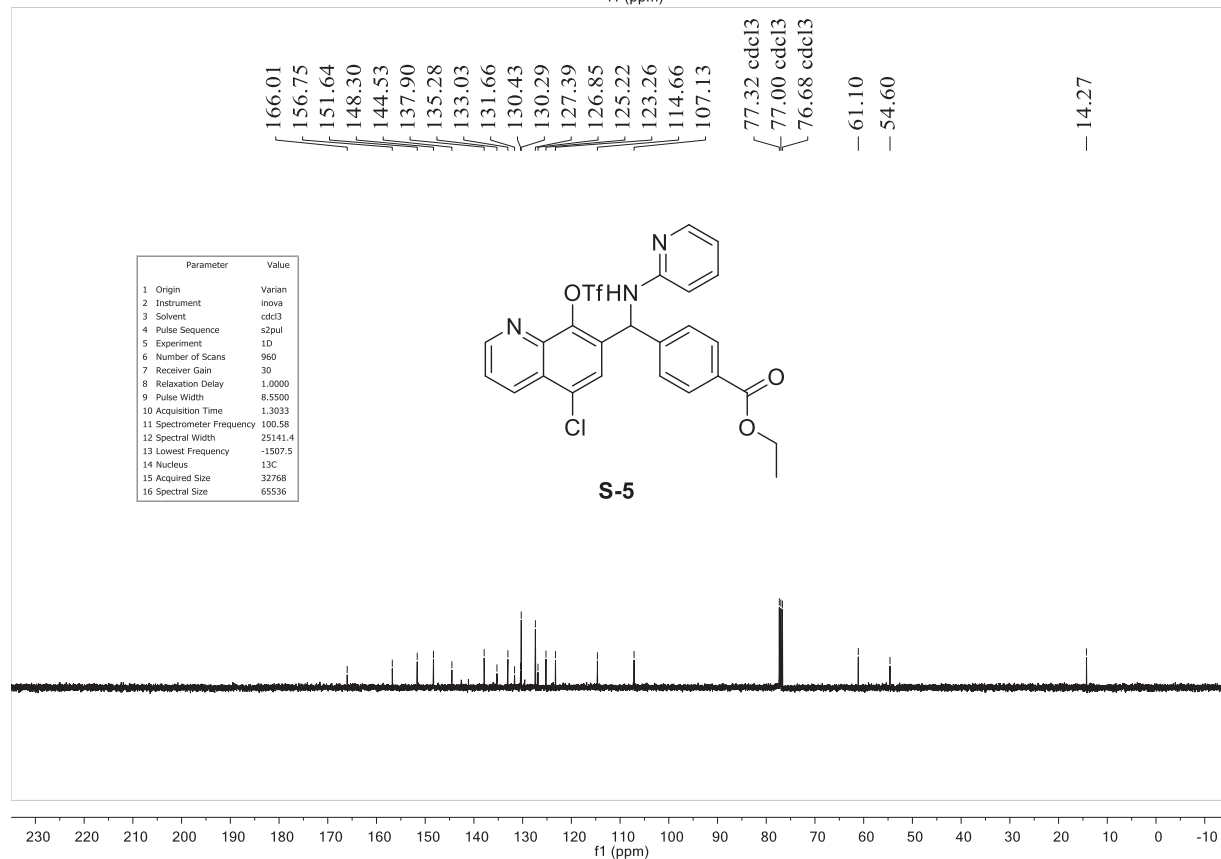



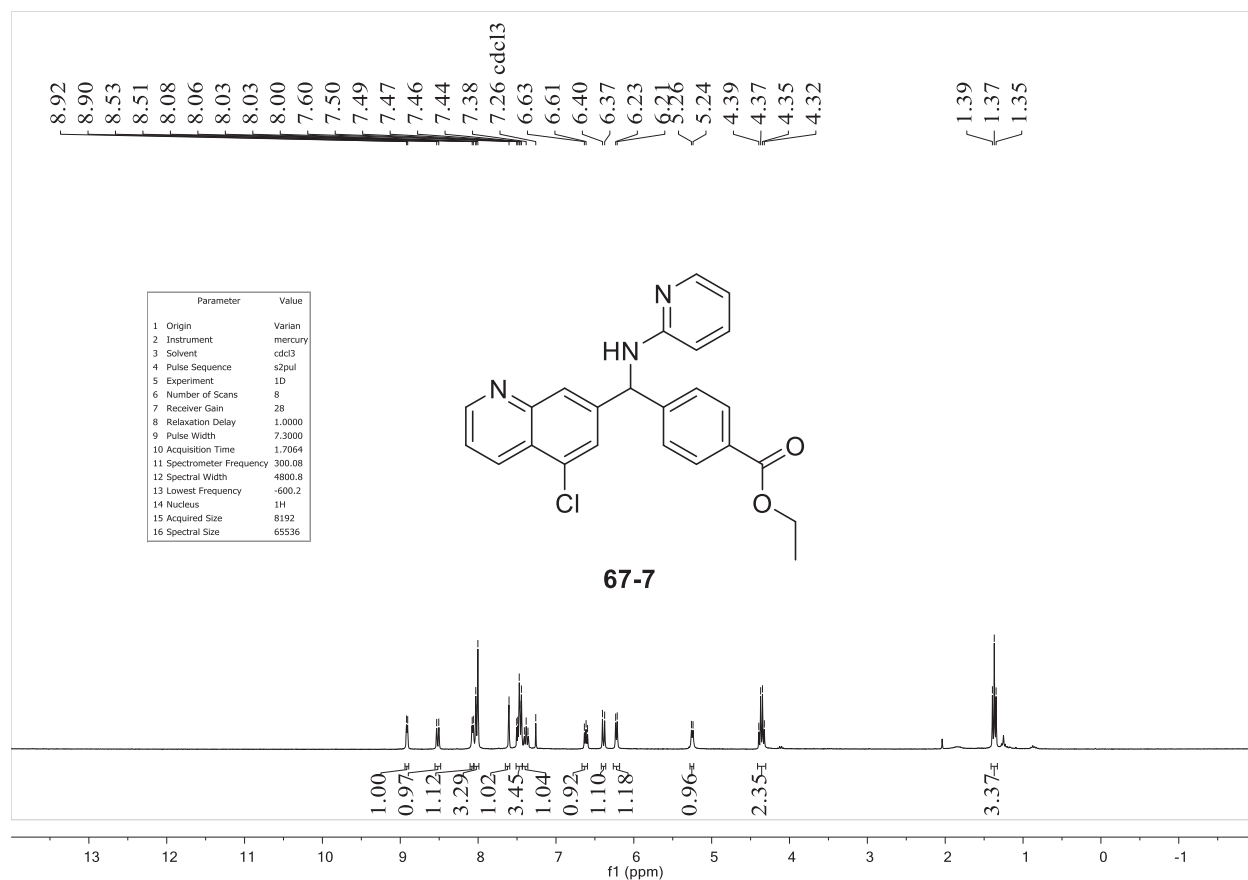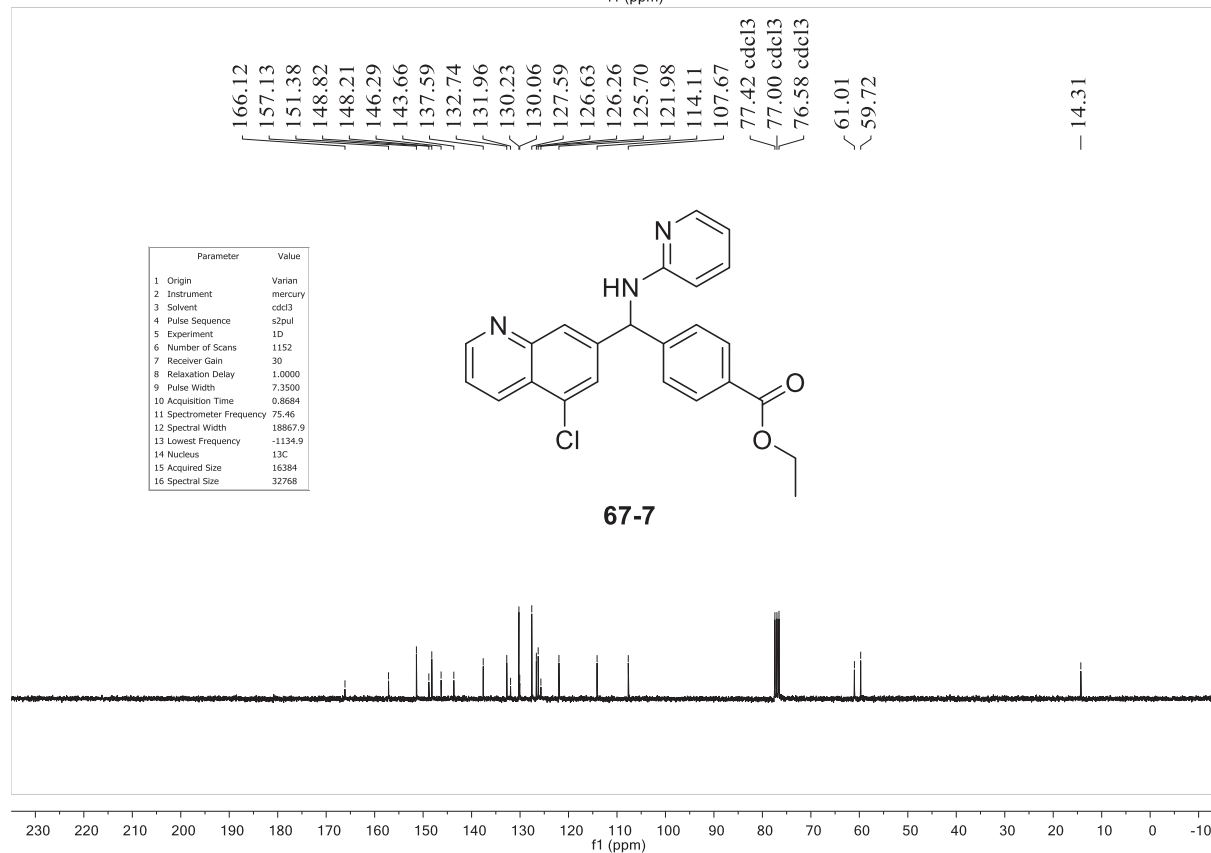

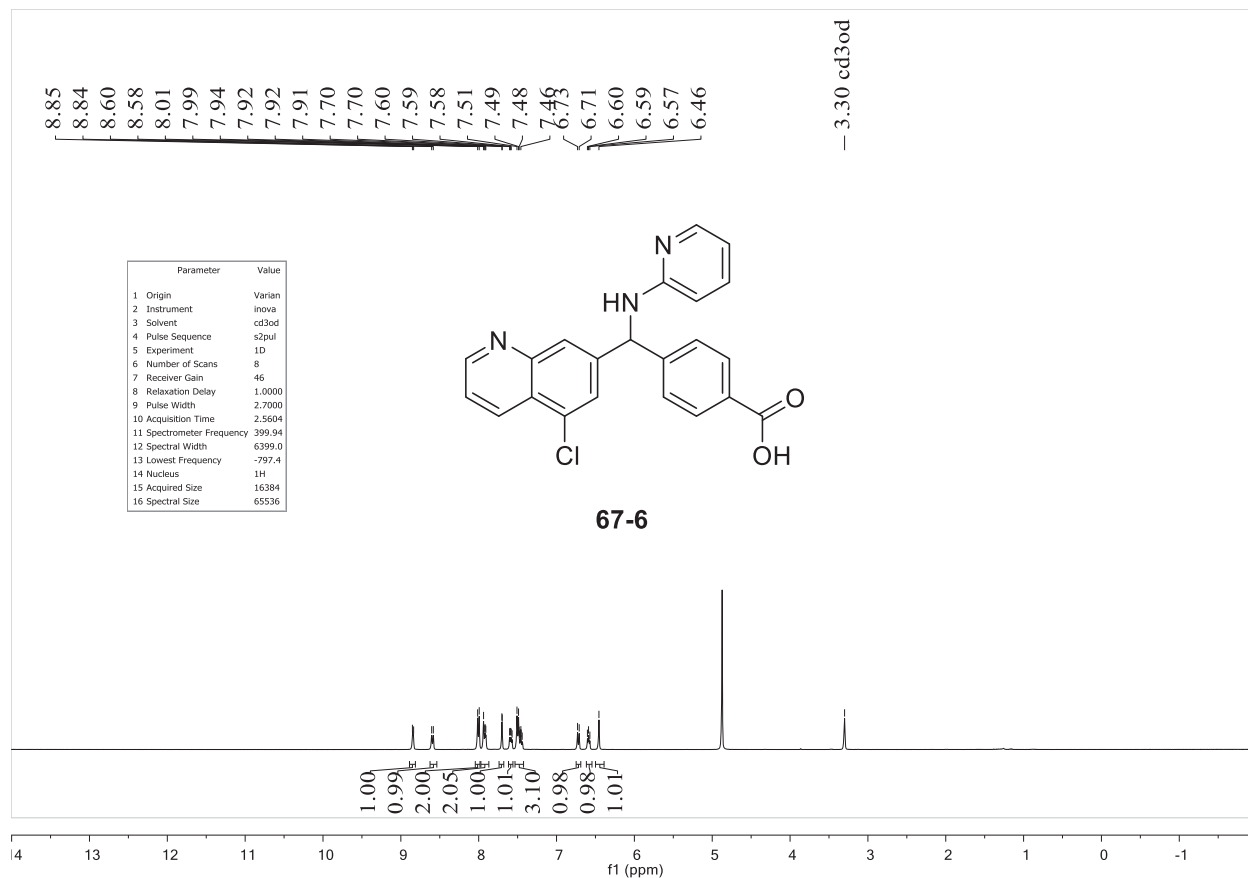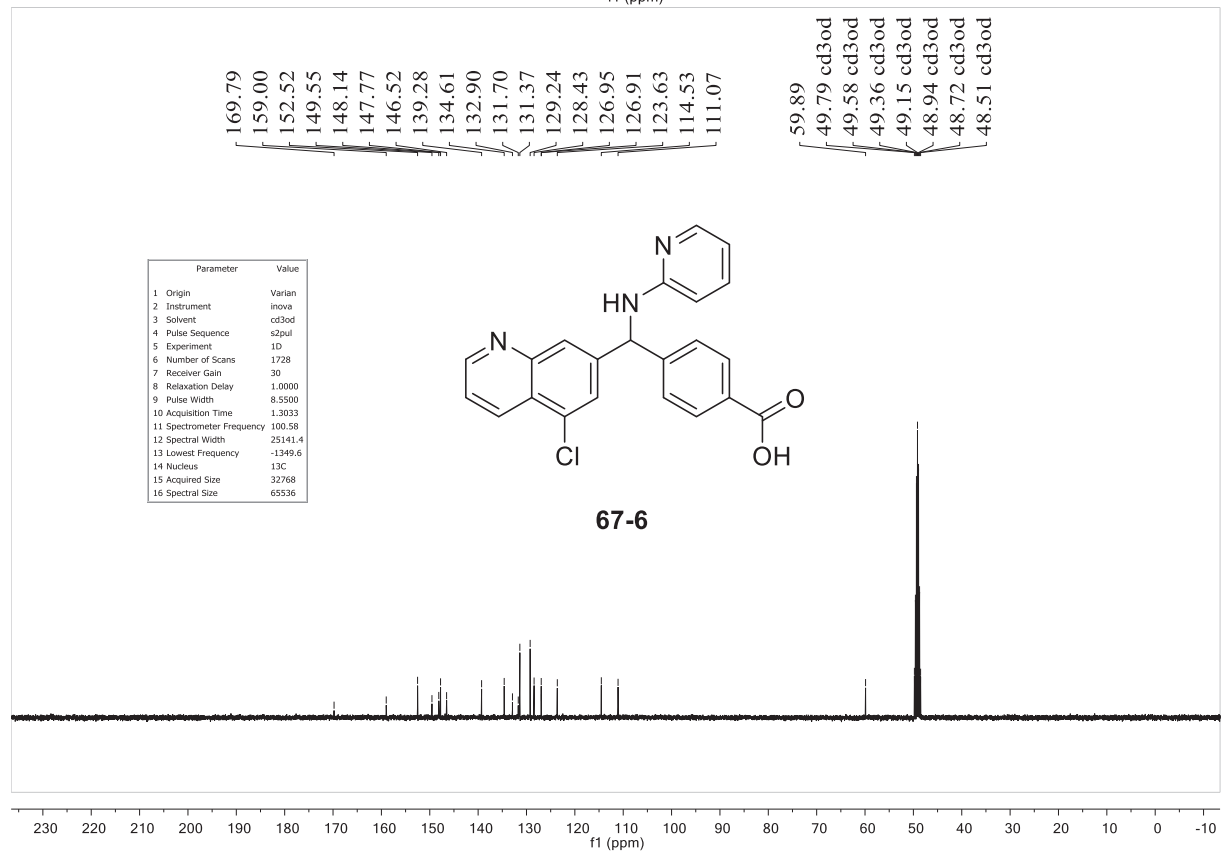

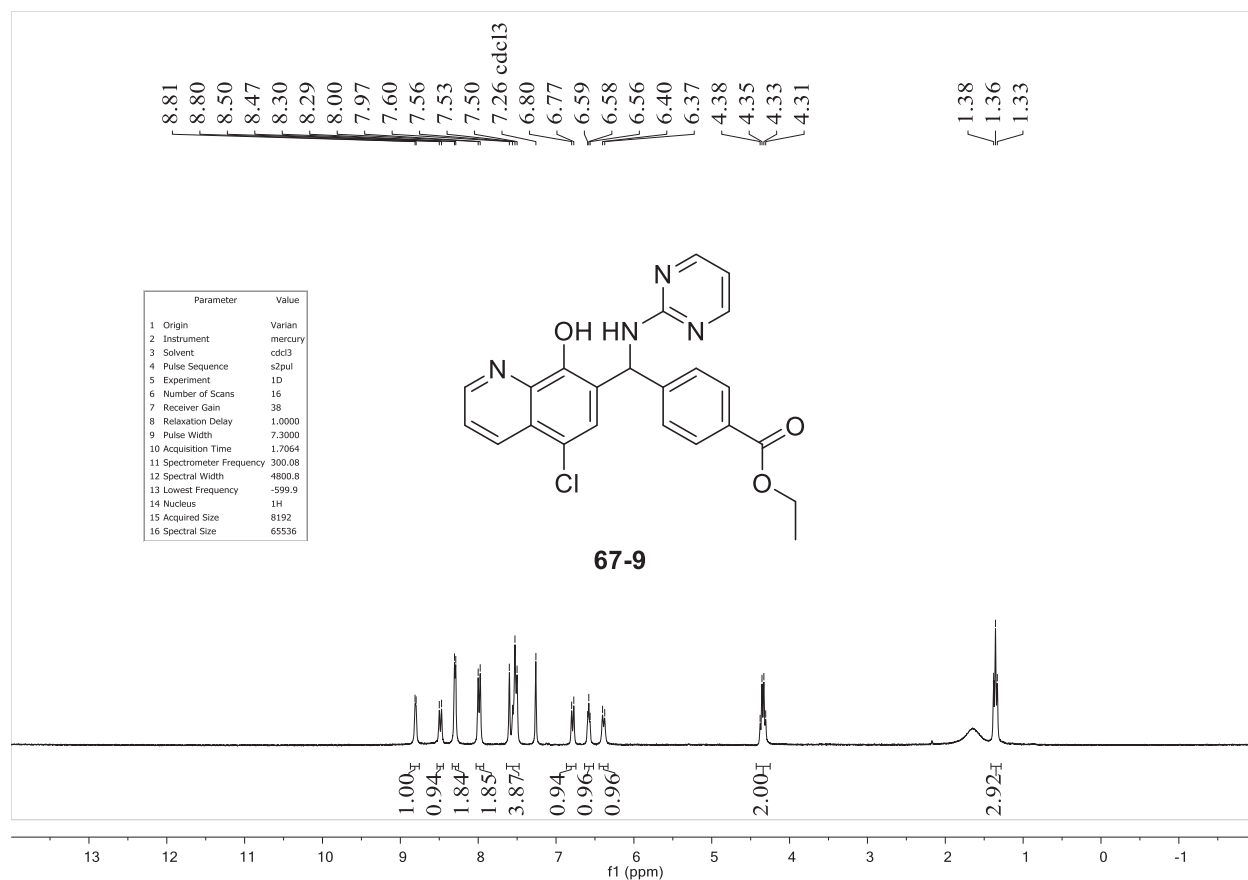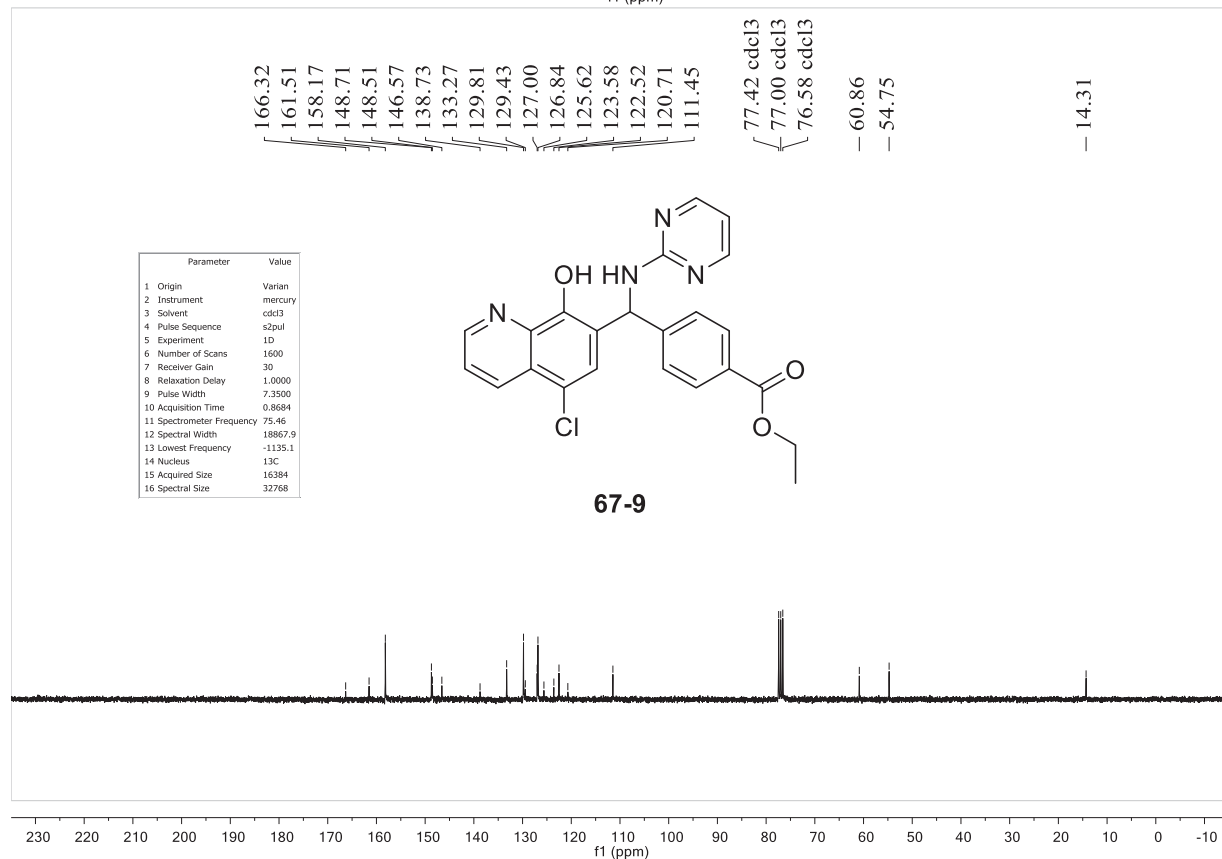

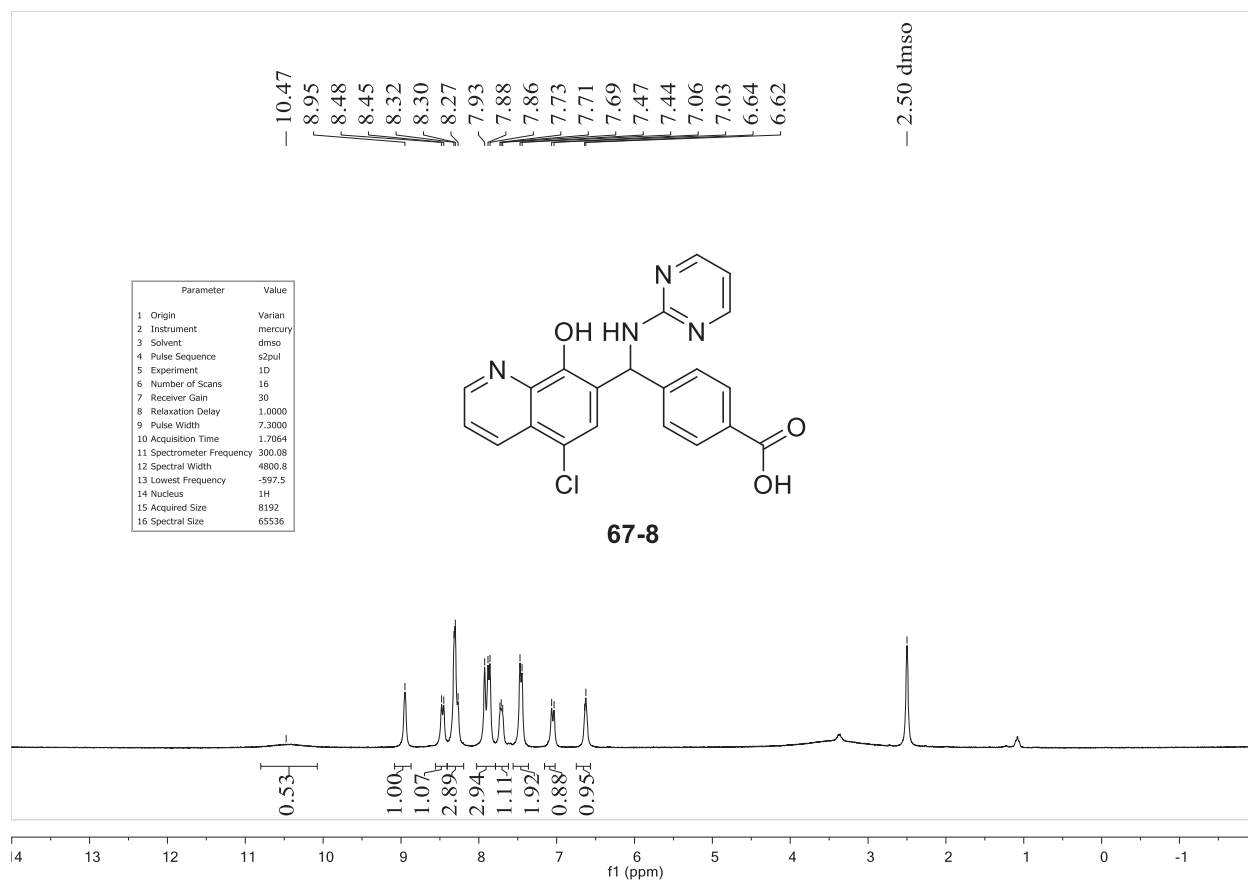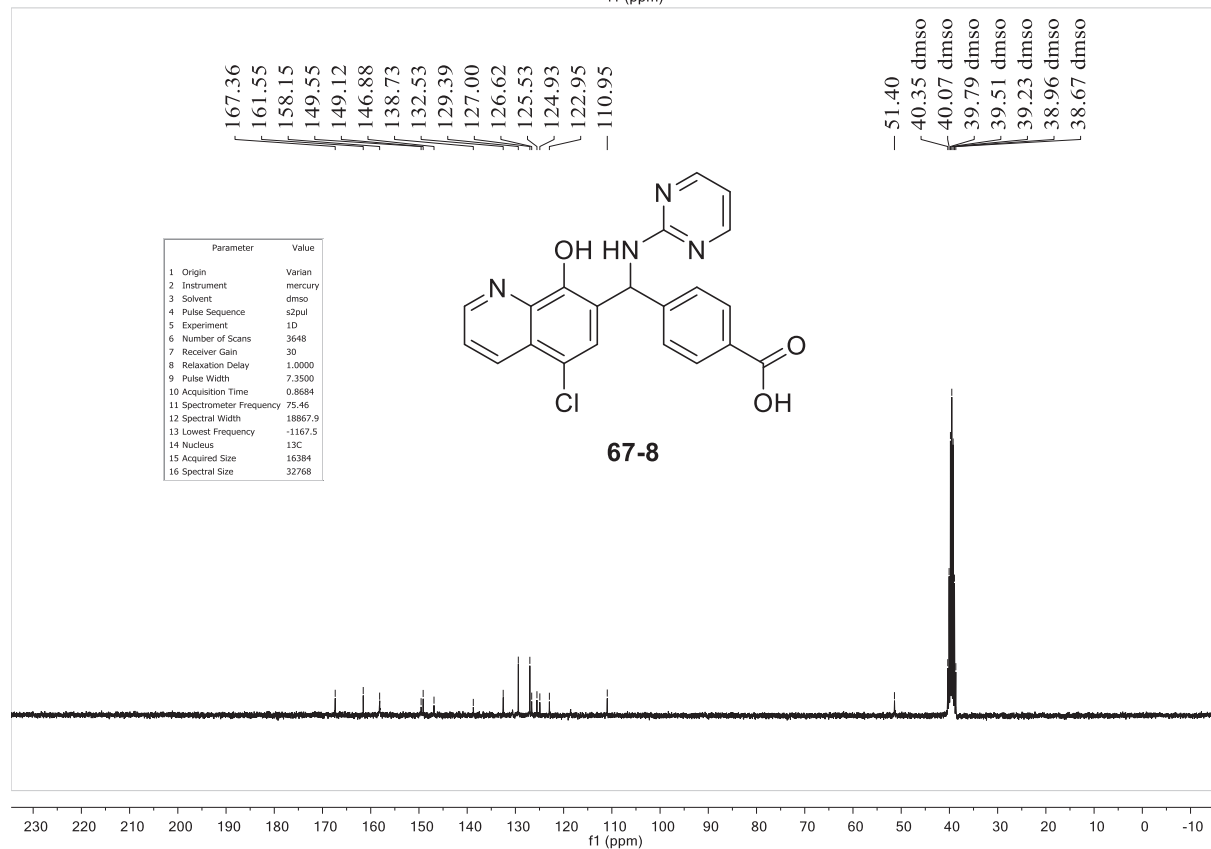

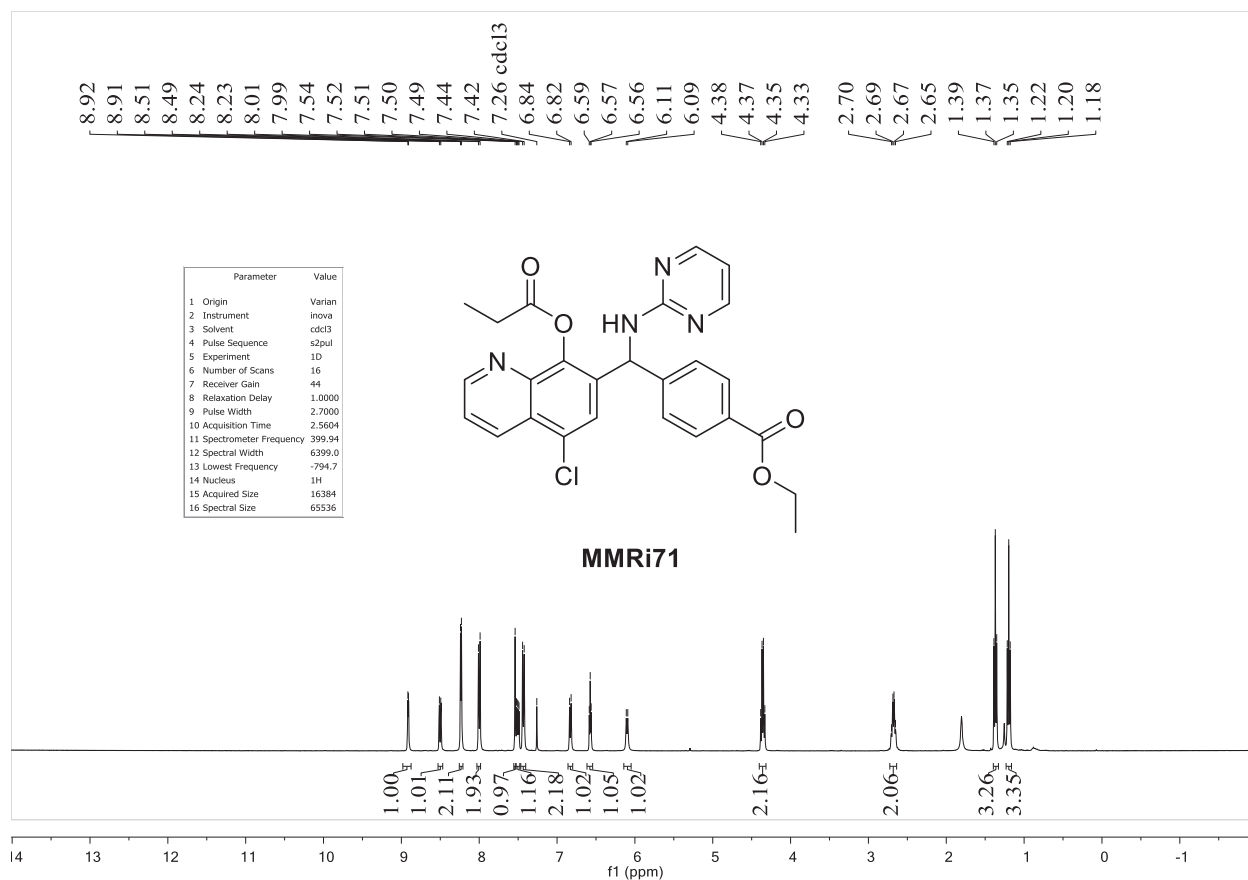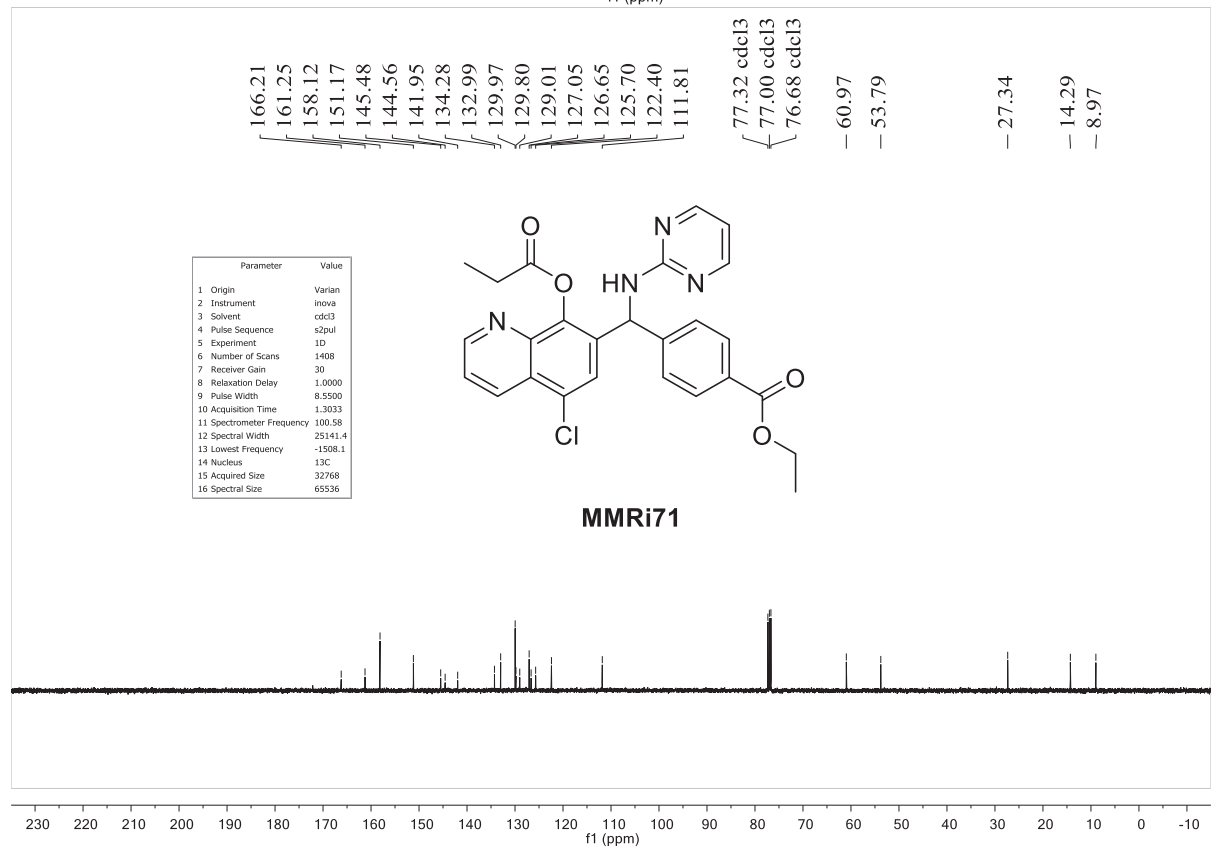

Supplement: s1 [file s1]
